# Supplementary material for: Toxoplasma bradyzoites exhibit physiological plasticity of calcium and energy stores controlling motility and egress
Source: eLife. 2021 Dec 3;10:e73011. doi: 10.7554/eLife.73011 (PMC8683080; doi:10.7554/eLife.73011)
Supplement: Figure 1—source data 1. [file elife-73011-fig1-data1.xlsx]

## Sheet: Figure 1B
Figure 1B	% of egress or release from one vacuole or cyst
	A23187-Tachyzoites	A23187-Bradyzoites	zaprinast-Tachyzoites	zaprinast-Bradyzoites						Statistics	Two tailed P value
Independent epxeriment #1	100	12.5	87.5	1.7		A23187-Tachyzoites vs A23187-Bradyzoites				Mann-Whitney test	<0.0001
	75	4.17	100	8.3		zaprinast-Tachyzoites vs zaprinast-Bradyzoites				Mann-Whitney test	<0.0001
	100	8.3	87.5	9.375
	100	20	50	10
	87.5	7.69	100	0.1
	91.67	17.86	100	1.67
	100	36.36	62.5	2.42
	100	48.67	100	7.76
	87.5	1.5625	100	9.96
	100	56.25	100	1.51
Independent epxeriment #2	100	3.91	100	5.23
	100	0.78125	100	2.2
	87.5	2.78	75	8.62
	77.27	3.91	62.5	1.15
	100	7.8125	62.5	4.58
	100	6.25	81.25	8.25
	86.11	3.125	75	9.25
	100	12.5	75	1.45
	72.73	4.6875	81.25	2.56
	100	0.67	100	6.5
Number of values	20	20	20	20
Minimum	72.73	0.67	50	0.1
Maximum	100	56.25	100	10
Range	27.27	55.58	50	9.9
Mean	93.26	12.99	85	5.129
Std. Deviation	9.484	15.95	16.4	3.533
Std. Error of Mean	2.121	3.566	3.667	0.79
