# Supplementary material for: Toxoplasma bradyzoites exhibit physiological plasticity of calcium and energy stores controlling motility and egress
Source: eLife. 2021 Dec 3;10:e73011. doi: 10.7554/eLife.73011 (PMC8683080; doi:10.7554/eLife.73011)
Supplement: Figure 1—source data 2. [file elife-73011-fig1-data2.xlsx]

## Sheet: Sheet1
Figure 1C	Maximum egress distance (μm)
	A23187-Tachyzoites	A23187-Bradyzoites	zaprinast-Tachyzoites	zaprinast-Bradyzoites						Statistics	Two tailed P value
Independent experiment #1	53.42	10.8	8.61	0.62		A23187-Tachyzoites vs A23187-Bradyzoites				Mann-Whitney test	<0.0001
	48.5	8.8	12.93	0.88		zaprinast-Tachyzoites vs zaprinast-Bradyzoites				Mann-Whitney test	<0.0001
	45.2	8.5	6.37	0
	41.8	7.4	24.22	0.41
	36.4	7.32	42.03	0
	33	1.2	12.11	1.06
	29	0	0.97	4.65
	27.7	1.5	14.69	3.09
	27.5	0	25.5	0
	25.4	3.2	16.61	0
Independent experiment #2	24.8	0	2.94	1.71
	24	1.2	23.62	4.66
	23.5	6.4	16.83	0.74
	22	5.8	14.16	0.95
	21	4.36	16.42	3.07
	21.8	4.2	35.15	3.84
	20.9	3.9	2.76	2.53
	18	3.2	6.43	1.87
	17	2.8	19.13	0.61
	19.5	2.5	10.52	1.22
Number of values	20	20	20	20
Minimum	17	0	0.97	0
Maximum	53.42	10.8	42.03	4.66
Range	36.42	10.8	41.06	4.66
Mean	29.02	4.154	15.6	1.596
Std. Deviation	10.64	3.21	10.61	1.534
Std. Error of Mean	2.378	0.7177	2.372	0.3431
