# Supplementary material for: Toxoplasma bradyzoites exhibit physiological plasticity of calcium and energy stores controlling motility and egress
Source: eLife. 2021 Dec 3;10:e73011. doi: 10.7554/eLife.73011 (PMC8683080; doi:10.7554/eLife.73011)
Supplement: Figure 1—source data 3. [file elife-73011-fig1-data3.xlsx]

## Sheet: Sheet1
Figure 1D	Speed of egressed parasites (μm/s)
	A23187-Tachyzoites	A23187-Bradyzoites	zaprinast-Tachyzoites	zaprinast-Bradyzoites						Statistics	Two tailed P value
Independent experiment #1	1.08	0.32	0.681	0.285		A23187-Tachyzoites vs A23187-Bradyzoites				Unpaired t test	<0.0001
	0.73	0.21	0.672	0.24		zaprinast-Tachyzoites vs zaprinast-Bradyzoites				Unpaired t test	<0.0001
	0.81	0.293	0.725	0.417
	0.83	0.19	0.892	0.454
	1.03	0.37	0.614	0.193
	0.5	0.28	0.452	0.112
	0.78	0.46	0.723	0.383
	0.79	0.31	0.812	0.055
	0.67	0.34	0.953	0.212
	0.92	0.3725	0.621	0.182
Independent experiment #2	0.84	0.2427	0.92	0.162
	0.86	0.151	0.672	0.082
	0.69	0.31	0.532	0.064
	0.83	0.198	0.594	0.132
	0.717	0.125	0.742	0.099
	0.726	0.17	0.823	0.323
	0.783	0.27	0.62	0.267
	0.95	0.11	0.551	0.191
	0.71	0.405	0.629	0.231
	0.89	0.311	0.787	0.215
Number of values	20	20	20	20
Minimum	0.5	0.11	0.452	0.055
Maximum	1.08	0.46	0.953	0.454
Range	0.58	0.35	0.501	0.399
Mean	0.8068	0.2719	0.7008	0.215
Std. Deviation	0.1313	0.0958	0.1333	0.1143
Std. Error of Mean	0.02936	0.02142	0.02981	0.02556
