# Supplementary material for: Toxoplasma bradyzoites exhibit physiological plasticity of calcium and energy stores controlling motility and egress
Source: eLife. 2021 Dec 3;10:e73011. doi: 10.7554/eLife.73011 (PMC8683080; doi:10.7554/eLife.73011)
Supplement: Figure 2—source data 1. [file elife-73011-fig2-data1.xlsx]

## Sheet: Sheet1
Figure 2C	Western blotting analysis of ME49 BAG1-mCherry MIC2-GLuc reporter parasites
											Type	Antibody	Dilution	Source	Llink
											Primary	Mouse anti-c-myc	1:1000	mAb 9E10, BioLegend, Cat# 626802	https://www.biolegend.com/en-us/products/purified-anti-c-myc-antibody-2873
											Primary	Rabbit anti-M2AP	1:1000	Rabenau K. E et al. TgM2AP participates in Toxoplasma gondii invasion of host cells and is tightly associated with the adhesive protein TgMIC2. Mol. Microbiol. 2001;41:537–547. Vernon B. Carruthers Lab
											Primary	Mouse mAb DG52 anti-SAG1	1:1000	Long, Shaojun et al. “Calmodulin-like proteins localized to the conoid regulate motility and cell invasion by Toxoplasma gondii.” PLoS pathogens vol. 13,5 e1006379. 5 May. 2017, doi:10.1371/journal.ppat.1006379
											Primary	Mouse mAb 8.25.8 anti-BAG1	1:1000	Weiss, L M et al. “Identification of Toxoplasma gondii bradyzoite-specific monoclonal antibodies.” The Journal of infectious diseases vol. 166,1 (1992): 213-5. doi:10.1093/infdis/166.1.213. Louis Weiss Lab
											Primary	Rabbit polyclonal antibody to recombinant TgActin1	1:1000	Sahoo, Nivedita et al. “Unusual kinetic and structural properties control rapid assembly and turnover of actin in the parasite Toxoplasma gondii.” Molecular biology of the cell vol. 17,2 (2006): 895-906. doi:10.1091/mbc.e05-06-0512
											Secondary	IRDye 800CW Goat anti-mouse IgG	1:5000	LI-COR Biotechnology, Cat# Cat# 926-32210	https://www.licor.com/bio/reagents/irdye-800cw-goat-anti-mouse-igg-secondary-antibody
											Secondary	IRDye 680RD Goat anti-rabbit IgG	1:10000	LI-COR Biotechnology,Cat# 926-68071	https://www.licor.com/bio/reagents/irdye-680rd-goat-anti-rabbit-igg-secondary-antibody
			Black boxes indicate the cropped protein band in Figure 2C
