# Supplementary material for: Toxoplasma bradyzoites exhibit physiological plasticity of calcium and energy stores controlling motility and egress
Source: eLife. 2021 Dec 3;10:e73011. doi: 10.7554/eLife.73011 (PMC8683080; doi:10.7554/eLife.73011)
Supplement: Figure 2—source data 2. [file elife-73011-fig2-data2.xlsx]

## Sheet: Sheet1
Figure 2D	Gaussia luciferase assay relative light units (RLU)
	Tachyzoites									Bradyzoites
DMSO	575.833	538.833	543.333	704	798	728	2121.33	1989.33	2040.33	177	21	67	125	0	54	71	126	104
Ionomycin	2594.33	1886.33	1618.33	2326	2433	2439	3462.33	3463.33	3430.33	302	536	87	454	130	114	294	315	302
zaprinast	1600.33	1681.33	1810.33	2178	2131	1897	2858.33	2723.33	2668.33	187	449	254	292	137	0	115	144	131
	Exp1			Exp2			Exp3			Exp1			Exp2			Exp3
Multiple t tests
	P value	Mean of Tachyzoites	Mean of Bradyzoites	Difference	SE of difference	t ratio	df	q value
zaprinast	0.000479	1115	82.78	1033	236.5	4.367	16	0.000484
Ionomycin	<0.000001	2628	281.6	2347	234.5	10.01	16	<0.000001
DMSO	<0.000001	2172	189.9	1982	163.7	12.11	16	<0.000001
	Tachyzoites			Bradyzoites
	Mean	SEM	N	Mean	SEM	N
DMSO	1115.44	235.763	9	82.7778	18.583	9
Ionomycin	2628.11	228.923	9	281.556	50.756	9
zaprinast	2172	157.985	9	189.889	42.7721	9
