# Supplementary material for: Toxoplasma bradyzoites exhibit physiological plasticity of calcium and energy stores controlling motility and egress
Source: eLife. 2021 Dec 3;10:e73011. doi: 10.7554/eLife.73011 (PMC8683080; doi:10.7554/eLife.73011)
Supplement: Figure 2—source data 3. [file elife-73011-fig2-data3.xlsx]

## Sheet: Sheet1
Figure 2G FNR-mCherry fluorescence fold changes vs time of FNR-mCherry BAG1-EGFP reporter tachyzoites and bradyzoites in EC buffer treated with A23187 (2 μM) or 0.25 mg/ml trypsin.
	GCaMP6f fluorescence intensity fold changes (F/F0)
Time (min)	Tachyzoites-A23187					Bradyzoites-DMSO					Bradyzoites-A23187						Bradyzoites-Trypsin
0	1	1	1	1	1	1	1	1	1	1	1	1	1	1	1	1	1	1	1	1
0.5	0.912337	0.960421	0.892468	0.916829	0.937212	0.993006	0.944696	0.986707	0.973159	0.990891	0.960958	0.958452	0.945604	0.976706	0.939718	0.81936	0.853261	0.746755	0.768421	0.815583
1	0.722558	0.863766	0.823067	0.914575	0.885855	0.97302	0.925546	0.981693	0.980402	0.986066	0.949158	0.948461	0.934516	0.963086	0.928903	0.76778	0.501126	0.511646	0.665987	0.490892
1.5	0.575502	0.747029	0.686026	0.482262	0.818207	0.966133	0.912432	0.984738	0.974598	0.986481	0.946029	0.935516	0.920978	0.966408	0.910436	0.704293	0.402671	0.500331	0.623921	0.450826
2	0.651939	0.559955	0.653161	0.414636	0.67789	0.941469	0.904648	0.972435	0.967785	0.975136	0.938815	0.928434	0.911247	0.96545	0.907568	0.669687	0.345211	0.444537	0.585285	0.363377
2.5	0.598315	0.591776	0.59629	0.364324	0.664969	0.943999	0.894919	0.965362	0.951075	0.978794	0.934752	0.922797	0.907343	0.930777	0.90008	0.632467	0.338511	0.372442	0.528954	0.347499
3	0.560969	0.667945	0.455952	0.351126	0.649187	0.921702	0.871182	0.954328	0.956923	0.965034	0.9337	0.915569	0.906739	0.926289	0.882248	0.562456	0.332265	0.332889	0.497677	0.340593
3.5	0.625504	0.510608	0.438237	0.348259	0.634906	0.904697	0.904249	0.95172	0.952557	0.949322	0.924437	0.907606	0.902154	0.920757	0.87152	0.473699	0.325017	0.330524	0.41748	0.325623
4	0.391056	0.452279	0.580858	0.325683	0.59836	0.898221	0.897399	0.928993	0.94487	0.927989	0.92395	0.897693	0.891438	0.897614	0.861528	0.434545	0.318556	0.321673	0.396825	0.297605
4.5	0.415815	0.432012	0.533859	0.300894	0.564507	0.881206	0.887364	0.914199	0.945283	0.905954	0.919666	0.888019	0.85749	0.891755	0.846943	0.426013	0.281295	0.315424	0.376823	0.295344
5	0.529237	0.310715	0.50004	0.318075	0.572556	0.873121	0.888926	0.917382	0.9382	0.904891	0.917788	0.872726	0.849088	0.866958	0.846895	0.42093	0.278831	0.275148	0.362255	0.285059
5.5	0.438848	0.432683	0.442553	0.299488	0.457297	0.864979	0.866042	0.912217	0.931428	0.906442	0.905652	0.867672	0.841549	0.857401	0.80621	0.412092	0.245573	0.267344	0.344632	0.273027
6	0.399311	0.485448	0.417802	0.281886	0.556735	0.849075	0.850591	0.914935	0.920017	0.896323	0.90034	0.851187	0.835899	0.842392	0.800244	0.371863	0.241578	0.260784	0.333543	0.266846
6.5	0.398795	0.522422	0.350039	0.284531	0.424781	0.849341	0.812674	0.902374	0.896415	0.880852	0.899387	0.844756	0.821576	0.842297	0.798089	0.371355	0.238172	0.256861	0.325185	0.248989
7	0.346107	0.461965	0.439382	0.261011	0.407952	0.837194	0.798186	0.901968	0.790695	0.879715	0.884174	0.836426	0.817158	0.793159	0.798	0.361144	0.227024	0.253469	0.307718	0.248762
7.5	0.307435	0.4358	0.484399	0.259113	0.354943	0.827669	0.783961	0.876718	0.786041	0.86998	0.87795	0.83296	0.807923	0.791116	0.766224	0.35884	0.219607	0.250018	0.294264	0.238064
8	0.316464	0.45323	0.44343	0.224946	0.333111	0.801962	0.753927	0.858338	0.765378	0.829176	0.867782	0.827135	0.810364	0.766802	0.719947	0.331168	0.212565	0.243972	0.298542	0.223793
8.5	0.405522	0.394967	0.388771	0.253841	0.323841	0.791692	0.745105	0.84238	0.762737	0.731325	0.859946	0.805696	0.805609	0.765055	0.68845	0.32899	0.204954	0.233804	0.28424	0.218678
9	0.328958	0.483839	0.336131	0.288128	0.317737	0.770087	0.75436	0.842068	0.756749	0.725886	0.844099	0.773233	0.784367	0.695109	0.682239	0.30318	0.201226	0.233179	0.26011	0.201494
9.5	0.46219	0.235567	0.421603	0.264915	0.357924	0.765617	0.727721	0.802583	0.691546	0.712458	0.83641	0.767427	0.727121	0.672787	0.650395	0.287743	0.180074	0.216669	0.258075	0.19953
10	0.475358	0.337128	0.285559	0.247144	0.301248	0.762924	0.712068	0.782192	0.674061	0.703134	0.823613	0.747666	0.714866	0.602191	0.537802	0.272816	0.176183	0.20768	0.244147	0.188711
	#1	#2	#3	#4	#5	#1	#2	#3	#4	#5	#1	#2	#3	#4	#5	#1	#2	#3	#4	#5
