# Supplementary material for: Toxoplasma bradyzoites exhibit physiological plasticity of calcium and energy stores controlling motility and egress
Source: eLife. 2021 Dec 3;10:e73011. doi: 10.7554/eLife.73011 (PMC8683080; doi:10.7554/eLife.73011)
Supplement: Figure 3—figure supplement 1—source data 1. [file elife-73011-fig3-figsupp1-data1.xlsx]

## Sheet: Sheet1
Figure 3 Supplement 1B	Developmental heterology of bradyzoites within cyst induced in vitro
	% of BAG1-positive SAG1 negative parasites within each cyst
		pH8.2 induction	3 days	5 days	7 days
			0	100	95.2381
			0	0	100
			0	12	100
			100	85	0
			0	84.09	100
			0	78.57	0
			34.4828	92.73	80
			0	92.6471	91.3043
			5.88235	87.5	45.4545
			17.8571	100	75
			61.1111	8.33333	88.8889
			11.7647	28.5714	52.9412
			0	0	92.7083
			0	50	0
			0	20	100
			11.7647	5.55556	74.2424
			6.45161	0	100
			0	0	90.625
			0	100	0
			0	33.75	100
			3 days	5 days	7 days
		Mean	12.47	48.94	69.32
		Std. Deviation	25.64	41.37	38.67
		Std. Error of Mean	5.733	9.25	8.647
		Kruskal-Walis test mutiple comparision
		Dunn's multiple comparisons test	Mean rank diff.	Significant?	Summary	Adjusted P Value
		3 days vs. 5 days	-14.6	Yes	*	0.0139
		3 days vs. 7 days	-20.88	Yes	***	0.0002
