# Supplementary material for: Toxoplasma bradyzoites exhibit physiological plasticity of calcium and energy stores controlling motility and egress
Source: eLife. 2021 Dec 3;10:e73011. doi: 10.7554/eLife.73011 (PMC8683080; doi:10.7554/eLife.73011)
Supplement: Figure 3—figure supplement 1—source data 2. [file elife-73011-fig3-figsupp1-data2.xlsx]

## Sheet: Sheet1
Figure 3 supplement 1D	Fluorescent intensities of BAG1-mCherry and GCaMP6f of bradyzoites within the same cyst
	Fluorescence intensity
Distance from start point of the white arrow indicated in Figure 3 supplement 1C (µm)	GCaMP6f	BAG1-mCherry
0	11374	8190
0.32346	11693	8382
0.64692	11693	8382
0.970381	11864	8913
1.29384	11920	9865
1.6173	12219	10655
1.94076	12189	10601
2.26422	12427	10059
2.58768	12461	10095
2.91114	12461	10095
3.2346	11973	8935
3.55806	12472	8197
3.88152	12793	8213
4.20498	12927	7706
4.52844	12929	7775
4.8519	12890	8597
5.17536	13089	8191
5.49882	13576	8158
5.82228	13462	8179
6.14574	12846	8291
6.4692	13055	8264
6.79267	13141	8974
7.11613	12571	9025
7.43959	12891	9699
7.76305	13106	10501
8.08651	12807	10931
8.40997	12844	12478
8.73343	12784	13465
9.05689	12882	14110
9.38035	12854	17888
9.70381	13735	22099
10.0273	13735	22099
10.3507	14482	26610
10.6742	14938	30159
10.9976	14464	29502
11.3211	14464	29502
11.6446	15278	30383
11.968	15449	30379
12.2915	15449	30379
12.6149	15751	29007
12.9384	15853	28883
13.2619	15841	28387
13.5853	15928	27329
13.9088	15462	25371
14.2323	15619	24572
14.5557	15583	22850
14.8792	14971	20602
15.2026	15114	20230
15.5261	14989	20163
15.8496	14666	19520
16.173	14698	19789
16.4965	15127	20371
16.8199	14721	21303
17.1434	14725	20920
17.4669	15035	20750
17.7903	15167	18919
18.1138	14543	18162
18.4372	14944	17635
18.7607	14368	16989
19.0842	14182	17138
19.4076	13912	16435
19.7311	14130	17351
20.0545	14020	18631
20.378	14280	18095
20.7015	14186	19464
21.0249	14184	20755
21.3484	14181	22077
21.6718	14181	22077
21.9953	15000	23395
22.3188	14258	23591
22.6422	14494	23549
22.9657	14573	24314
23.2891	14862	25019
23.6126	14486	25305
23.9361	14486	25305
24.2595	14587	27045
24.583	14538	27296
24.9064	14477	26890
25.2299	14765	27627
25.5534	14263	25952
25.8768	14306	24874
26.2003	14725	24110
26.5237	14838	21424
26.8472	14872	20696
27.1707	14914	19087
27.4941	15131	18428
27.8176	15428	19541
28.141	15413	19425
28.4645	15348	19705
28.788	15849	19446
29.1114	15405	19679
29.4349	14850	19714
29.7583	15057	19918
30.0818	15154	20309
30.4053	14906	20237
30.7287	14998	21173
31.0522	14998	21173
31.3756	14682	21159
31.6991	14507	21484
32.0226	14507	21484
32.346	14390	21048
32.6695	14411	20691
32.9929	14485	19464
33.3164	14485	19464
33.6399	14907	18329
33.9633	14568	18319
34.2868	14702	18593
34.6102	14443	17479
34.9337	14811	17204
35.2572	14850	17207
35.5806	15029	17392
35.9041	14733	19110
36.2275	14761	18792
36.551	14953	18146
36.8745	14674	18897
37.1979	14641	18062
37.5214	15124	17352
37.8448	15009	16895
38.1683	14910	17008
38.4918	15210	16980
38.8152	15464	18361
39.1387	15764	19308
39.4622	15460	19234
39.7856	15225	19791
40.1091	15510	20360
40.4325	15510	20360
40.756	14833	20154
41.0795	15572	19170
41.4029	16020	20352
41.7264	15968	19700
42.0498	16539	19807
42.3733	16250	19766
42.6968	16250	19766
43.0202	16249	20080
43.3437	16095	20303
43.6671	16095	20303
43.9906	15797	20415
44.3141	16186	19298
44.6375	16079	19130
44.961	16275	19043
45.2844	15902	19520
45.6079	16188	19447
45.9314	16329	19054
46.2548	16842	19090
46.5783	16471	18432
46.9017	16227	17748
47.2252	16206	17655
47.5487	16303	18145
47.8721	16343	17850
48.1956	16307	18429
48.519	16393	18104
48.8425	16471	18140
49.166	16032	18189
49.4894	16098	17637
49.8129	15586	17607
50.1363	15806	17538
50.4598	15615	17519
50.7833	15639	18215
51.1067	15286	17724
51.4302	15210	18176
51.7536	15350	19098
52.0771	15350	19098
52.4006	15231	19139
52.724	15384	19646
53.0475	15384	19646
53.3709	15135	19404
53.6944	15125	21096
54.0179	15211	21605
54.3413	15211	21605
54.6648	14985	21404
54.9882	15162	20805
55.3117	15162	20805
55.6352	15560	21697
55.9586	15662	22231
56.2821	15110	21743
56.6055	15770	22709
56.929	15783	23011
57.2525	15640	22338
57.5759	15558	21987
57.8994	15313	22293
58.2228	14464	22060
58.5463	14777	21393
58.8698	14204	20995
59.1932	14251	20585
59.5167	14056	20724
59.8401	14156	19989
60.1636	13617	20572
60.4871	13742	21298
60.8105	14332	22311
61.134	14345	23177
61.4574	14922	24133
61.7809	14955	24920
62.1044	14603	27252
62.4278	14616	27208
62.7513	14215	27747
63.0747	14752	29491
63.3982	15143	30166
63.7217	15143	30166
64.0451	14474	30838
64.3686	14358	30767
64.692	14358	30767
65.0155	14051	29533
65.339	13755	28888
65.6624	13823	29054
65.9859	14153	29611
66.3094	14587	30997
66.6328	14609	32360
66.9563	14609	32360
67.2797	15830	34596
67.6032	15524	35448
67.9267	15599	36492
68.2501	15387	36049
68.5736	15162	35925
68.897	15307	36002
69.2205	14977	34873
69.544	14677	35726
69.8674	15343	35915
70.1909	14748	35839
70.5143	14815	36633
70.8378	14869	36160
71.1613	14900	34587
71.4847	14629	34880
71.8082	14998	36462
72.1316	15029	34623
72.4551	14660	33748
72.7786	14442	34768
73.102	14272	33211
73.4255	14424	31454
73.7489	14427	29528
74.0724	14427	29528
74.3959	14155	28250
74.7193	13933	26502
75.0428	14043	25409
