# Supplementary material for: Toxoplasma bradyzoites exhibit physiological plasticity of calcium and energy stores controlling motility and egress
Source: eLife. 2021 Dec 3;10:e73011. doi: 10.7554/eLife.73011 (PMC8683080; doi:10.7554/eLife.73011)
Supplement: Figure 3—source data 1. [file elife-73011-fig3-data1.xlsx]

## Sheet: Sheet1
Figure 3C	Time of calcium dual reporter tachyzoites and bradyzoites with different ages to calcium peak level in repsonse A23187
						Bradyzoites induction time(Days)
					Tachyzoites	4	5	6	7
				Independent Experiment 1	0.863	2.92	2.1	4.13	5.05
					1.11	2.4	1.73	2.975	6.36
					1.048	1.4	2.48325	2.83	3.9625
					0.987	1.61	2.805	4.39	5.28
					0.802	1.8	4.29	2.83	3.31
				Independent Experiment 2	0.6783	2.1	3.3	2.55	4.76
					0.49	1.8	2.97	2.975	5.16
					0.74	2.05	2.64	3.4	5.55
					0.863	1.41	3.3	3.39	2.8
					0.555	3.4	2.14	4.96	5.97
		Bradyzoites were induced for 4, 5, 6, 7 days at pH 8.2 and then were stimulated by A23187 (2 μM) for 10 min
				One way ANOVA with Dunn’s Multiple Comparison Correction Test
			Number of families	1
			Number of comparisons per family	4
			Alpha	0.05
			Dunnett's multiple comparisons test	Mean Diff.	95.00% CI of diff.	Significant?	Summary	Adjusted P Value	A-?
			Tachyzoites vs. Bradyzoites-4 days	-1.275	-2.144 to -0.4063	Yes	**	0.0021	B	Bradyzoites-4 days
			Tachyzoites vs. Bradyzoites-5 days	-1.962	-2.831 to -1.093	Yes	****	<0.0001	C	Bradyzoites-5 days
			Tachyzoites vs. Bradyzoites-6 days	-2.629	-3.498 to -1.760	Yes	****	<0.0001	D	Bradyzoites-6 days
			Tachyzoites vs. Bradyzoites-7 days	-4.007	-4.876 to -3.138	Yes	****	<0.0001	E	Bradyzoites-7 days
			Test details	Mean 1	Mean 2	Mean Diff.	SE of diff.	n1	n2	q	DF
			Tachyzoites vs. Bradyzoites-4 days	0.8136	2.089	-1.275	0.3433	10	10	3.715	45
			Tachyzoites vs. Bradyzoites-5 days	0.8136	2.776	-1.962	0.3433	10	10	5.715	45
			Tachyzoites vs. Bradyzoites-6 days	0.8136	3.443	-2.629	0.3433	10	10	7.659	45
			Tachyzoites vs. Bradyzoites-7 days	0.8136	4.82	-4.007	0.3433	10	10	11.67	45
				Tachyzoites	Bradyzoites-4 days	Bradyzoites-5 days	Bradyzoites-6 days	Bradyzoites-7 days
			Number of values	10	10	10	10	10
			Minimum	0.49	1.4	1.73	2.55	2.8
			Maximum	1.11	3.4	4.29	4.96	6.36
			Range	0.62	2	2.56	2.41	3.56
			Mean	0.8136	2.089	2.776	3.443	4.82
			Std. Deviation	0.2036	0.6532	0.7408	0.7931	1.14
			Std. Error of Mean	0.06439	0.2066	0.2343	0.2508	0.3607
