# Supplementary material for: Toxoplasma bradyzoites exhibit physiological plasticity of calcium and energy stores controlling motility and egress
Source: eLife. 2021 Dec 3;10:e73011. doi: 10.7554/eLife.73011 (PMC8683080; doi:10.7554/eLife.73011)
Supplement: Figure 3—source data 2. [file elife-73011-fig3-data2.xlsx]

## Sheet: Sheet1
Figure 3D GCaMP6f fluorescence intensity changes vs time of GCaMP6f BAG1-mCherry tachyzoites and bradyzoites
	GCaMP6f fluorescence intensity fold changes (F/F0)
Time (min)	Tachyzoites					Bradyzoites-4 days					Bradyzoites-5 days					Bradyzoites-6 days					Bradyzoites-7 days
0	1	1	1	1	1	1	1	1	1	1	1	1	1	1	0.949653	1	1	1	1	1	1	1	1	1	1
0.133333	0.948903	1.04903	0.916471	0.986549	0.971808	0.947293	0.997092	1.01948	1.00087	1.01511	0.983664	1.06848	0.87762	0.9872	0.91305	1.12294	0.975942	0.919613	0.973609	0.9676	0.938186	1.11353	1.00115	0.918659	0.891441
0.266667	0.950987	1.0013	1.01217	0.930354	0.97051	0.918074	1.02945	1.01987	1.00111	1.01571	0.955286	1.02498	0.982555	0.98852	0.953076	1.011	1.01458	0.975428	0.951575	0.978316	1.01973	1.01577	1.01687	0.917476	0.885177
0.4	0.971749	1.00831	1.01279	0.904086	1.01576	0.979293	0.993393	0.994332	1.0019	1.13744	1.03539	0.92594	0.99302	0.994514	0.907159	1.01815	1.10804	0.921127	0.981452	0.944482	0.990613	1.03464	0.98324	0.917561	0.883173
0.533333	0.909175	1.0533	0.979201	1.08624	1.07342	1.11718	0.92993	0.935575	1.00442	1.01139	0.90853	1.05972	1.00367	0.973434	0.907965	1.01328	1.02303	1.04135	0.976472	0.94406	0.948904	1.12382	1.02338	0.882338	0.871065
0.666667	0.995816	0.9514	0.987894	1.17329	1.23462	1.04345	1.13657	0.909768	1.00869	1.18638	1.13527	0.953931	1.00354	0.972977	0.914359	1.03425	1.23081	1.03799	0.949458	0.961272	1.0731	1.05033	1.05418	0.890362	0.865303
0.8	1.56821	1.58478	1.54812	1.71015	1.35621	1.3663	1.3576	1.36774	1.01019	1.49484	1.10243	1.11394	1.12282	0.978412	0.933491	1.24708	1.20857	1.24717	0.936263	0.910648	1.13455	1.31635	1.11469	0.929555	0.895198
0.933333	3.12842	3.12085	3.13015	3.11049	3.31295	1.79725	1.80032	1.80426	1.01644	1.72931	1.20098	1.19857	1.19574	0.995378	0.922213	1.33024	1.38007	1.44382	0.931906	0.911829	1.1809	1.24046	1.2568	0.891376	0.859123
1.06667	3.49614	3.28436	3.40299	3.43776	3.34121	2.02798	2.16466	2.00943	1.01936	2.00971	1.41004	1.23687	1.25455	0.976025	0.91884	1.60068	1.48778	1.40631	0.942487	0.916807	1.14851	1.28289	1.36978	0.904806	0.869979
1.2	3.36884	3.44502	3.41818	3.44861	3.53325	2.38287	2.22357	2.33363	1.01952	2.29947	1.38383	1.41355	1.41019	1.00655	0.955644	1.59709	1.6007	1.56597	0.935267	0.860952	1.31107	1.30993	1.32252	0.878959	0.858539
1.33333	3.38206	3.47211	3.43156	3.39887	3.50873	2.59952	2.57603	2.44649	1.02465	2.52471	1.51026	1.56434	1.40851	0.997511	0.955996	1.59527	1.7808	1.63105	0.899539	0.863905	1.31592	1.46442	1.28816	0.889518	0.871816
1.46667	3.42296	3.48035	3.33075	3.30927	3.39491	2.68331	2.78469	2.86534	1.09498	2.74071	1.62592	1.64428	1.4825	1.51186	1.41285	1.70395	1.74392	1.74938	0.931159	0.893436	1.4856	1.44254	1.30047	0.886139	0.858622
1.6	3.32409	3.33799	3.34176	3.28103	3.33826	2.9776	2.9057	2.95695	1.50083	2.85152	1.66045	1.65226	1.66564	1.97242	1.78497	1.81638	1.68858	1.8715	0.93203	0.927607	1.48935	1.40833	1.4767	0.932511	0.872484
1.73333	3.3407	3.35049	3.17055	3.18268	3.34267	3.04089	3.0142	3.11997	1.95275	2.93824	1.65606	1.69181	1.83692	2.41113	2.19389	1.88136	1.74221	1.89964	0.95282	0.921785	1.49829	1.50828	1.50479	0.911648	0.893946
1.86667	3.30061	3.18855	3.11172	3.18013	3.20146	3.06015	3.05134	3.26615	2.45089	3.05865	1.80588	1.79763	1.78987	2.9582	2.70824	1.94103	1.79318	1.90716	0.963525	1.00135	1.67779	1.47808	1.52743	0.986739	1.00242
2	3.08934	3.1491	3.10222	3.021	3.12508	3.19179	3.18504	3.12544	2.80498	3.11238	1.85293	1.8514	1.8763	3.32676	3.03862	1.88331	2.02547	1.85429	1.05154	1.11306	1.57999	1.57171	1.69027	0.92001	0.9438
2.13333	3.04502	3.04205	3.04515	3.02046	3.06701	3.18935	3.17194	3.13454	2.9503	3.1366	2.02744	1.93509	1.82598	3.32885	3.16685	2.00259	2.01971	1.9336	1.3086	1.32265	1.66435	1.67189	1.66657	1.01242	1.07633
2.26667	2.99227	3.02495	3.03341	2.98832	3.00251	3.22231	3.03182	3.22417	3.09546	3.18734	1.90507	1.97981	1.98219	3.32885	3.21247	2.01476	2.0294	2.06448	1.6904	1.66335	1.74419	1.65088	1.76959	1.13439	1.18221
2.4	2.88378	3.04416	2.90701	2.95361	2.97314	3.14886	3.05896	3.17353	3.17211	3.30415	1.92001	2.02547	2.04036	3.32885	3.20929	2.03418	2.08246	2.159	2.00124	2.007	1.71303	1.80724	1.76984	1.2338	1.28576
2.53333	2.9197	2.94541	2.90003	2.94301	2.94963	3.18967	3.07001	3.0199	3.20853	3.27932	2.11928	2.05424	1.96538	3.32885	3.27122	2.1467	2.05716	2.2069	2.30188	2.2187	1.80777	1.8603	1.77111	1.31405	1.41921
2.66667	2.78032	2.88556	3.01612	2.92075	2.92878	2.9718	3.11237	3.06083	3.26329	3.25402	2.11108	2.04194	2.13715	3.32885	3.22999	2.14757	2.17165	2.22482	2.44616	2.29944	1.89095	1.86599	1.83301	1.40882	1.50472
2.8	2.85705	2.86828	2.84073	2.89914	2.90886	2.94634	3.00945	3.06452	3.18941	3.1697	2.15217	2.14549	2.11266	3.32885	3.19671	2.09027	2.31748	2.25802	2.57513	2.45689	1.93036	1.8611	1.94811	1.52082	1.62138
2.93333	2.87617	2.68901	2.82206	2.83649	2.86026	3.03998	2.91888	2.9382	3.10494	3.27848	2.18643	2.15426	2.15328	3.30167	3.1305	2.21354	2.36543	2.23184	2.73024	2.54008	1.89887	2.01667	1.98537	1.57404	1.65662
3.06667	2.72697	2.75756	2.76601	2.70105	2.73255	2.98659	2.79735	2.99883	2.94627	3.29743	2.19285	2.15968	2.18861	3.2429	3.10226	2.34049	2.27465	2.35637	3.04643	2.6949	1.98774	2.00071	2.02787	1.65647	1.69019
3.2	2.71399	2.74289	2.76675	2.56058	2.71086	2.98193	2.79	2.90256	2.8467	3.26361	2.27175	2.18372	2.09552	3.17555	3.0874	2.40804	2.38914	2.26934	3.47317	2.74916	2.09579	2.04619	1.98107	1.74128	1.74772
3.33333	2.76415	2.70844	2.68675	2.55375	2.65404	2.88754	2.74123	2.92233	2.9096	3.25402	2.04781	2.24991	2.23459	3.15721	3.05312	2.40227	2.35676	2.39025	3.33166	2.88129	2.07546	2.18418	1.94565	1.82668	1.73211
3.46667	#1	#2	#3	#4	#5	2.88187	2.78254	2.72674	2.78751	3.27129	2.17902	2.13329	2.18245	3.07889	3.02537	2.40273	2.46514	2.37981	3.14254	3.04379	2.02268	2.13965	2.14232	1.87178	1.76042
3.6						2.78849	2.73256	2.78254	2.77922	3.24514	2.11578	2.12854	2.17529	3.05501	3.00554	2.47729	2.39706	2.45959	3.16366	3.203	2.1961	2.02753	2.14448	1.94282	1.73795
3.73333						2.72892	2.7417	2.7336	2.73995	3.21684	2.03452	2.18258	2.17501	3.00904	2.91043	2.56287	2.44768	2.37286	3.11677	3.26367	2.2013	2.12254	2.04427	2.04908	1.72919
3.86667						2.59598	2.67636	2.77006	2.66377	3.13205	2.1065	2.10289	2.1045	2.95764	2.88491	2.62265	2.40689	2.57101	3.12984	3.40154	2.231	2.21418	2.13227	2.14402	1.71658
4						2.52741	2.69633	2.72887	2.687	3.18146	2.08112	2.11042	2.0888	2.82389	2.77465	2.52975	2.60684	2.58102	2.94846	3.42153	2.24089	2.28764	2.24092	2.25365	1.7433
4.13333						2.67021	2.64617	2.53058	2.60703	3.18086	2.11897	2.14963	1.99239	2.81617	2.75828	2.46973	2.67148	2.62546	2.81974	3.3785	2.32228	2.2764	2.23751	2.24478	1.8618
4.26667						2.57406	2.57834	2.59394	2.61446	3.07856	2.03321	2.18808	1.98286	2.79159	2.725	2.6103	2.5992	2.60349	2.8914	3.38188	2.27124	2.25556	2.38803	2.3904	1.99941
4.4						2.5962	2.49981	2.55916	2.5955	3.08803	1.90686	2.13801	2.06753	2.72002	2.71815	2.72331	2.58494	2.52035	2.92625	3.36694	2.33669	2.30901	2.35457	2.91376	2.52768
4.53333						2.40893	2.60972	2.53027	2.53023	3.11058	2.00848	2.00448	2.05001	2.65282	2.63	2.54216	2.58951	2.56575	2.96986	3.41335	2.35297	2.34541	2.34811	3.03075	2.52635
4.66667						2.52117	2.4926	2.44701	2.61723	3.07328	2.0825	2.06138	1.86558	2.6228	2.59858	2.64581	2.59298	2.45449	2.8048	3.35808	2.37181	2.41366	2.3256	2.89129	2.72727
4.8						2.46703	2.44878	2.45749	2.7017	3.08659	2.04734	2.06873	1.85229	2.5785	2.52996	2.64754	2.51183	2.53062	2.85894	3.27977	2.37437	2.47256	2.31369	2.79458	2.68459
4.93333						2.49948	2.38882	2.41121	2.69285	2.98813	2.09323	1.86917	1.95771	2.52314	2.48288	2.58017	2.52504	2.60613	2.88479	3.24779	2.38885	2.39597	2.43171	2.67717	2.64969
5.06667						2.42858	2.39406	2.43713	2.76389	3.04905	2.08311	1.93875	1.87809	2.50338	2.43868	2.5692	2.53601	2.5668	2.84353	3.19868	2.45935	2.37224	2.41146	2.66661	2.6496
5.2						2.49881	2.3232	2.36491	2.71497	3.06117	1.92928	1.96491	1.95421	2.47336	2.41693	2.55849	2.64744	2.4578	2.94386	3.11713	2.42198	2.42768	2.42202	2.82262	2.83115
5.33333						2.41134	2.34757	2.32052	2.66132	3.00264	2.02758	1.91347	1.85635	2.41545	2.37423	2.47284	2.59425	2.5881	2.98133	3.10042	2.38745	2.44248	2.48166	2.67869	2.84259
5.46667						2.31444	2.47073	2.24187	2.66811	2.9308	1.92452	1.90213	1.93641	2.38096	2.34171	2.49634	2.50254	2.63507	2.67136	3.04414	2.5652	2.42155	2.36092	2.76189	2.76994
5.6						2.34632	2.28242	2.33969	2.68226	2.84852	1.88996	1.89155	1.96406	2.3581	2.26604	2.61709	2.50877	2.4567	2.65542	3.00211	2.44844	2.39706	2.54697	2.88707	2.77319
5.73333						2.33161	2.26691	2.32876	2.64536	2.93691	1.8157	2.02255	1.87465	2.30259	2.24902	2.52439	2.48268	2.55321	2.56044	2.92857	2.53748	2.4365	2.464	2.82389	2.7681
5.86667						2.34831	2.29483	2.2672	2.60537	2.92024	1.89081	1.84316	1.95259	2.25677	2.22802	2.5138	2.54992	2.47921	2.53803	2.9421	2.46872	2.41661	2.56354	2.79576	2.73311
6						2.24808	2.20571	2.40822	2.62465	2.93356	1.8796	1.87927	1.87335	2.21085	2.232	2.52101	2.52558	2.4592	2.42861	2.96709	2.46563	2.48029	2.48867	3.14072	2.72292
6.13333						2.27953	2.2638	2.2807	2.55109	2.98321	1.92142	1.76771	1.93811	2.20795	2.15754	2.52369	2.58922	2.35974	2.40284	2.81725	2.49946	2.47642	2.47434	3.22477	2.74839
6.26667						2.27672	2.38438	2.14495	2.54508	2.97397	1.89498	1.84911	1.85611	2.16991	2.1087	2.53151	2.4466	2.46016	2.52907	2.81244	2.4112	2.59055	2.44754	2.87018	2.73027
6.4						2.27074	2.17891	2.32035	2.47546	2.94339	1.86554	1.83498	1.88097	2.12683	2.07804	2.42485	2.53164	2.47487	2.50902	2.91807	2.49033	2.50325	2.47541	2.77591	2.71098
6.53333						2.27399	2.1681	2.30947	2.39716	2.88007	1.85213	1.83268	1.88595	2.07817	2.07094	2.42412	2.43313	2.54267	2.46384	2.82492	2.49769	2.48084	2.49433	2.67075	2.73169
6.66667						2.10304	2.30679	2.23032	2.40079	2.81794	1.72053	1.95174	1.87291	2.05806	2.05427	2.39595	2.49082	2.49672	2.46807	2.75413	2.52628	2.47061	2.4753	2.79111	2.72267
6.8						2.15852	2.12407	2.25528	2.40774	2.78556	1.82676	1.94146	1.7853	2.02118	1.97296	2.51215	2.35849	2.4913	2.51562	2.70165	2.47519	2.58698	2.3917	2.84019	2.63357
6.93333						2.16223	2.17368	2.19228	2.37961	2.69333	1.85909	1.81711	1.86192	2.00772	1.96944	2.3868	2.48581	2.48691	2.55185	2.69575	2.48639	2.44047	2.52183	2.73511	2.6694
7.06667						2.12392	2.1907	2.21256	2.35772	2.719	1.84952	1.74948	1.90524	1.96729	1.96088	2.49594	2.33855	2.48893	2.48961	2.65322	2.43213	2.51969	2.47976	2.7243	2.59591
7.2						2.1613	2.12023	2.12713	2.18728	2.65963	1.84485	1.821	1.79486	1.9555	1.93641	2.37439	2.52317	2.40265	2.48463	2.59205	2.43672	2.49985	2.47782	2.67252	2.64384
7.33333						1.96409	2.18329	2.04411	2.1955	2.70772	1.7339	1.80624	1.92458	1.92264	1.89311	2.40559	2.48175	2.42998	2.53915	2.71633	2.40525	2.5507	2.45404	2.56804	2.6248
7.46667						1.97254	2.13095	2.07784	2.20253	2.65052	1.8218	1.92334	1.69372	1.92508	1.89105	2.53766	2.42941	2.31541	2.57189	2.65803	2.43298	2.52258	2.39598	2.64135	2.62363
7.6						1.98169	2.06349	2.05704	2.2407	2.6113	1.68462	1.87148	1.86305	1.84548	1.83441	2.52543	2.29826	2.42926	2.66936	2.74367	2.51292	2.44413	2.36265	2.66002	2.65411
7.73333						1.92343	2.14343	2.02413	2.1778	2.59187	1.6567	1.81892	1.88332	1.83583	1.82706	2.44607	2.30568	2.45438	2.79074	2.80872	2.49368	2.41048	2.37696	2.55224	2.6704
7.86667						2.08806	1.92154	2.07506	2.1228	2.56093	1.85894	1.82148	1.64231	1.84436	1.8116	2.41574	2.44187	2.31112	2.70808	2.80898	2.4692	2.47884	2.3197	2.60976	2.4815
8						2.14903	1.95422	1.96894	2.13354	2.55001	1.78267	1.76179	1.75032	1.82379	1.78039	2.36539	2.38322	2.367	2.74966	2.76814	2.44336	2.41854	2.37231	2.54532	2.38956
8.13333						1.97127	2.11315	1.99239	2.12438	2.49376	1.85355	1.72607	1.71618	1.80525	1.80027	2.36289	2.33914	2.37266	2.55322	2.79202	2.3762	2.42081	2.40819	2.54709	2.49837
8.26667						2.04091	2.12749	1.89731	2.1401	2.4296	1.73245	1.7205	1.79374	1.76096	1.74801	2.35286	2.35405	2.34094	2.15387	2.78223	2.51943	2.33285	2.32223	2.57429	2.42405
8.4						1.99793	2.03914	2.016	2.09475	2.41401	1.75324	1.81871	1.66897	1.75217	1.72767	2.3947	2.2912	2.31441	2.16631	2.78788	2.42409	2.42092	2.29108	2.59811	2.33269
8.53333						1.9567	1.99355	2.08587	2.0595	2.36412	1.72125	1.73376	1.75824	1.70707	1.73673	2.20809	2.34601	2.38564	2.21051	2.73	2.28274	2.30845	2.50631	2.59887	2.29887
8.66667						1.9609	1.99117	2.08323	2.01083	2.24742	1.68596	1.67933	1.8105	1.7031	1.67345	2.32444	2.23072	2.34672	2.15312	2.79995	2.27671	2.38939	2.38639	2.56018	2.35791
8.8						1.99733	1.98266	2.04891	2.03414	2.26913	1.65324	1.69637	1.8115	1.6996	1.67868	2.28578	2.27635	2.29223	2.02515	2.72207	2.23771	2.45348	2.32591	2.53062	2.26889
8.93333						2.00342	2.00361	2.00363	1.97432	2.2449	1.70452	1.68253	1.74488	1.66384	1.66524	2.2611	2.28973	2.27835	2.01568	2.63323	2.33253	2.32819	2.32207	2.48121	2.32994
9.06667						1.97197	1.94504	2.09281	1.94998	2.23411	1.74298	1.79353	1.56722	1.64576	1.70144	2.21723	2.27394	2.27753	1.98792	2.6825	2.2713	2.40447	2.26291	2.49033	2.38856
9.2						1.97284	1.89938	2.02414	1.94342	2.17906	1.75051	1.67912	1.66597	1.64692	1.67128	2.18265	2.27178	2.30736	1.90888	2.69777	2.17213	2.31784	2.40773	2.44134	2.21144
9.33333						2.06769	1.9532	1.85908	1.90383	2.11082	1.76463	1.60322	1.72448	1.64576	1.64289	2.28417	2.27229	2.18465	1.81028	2.73988	2.36909	2.34044	2.16111	2.3899	2.28843
10						2.03851	1.83675	1.91755	1.90138	2.12485	1.67744	1.67693	1.67572	1.63118	1.61595	2.20682	2.22176	2.20245	1.95942	2.67955	2.35536	2.15283	2.28426	2.34699	2.282
						#1	#2	#3	#4	#5	#1	#2	#3	#4	#5	#1	#2	#3	#4	#5	#1	#2	#3	#4	#5
