# Supplementary material for: Toxoplasma bradyzoites exhibit physiological plasticity of calcium and energy stores controlling motility and egress
Source: eLife. 2021 Dec 3;10:e73011. doi: 10.7554/eLife.73011 (PMC8683080; doi:10.7554/eLife.73011)
Supplement: Figure 3—source data 3. [file elife-73011-fig3-data3.xlsx]

## Sheet: Sheet1
Figure 3E	Zarpinst induced calcium reponses in GCaMP6f BAG1-mCherry tachyzoites and bradyzoites
		GCaMP6f fluorescence intensity fold changes (F/F0)
	Time (min)	Tachyzoites-A23187					Tachyzoites-zaprinast					Bradyzoites-A23187					Bradyzoites-zaprinast
	0	1	1	1	1	1	1	1	1	1	1	1	1	1	1	1	1	1	1	1	1
	0.145	1.10487	0.929525	1.07802	1.15891	0.9711	1.01615	0.885958	1.00845	1.0155	0.960276	1.05575	1.05479	0.966227	0.986001	0.999274	1.15365	0.922991	0.98897	0.964182	0.991805
	0.29	1.04887	1.00677	0.957207	0.895811	1.03468	1.00364	0.910139	1.1309	1.24274	0.848768	1.0291	0.951609	1.01417	0.981151	0.977596	1.03266	0.906303	0.978492	1.01961	0.992216
	0.435	1.0808	1.05204	1.00409	1.03856	1.01261	1.03408	1.01981	1.04447	0.833962	1.28082	1.00251	0.99087	1.0353	0.977949	0.98458	0.986475	1.02283	0.996542	1.01672	0.977295
	0.58	0.995792	0.967422	1.12008	1.01863	1.07895	1.02545	1.06119	1.03253	0.990435	1.3283	0.963003	1.04085	1.01616	1.00796	0.971066	1.01103	0.778455	1.07496	1.02317	1.00725
	0.725	1.02607	0.950154	1.10019	1.06304	1.01182	1.03341	1.11658	0.992723	1.05072	1.21841	1.01423	1.01016	1.01358	0.995791	0.960635	0.995455	0.939021	1.08582	1.07389	1.05592
	0.87	2.54543	2.60434	2.77767	2.58	2.64248	1.19763	1.15863	1.06282	1.04997	1.47123	1.15732	1.04229	0.961867	1.02498	1.01079	0.993475	1.1018	1.12601	1.12051	1.10265
	1.015	3.21099	3.0021	3.10787	3.09803	3.12192	1.46029	1.36531	1.21973	1.12065	1.367	1.17849	1.08643	1.14849	1.03532	0.986395	1.00109	1.18128	1.14937	1.1261	1.13586
	1.16	3.40157	3.46203	3.51015	3.441	3.49232	2.56919	2.43803	2.42031	2.5818	2.46422	1.23475	1.22226	1.21819	1.8493	1.78612	1.30798	0.997039	1.16563	1.13522	1.20274
	1.305	3.57777	3.57012	3.57674	3.57625	3.5976	2.9344	2.76028	2.76866	2.961	2.81814	1.37538	1.25278	1.36002	2.16836	2.13705	1.38825	1.02666	1.18003	1.32431	1.2105
	1.45	3.588	3.60226	3.59065	3.60065	3.63125	2.98933	3.00323	2.88996	2.90617	2.9792	1.54428	1.51344	1.54337	2.282	2.34658	1.15143	1.39419	1.63969	1.43224	1.31514
	1.595	3.61493	3.67081	3.44103	3.48656	3.56946	2.93652	3.0473	3.06776	2.81495	3.31583	1.64165	1.62332	1.61778	2.34175	2.5824	1.64492	1.404	1.64163	1.60948	1.41992
	1.74	3.45649	3.55283	3.47611	3.46586	3.48884	3.04872	2.9535	2.9729	2.94288	2.96754	1.63524	1.57525	1.76786	2.38302	2.7161	1.25976	1.55992	1.71734	1.74591	1.56548
	1.885	3.53119	3.48438	3.32095	3.42252	3.529	3.01012	2.77749	2.89551	2.77469	2.88621	1.71437	1.69877	1.67586	2.39382	2.84662	1.53491	1.50805	1.73761	1.78136	1.66116
	2.03	3.30342	3.30321	3.45647	3.33645	3.36313	2.9512	2.74065	2.83451	3.02598	2.65517	1.70433	1.81472	1.78098	2.42255	2.90993	1.64633	1.52804	1.75585	1.79966	1.71633
	2.175	3.19625	3.31586	3.27823	3.26922	3.26139	2.6702	2.74836	2.84092	2.80082	2.71794	1.91203	1.9049	1.84633	2.48971	3.01088	1.70094	1.86392	1.78097	1.87404	1.84951
	2.32	3.18923	3.22462	3.15801	3.29972	3.19826	2.65496	2.73277	2.82089	2.73659	2.53395	1.91442	1.91193	1.87832	2.61625	3.0097	1.98209	1.82275	1.8626	1.97458	1.90582
	2.465	3.1267	3.11172	3.09793	3.15601	3.16168	2.69398	2.73531	2.73399	2.94434	2.50324	2.01671	1.88522	2.01524	2.75039	3.05669	2.27488	1.98869	1.91846	2.01585	1.93146
	2.61	3.02994	3.16204	3.06831	3.16326	3.02669	2.60588	2.67909	2.59869	2.83625	2.42549	1.91093	2.06828	2.01827	2.82011	3.04834	2.23127	2.24044	2.07877	2.1127	2.14409
	2.755	3.06142	3.04547	3.08022	3.06932	3.06302	2.61953	2.57177	2.5509	2.55107	2.35368	2.12082	2.01489	1.98317	2.91317	3.10603	2.16514	2.19812	2.21838	2.13455	2.15159
	2.9	3.04833	3.04032	3.07132	3.01095	3.07918	2.72264	2.53425	2.54025	2.77387	2.30194	1.99003	2.16854	2.11676	3.06313	3.07809	2.32479	2.30597	2.42881	2.17699	2.21721
	3.045	3.06693	3.0005	2.91103	3.09237	2.97702	2.51759	2.52941	2.55188	2.54428	2.25181	2.19968	2.15528	2.07501	3.06387	3.04807	2.17435	2.28925	2.36677	2.19216	2.46961
	3.19	2.89855	2.92063	2.97185	2.91307	2.92598	2.3514	2.5325	2.54056	2.54268	2.1675	2.16841	2.20142	2.18297	3.02342	2.9493	2.40527	2.0127	2.33907	2.44903	2.27249
	3.335	2.90938	2.92653	2.81184	2.89482	2.89578	2.37988	2.34001	2.40142	2.33871	2.09025	2.24041	2.17386	2.22403	2.95818	2.90694	2.13676	2.14565	2.29068	2.20705	2.24385
	3.48	2.8874	2.87294	2.85919	2.89294	2.7849	2.37201	2.27259	2.35762	2.22323	2.08772	2.21581	2.22793	2.24278	2.88142	2.84399	2.0964	2.16245	2.24016	2.11101	2.22894
	3.625	2.98971	2.77198	2.84252	2.7389	2.7519	2.36971	2.25253	2.18202	2.13846	1.97638	2.27623	2.09879	2.32157	2.81782	2.76444	2.11537	2.10616	2.17069	2.45333	2.16099
	3.77	#1	#2	#3	#4	#5	#1	#2	#3	#4	#5	2.1329	2.20972	2.33488	2.63611	2.66875	2.00799	2.12038	2.16161	2.08572	2.12731
	3.915											2.24214	2.12885	2.26814	2.60225	2.57197	2.32746	2.07697	2.15535	2.17492	2.10064
	4.06											2.16998	2.23858	2.15373	2.49145	2.48571	2.19208	2.06828	2.14632	2.20294	2.09699
	4.205											2.16379	2.19816	2.17224	2.45677	2.3717	2.07968	2.03326	2.10784	2.35837	2.0918
	4.35											2.15436	2.20493	2.09494	2.43828	2.4078	2.02536	2.00841	2.09599	2.03072	2.07996
	4.495											2.11082	2.17022	2.13888	2.37167	2.26694	2.01567	1.9963	2.0879	2.06477	2.03399
	4.64											2.03757	2.19584	2.16674	2.39775	2.22748	1.99467	1.93924	2.07374	2.01985	2.01817
	4.785											2.19322	2.12627	2.02255	2.34386	2.13506	1.99455	1.92799	2.06172	1.9604	1.99083
	4.93											2.11285	1.98464	2.15076	2.33864	2.05751	1.98133	1.90476	2.03594	2.13077	1.98415
	5.075											2.01896	2.08377	2.095	2.22298	1.88816	1.93967	1.89774	2.01666	2.15592	1.98109
	5.22											1.97728	2.12159	1.95281	2.14164	1.85506	1.9361	1.89441	2.00731	1.81415	1.97665
	5.365											1.91906	2.13253	2.09144	2.11364	1.76136	1.92275	1.88506	1.99156	2.28194	1.94937
	5.51											2.10917	2.06048	1.93136	2.10861	1.69288	1.91762	1.87749	1.98746	2.27536	1.93647
	5.655											2.03744	1.98455	2.0091	2.03715	1.64698	1.91473	1.8703	1.98646	2.2409	1.86314
	5.8											1.88027	1.93846	1.90594	2.01894	1.56472	1.90053	1.84963	1.97522	2.08395	1.78891
	5.945											1.99665	1.82242	1.93323	1.97795	1.48426	1.87007	1.83281	1.9669	2.06307	1.75063
	6.09											1.94951	1.84206	1.96584	1.80593	1.44481	1.86162	1.77534	1.94858	2.03234	1.74473
	6.235											2.09821	1.8703	1.95774	1.77061	1.4361	1.82822	1.76937	1.94038	2.01795	1.73968
	6.38											1.91238	1.98965	1.79255	1.84106	1.38095	1.8267	1.75632	1.93809	1.94145	1.67899
	6.525											1.80756	1.89672	2.00127	1.76082	1.91918	1.80051	1.72542	1.90962	1.92373	1.67622
	6.67											2.00588	1.92232	1.96296	1.69183	1.92862	1.73727	1.71342	1.90749	1.92134	1.65788
	6.815											1.74786	1.74992	1.91468	1.69897	1.84444	1.67433	1.70239	1.90251	1.91584	1.62556
	6.96											1.87418	1.90638	1.94239	1.68414	1.8215	1.65037	1.66662	1.89938	1.91215	1.60403
	7.105											1.9474	1.82178	1.83203	1.64974	1.73107	1.64246	1.63771	1.89719	1.88463	1.57536
	7.25											1.85497	1.84353	1.86806	1.67142	1.65315	1.62179	1.62855	1.89509	1.87512	1.53886
	7.395											2.00199	2.10837	1.86803	1.63519	1.68018	1.62103	1.59098	1.88034	1.86038	1.51554
	7.54											1.85181	1.98613	1.90033	1.59374	1.61297	1.62085	1.57489	1.87429	1.84173	1.49779
	7.685											1.81705	1.97477	1.87661	1.64105	1.18222	1.59916	1.54467	1.87423	1.83367	1.48552
	7.83											1.97193	1.91131	1.89663	1.61296	1.17905	1.56638	1.53603	1.85026	1.83312	1.47434
	7.975											1.81639	1.85414	1.8292	1.65807	1.21252	1.54436	1.52333	1.84735	1.82985	1.44287
	8.12											1.73059	1.78586	1.92459	1.68186	1.14249	1.48912	1.51457	1.83785	1.82859	1.42493
	8.265											1.88185	1.91634	1.81876	1.64205	1.18576	1.45972	1.49713	1.82696	1.82592	1.42311
	8.41											1.78803	1.82522	1.90883	1.64763	1.17424	1.45712	1.47188	1.825	1.82067	1.41919
	8.555											1.88064	1.74926	1.84814	1.6685	1.21043	1.43451	1.4602	1.82267	1.80469	1.41135
	8.7											1.89842	1.96001	1.72834	1.60801	1.20082	1.42701	1.43765	1.80166	1.79701	1.40965
	8.845											1.79808	1.88603	1.82549	1.57132	1.18685	1.41885	1.43172	1.78797	1.78868	1.40741
	8.99											1.76208	1.87584	1.77559	1.60609	1.17288	1.41522	1.42281	1.78793	1.7746	1.37275
	9.135											1.75991	1.784	1.8191	1.60344	1.23401	1.37425	1.4156	1.76588	1.7693	1.36872
	9.28											1.77114	1.75731	1.82895	1.6437	1.18304	1.36278	1.37644	1.75768	1.7158	1.34794
	9.425											1.79088	1.68641	1.85183	1.6179	1.18449	1.33876	1.36512	1.70651	1.66014	1.33515
	9.57											1.74461	1.75181	1.76441	1.67481	1.25914	1.25454	1.35006	1.65775	1.6562	1.31831
	9.715											1.71495	1.77811	1.75485	1.60435	1.24308	1.2526	1.34847	1.56753	1.64918	1.28833
	10											1.80145	1.65367	1.79088	1.60006	1.23646	1.22905	1.3173	1.5003	1.59688	1.26435
												#1	#2	#3	#4	#5	#1	#2	#3	#4	#5
