# Supplementary material for: Toxoplasma bradyzoites exhibit physiological plasticity of calcium and energy stores controlling motility and egress
Source: eLife. 2021 Dec 3;10:e73011. doi: 10.7554/eLife.73011 (PMC8683080; doi:10.7554/eLife.73011)
Supplement: Figure 3—source data 4. [file elife-73011-fig3-data4.xlsx]

## Sheet: Sheet1
Figure 3G	Motility of parasites within parasitophorous vacuole or cyst
		% of motile parasites in each vacuole or cyst after agonist stimultion
				Tachy	Brady	Tachy	Brady
			A23187	+	+	-	-
			zaprinast	-	-	+	+
			Independent Experiment 1	100	52	100	60
				100	65	100	77.58
				100	60	100	46
				100	53.85	100	78.33
				100	42.27	100	37
			Independent Experiment 2	100	67.5	100	75
				100	80	100	25.2
				100	55	100	80
				100	62.6	100	62
				100	75	100	50
				100	100	100	52
				100	85	100	90
		Two-tailed Mann-Whitney test
		Table Analyzed	1					Table Analyzed	2
		Brady treated with A23187	Brady treated with A23187					Brady treated with zaprinast	Brady treated with zaprinast
		vs.	vs.					vs.	vs.
		Tachy treated with A23187	Tachy treated with A23187					Tachy treated with zaprinast	Tachy treated with zaprinast
		Mann Whitney test						Mann Whitney test
		P value	<0.0001					P value	<0.0001
		Exact or approximate P value?	Exact					Exact or approximate P value?	Exact
		P value summary	****					P value summary	****
		Significantly different (P < 0.05)?	Yes					Significantly different (P < 0.05)?	Yes
		One- or two-tailed P value?	Two-tailed					One- or two-tailed P value?	Two-tailed
		Sum of ranks in column E,F	216 , 84					Sum of ranks in column G,H	222 , 78
		Mann-Whitney U	6					Mann-Whitney U	0
		Difference between medians						Difference between medians
		Median of column E	100.0, n=12					Median of column G	100.0, n=12
		Median of column F	63.80, n=12					Median of column H	61.00, n=12
		Difference: Actual	-36.2					Difference: Actual	-39
		Difference: Hodges-Lehmann	-36.2					Difference: Hodges-Lehmann	-39
			Tachy treated with A23187	Brady treated with A23187	Tachy treated with zaprinast	Brady treated with zaprinast
		Number of values	12	12	12	12
		Minimum	100	42.27	100	25.2
		Maximum	100	100	100	90
		Range	0	57.73	0	64.8
		Mean	100	66.52	100	61.09
		Std. Deviation	0	16.15	0	19.68
		Std. Error of Mean	0	4.662	0	5.681
