# Supplementary material for: Toxoplasma bradyzoites exhibit physiological plasticity of calcium and energy stores controlling motility and egress
Source: eLife. 2021 Dec 3;10:e73011. doi: 10.7554/eLife.73011 (PMC8683080; doi:10.7554/eLife.73011)
Supplement: Figure 4—figure supplement 1—source data 1. [file elife-73011-fig4-figsupp1-data1.xlsx]

## Sheet: Figure 4-figure supplement 1
Figure 4-figure supplement 1 Calcium responses by extracellular tachyzoites and in vitro produced tissue cysts
	GCaMP6f fluorescence intensity fold changes (F/F0)
Time (min)	Extracellular tachyzoites-A23187					Extracellular in vitro cyst-A23187					Extracellular in vitro cyst-zaprinast
0	1	1	1	1	1	1	1	1	1	1	1	1	1	1	1
0.05	1.00188	1.03485	1.00346	1.00583	0.960709	0.969364	1.03555	0.99431	0.758122	1.01395	0.887038	0.971473	1.11007	0.997243	1.14228
0.1	1.00246	0.994428	0.98331	1	0.99839	0.871198	1.06432	1.00262	1.07465	0.954621	0.959592	1.06699	0.965788	0.905029	1.02086
0.15	0.990632	0.988922	0.995906	0.993423	0.963392	1.05437	0.863517	0.986568	0.86628	1.02555	0.889757	1.11929	0.940872	0.684886	1.272
0.2	1.02267	1.21551	1.14672	0.993547	0.916049	1.06219	0.985459	0.92509	1.1295	0.727499	0.916123	0.997427	1.10864	0.851417	1.15441
0.25	2.13536	2.21402	2.10752	0.982378	0.950188	0.990232	0.95356	1.00688	0.789612	1.13251	1.11119	1.23419	1.01258	1.07259	0.897989
0.3	2.83234	3.02561	3.01665	1.07334	1.05228	0.995499	0.994445	1.00241	1.08811	0.914392	1.11636	1.23063	1.09321	1.13005	1.1665
0.35	3.4683	3.54643	3.52145	1.12274	1.07751	0.995644	1.04892	0.999347	1.02868	1.11752	1.12626	1.24619	1.19931	1.12494	0.870998
0.4	3.63672	3.46765	3.56406	4.0041	4.14106	1.06602	1.08179	1.06892	0.815345	0.986687	1.3771	1.17736	1.19061	1.17762	1.09709
0.45	3.47283	3.46693	3.51482	4.12298	4.18486	1.15239	1.19081	1.16779	1.18549	1.16052	1.34308	1.38047	1.34059	1.21641	0.941083
0.5	3.529	3.48864	3.39433	4.11045	4.19088	1.34229	1.32967	1.27395	1.01001	1.14853	1.43752	1.48694	1.46515	1.2263	1.92184
0.55	3.43976	3.47426	3.45549	4.05609	4.13183	1.43903	1.45084	1.4284	1.36192	1.58504	1.49128	1.35753	1.59303	1.39645	1.21934
0.6	3.48039	3.41216	3.37732	3.90209	3.99581	1.66066	1.5566	1.47079	1.51713	1.62476	1.60413	1.40565	1.56759	1.42976	1.22236
0.65	3.25533	3.30721	3.47474	3.85344	3.90778	1.74552	1.65522	1.69531	1.47855	1.75715	1.46865	1.66122	1.441	1.45302	2.50473
0.7	3.23028	3.32357	3.36809	3.69819	3.77026	1.7289	1.69571	1.74054	1.533	1.76397	1.5661	1.56678	1.55707	1.54422	2.54263
0.75	3.41343	3.20875	3.21274	3.61306	3.68717	1.73697	1.74351	1.77554	1.70556	1.93843	1.51397	1.72604	1.5683	1.54556	2.64776
0.8	3.23929	3.22241	3.28123	3.55857	3.654	1.79467	1.80208	1.71397	1.72528	1.94327	1.74533	1.60518	1.72488	1.60085	2.18469
0.85	3.29476	3.21702	3.12754	3.37739	3.43017	1.72923	1.85933	1.77142	1.76332	1.9909	1.75475	1.84472	1.68247	1.64365	2.02412
0.9	3.17461	3.2042	3.19652	3.2796	3.4175	1.79228	1.76256	1.87453	1.80944	1.9932	1.78642	1.94666	1.79362	1.96889	2.29738
0.95	3.13622	3.14381	3.14043	3.03177	3.19141	1.86392	2.00791	1.91873	1.83549	2.09493	2.10661	2.0561	2.08409	2.3565	2.16169
1	3.10293	3.07403	3.09306	2.76682	2.81406	2.03644	1.98847	2.14734	1.838	2.33055	2.32508	2.39573	2.21448	2.27435	1.69159
1.05	2.98759	3.06445	3.00465	2.50807	2.57327	2.14047	2.1666	2.06291	1.91764	2.32568	2.59028	2.46701	2.56575	2.3767	1.41491
1.15						2.21817	2.19696	2.2902	1.94072	2.185	2.62061	2.54561	2.39649	2.48104	1.39117
1.3						2.05568	1.97802	2.06846	2.1795	2.43548	2.29532	2.29963	2.37886	2.32191	1.3557
1.5						1.82235	1.82657	1.82382	2.25668	2.55868	2.04738	1.8593	2.03544	2.07667	1.24838
1.65						1.66021	1.6932	1.77716	2.27081	2.53407	1.99924	2.0409	1.8266	2.14467	0.931529
1.75						1.59374	1.60815	1.59407	2.00018	2.42084	1.89111	1.98022	1.88062	2.10439	1.15476
1.9						1.5409	1.56364	1.47211	1.93967	2.34422	1.71544	1.72498	1.72088	1.73659	1.15132
2						1.50482	1.54548	1.55702	1.81085	2.43648	1.64999	1.44508	1.47791	1.51862	1.04928
2.15						1.55284	1.63671	1.67995	1.47545	2.30545	1.44543	1.41872	1.29981	1.39787	0.895223
2.25						1.43307	1.52739	1.54733	1.30896	2.2903	1.35097	1.31993	1.1554	0.857693	0.855669
	#1	#2	#3	#4	#5	#1	#2	#3	#4	#5	#1	#2	#3	#4	#5
