# Supplementary material for: Toxoplasma bradyzoites exhibit physiological plasticity of calcium and energy stores controlling motility and egress
Source: eLife. 2021 Dec 3;10:e73011. doi: 10.7554/eLife.73011 (PMC8683080; doi:10.7554/eLife.73011)
Supplement: Figure 4—source data 1. [file elife-73011-fig4-data1.xlsx]

## Sheet: Sheet1
Figure 4C GCaMP6f fluorescence intensity changes vs time of GCaMP6f BAG1-mCherry tachyzoites and bradyzoites cultured in C2C12 muscle cells in response to calcium agonists
		GCaMP6f fluorescence intensity fold changes
	Time (min)	Tachyzoites-zaprinast					Bradyzoites-A23187					Bradyzoites-zaprinast					Tachyzoites-A23187
	0	1	1	1	1	1	1	1	1	1	1	1	1	1	1	1	1	1	1	1	1
	0.2	0.967607	0.982025	0.946612	0.985001	1.00835	0.969461	0.932669	1.01573	1.02465	0.967861	1.09306	0.997796	0.883237	0.991982	0.999331	0.94359	1.09285	1.03326	0.963454	0.973455
	0.4	1.01845	1.02085	0.899839	0.997205	0.99112	0.928378	1.00273	0.956592	0.99081	0.971733	1.04189	0.943504	0.992983	0.993273	0.990215	1.01312	0.902063	1.05606	0.97468	0.972182
	0.6	1.11013	0.923792	0.964628	1.05469	1.00413	0.920586	1.08222	0.959539	1.0142	0.984898	0.87389	0.995954	1.11492	0.87356	0.913273	1.09205	0.963235	1.06737	0.972001	0.966727
	0.8	1.16629	1.04972	0.985332	1.46702	1.38861	1.05748	0.911702	1.07058	0.99269	0.912488	0.94587	1.05671	0.990682	0.846097	0.892866	1.02686	1.15292	1.01081	0.960138	0.943273
	1	1.31251	1.38444	1.33831	1.8447	1.77607	1.03789	1.05771	0.991118	1.07456	1.02246	1.02748	1.08323	0.883911	0.831168	0.877896	1.08004	1.07524	1.07899	0.959436	0.938424
	1.2	2.09377	2.14151	2.11203	2.34582	2.22806	1.15298	1.24989	1.15909	1.38889	1.37928	1.00937	1.0129	1.01397	0.822781	0.885925	1.0918	1.10453	1.12669	0.907711	0.953758
	1.4	3.35003	3.18005	3.25096	2.73877	2.62907	1.44675	1.39644	1.5346	2.1652	2.20755	1.12644	1.08941	0.950347	0.803981	0.881659	1.05031	1.09004	1.02991	0.955035	0.953697
	1.6	3.22928	3.38518	3.30574	3.16806	3.08379	2.44598	2.60494	2.48294	2.97849	2.99109	1.13863	1.01583	1.2398	0.821307	0.885674	1.17908	1.23384	1.18797	1.0176	0.89697
	1.8	3.4057	3.18467	3.266	3.54817	3.53279	2.95059	2.92031	2.87188	3.62824	3.62188	1.23252	1.32907	1.16013	0.83596	0.903069	1.2637	1.41342	1.28429	1.14931	0.986061
	2	3.23988	3.36831	3.21941	3.70198	3.82645	2.95607	2.96037	3.05086	3.76859	3.703	1.35104	1.42756	1.38613	0.828126	0.976165	1.55285	1.38334	1.42465	1.39575	1.21309
	2.2	3.25437	3.29305	3.29294	3.75023	3.84517	2.97747	2.99005	3.00755	3.67063	3.61181	1.43713	1.56787	1.64717	0.875956	1.1855	1.51041	1.56602	1.7136	1.50679	1.32194
	2.4	3.28955	3.28864	3.17419	3.69536	3.77475	2.97478	3.0214	2.99339	3.57164	3.53398	1.68491	1.65213	1.70122	0.983412	1.49176	1.70322	1.8196	1.83805	1.63123	1.42309
	2.6	3.15317	3.37303	3.19219	3.53745	3.62467	2.97279	2.86998	2.98117	3.43066	3.29313	1.82569	1.83804	1.7695	1.08091	1.80438	2.16343	2.16882	2.19814	1.54334	1.35782
	2.8	3.21383	3.25809	3.16256	3.32131	3.34245	2.79303	2.9374	2.99651	3.12176	3.16922	2.062	1.92004	1.96369	1.18579	1.94204	2.0764	2.207	2.19298	1.67702	1.32964
	3	3.19455	3.21753	3.19157	3.1035	3.20353	2.87114	2.84833	2.83746	2.98475	2.90203	2.08994	2.00133	2.15256	1.3419	2.04642	2.22467	2.13657	2.26527	1.71522	1.33521
	3.2	3.06955	3.13715	3.13716	3.08059	3.12959	2.78857	2.87371	2.76739	2.63033	2.64105	2.20943	2.10072	2.25849	1.55138	2.26528	2.25225	2.22576	2.23688	2.26181	2.11085
	3.4	3.03859	3.18411	3.09598	3.0967	3.06638	2.76894	2.79542	2.78177	2.46053	2.35683	2.27514	2.28381	2.20612	1.87301	2.54495	2.28964	2.21446	2.22775	2.96556	2.89
	3.6	3.06822	2.95028	3.0739	3.04174	3.08686	2.75205	2.72032	2.68507	2.17836	2.05537	2.37052	2.30364	2.24787	2.0752	2.81768	2.24767	2.23974	2.24389	2.91938	2.7523
	3.8	#1	#2	#3	#4	#5	2.63396	2.69057	2.63238	1.91583	1.92217	2.27541	2.43823	2.41199	2.3055	3.01631	2.21999	2.30573	2.17885	2.79495	2.66115
	4						#1	#2	#3	#4	#5	2.44323	2.3769	2.31995	2.28053	3.11809	2.24625	2.22902	2.2268	2.94107	2.74042
	4.2											2.40825	2.3354	2.40802	2.30808	3.15924	2.1875	2.32696	2.14348	3.09197	2.80921
	4.4											2.40293	2.3692	2.3882	2.35527	3.19461	2.16916	2.23004	2.38914	3.23605	2.80764
	4.6											2.42864	2.33722	2.40582	2.35462	3.17488	2.14586	2.17109	2.19307	3.43319	2.81636
	4.8											2.35915	2.39796	2.41026	2.35278	3.22915	2.1099	2.11019	2.12045	3.48747	2.52539
	5											2.35218	2.35144	2.34676	2.39803	3.32207	2.08627	2.10844	2.10859	3.36507	2.44218
	5.2											2.41541	2.33359	2.25354	2.35112	3.41599	2.02382	2.18986	2.04207	3.212	2.43442
	5.4											2.2894	2.28923	2.28873	2.33214	3.51593	2.04544	2.24392	2.21632	3.14414	2.30406
	5.6											2.40596	2.24781	2.20579	2.38384	3.62917	2.18805	2.1105	2.17063	3.19121	2.25667
	5.8											2.28949	2.37906	2.18423	2.40227	3.64548	2.24159	2.19147	2.04641	3.17272	2.25982
	6											2.33928	2.25697	2.16006	2.4312	3.66622	2.06185	2.13663	2.25129	3.10096	2.29745
	6.2											2.2665	2.08163	2.28482	2.37821	3.68144	2.14064	2.10463	2.16933	3.04784	2.32739
	6.4											2.20219	2.17998	2.20658	2.34181	3.68696	2.222	2.24224	2.08124	3.04541	2.23418
	6.6											2.26717	2.13939	2.14783	2.25058	3.65702	2.17224	2.21721	2.19264	3.12297	2.24552
	6.8											2.25229	2.12748	2.07868	2.24772	3.68278	2.10152	2.15988	2.18235	3.15543	2.16533
	7											2.15601	2.12662	2.1426	2.21749	3.71356	2.23591	2.06756	2.2717	3.17367	2.11461
												#1	#2	#3	#4	#5	#1	#2	#3	#4	#5
