# Supplementary material for: Toxoplasma bradyzoites exhibit physiological plasticity of calcium and energy stores controlling motility and egress
Source: eLife. 2021 Dec 3;10:e73011. doi: 10.7554/eLife.73011 (PMC8683080; doi:10.7554/eLife.73011)
Supplement: Figure 4—source data 2. [file elife-73011-fig4-data2.xlsx]

## Sheet: Sheet1
Figure 4D	Time of tachyzoites and bradyzoites to reach GCaMP6f fluorescence peak in response to calcium agonists
			Time for reaching calcium peak levels (min)
				Tachy	Brady	Tachy	Brady		Table Analyzed	Data 1		Table Analyzed	Data 1
			A23187	+	+	-	-
			zaprinast	-	-	+	+		Column F	Bradyzoites-A23187		Column H	Bradyzoites-zaprinast
			Independent Experiment 1	0.56	4.67	1.12	2.5		vs.	vs.		vs.	vs.
				0.79	2.72	1.55	4		Column E	Tachyzoites-A23187		Column G	Tachyzoites-zaprinast
				0.97	3.67	0.8	5.08
				0.867	5.6	0.93	2.83		Unpaired t test			Unpaired t test
				0.626	4.17	0.5	3.21		P value	<0.0001		P value	<0.0001
			Independent Experiment 2	1.01	3.52	1.25	2.52		P value summary	****		P value summary	****
				0.92	3.68	1.47	2.14		Significantly different (P < 0.05)?	Yes		Significantly different (P < 0.05)?	Yes
				1.1	2.6	1.77	2.62		One- or two-tailed P value?	Two-tailed		One- or two-tailed P value?	Two-tailed
				1.08	3.2	1.65	3.4		t, df	t=9.209, df=18		t, df	t=6.121, df=18
				0.6	2.8	1.37	2.75
									How big is the difference?			How big is the difference?
				Two-tailed unpaired T-test					Mean of column E	0.8523		Mean of column G	1.241
									Mean of column F	3.663		Mean of column H	3.085
									Difference between means (E - F) ± SEM	2.811 ± 0.3052		Difference between means (G - H) ± SEM	1.844 ± 0.3012
									95% confidence interval	2.170 to 3.452		95% confidence interval	1.211 to 2.477
									R squared (eta squared)	0.8249		R squared (eta squared)	0.6755
									F test to compare variances			F test to compare variances
									F, DFn, Dfd	22.23, 9, 9		F, DFn, Dfd	4.568, 9, 9
									P value	<0.0001		P value	0.0336
									P value summary	****		P value summary	*
												Significantly different (P < 0.05)?	Yes
										Tachyzoites-A23187	Tachyzoites-zaprinast	Bradyzoites-A23187	Bradyzoites-zaprinast
									Number of values	10	10	10	10
									Minimum	0.56	0.5	2.6	2.1
									Maximum	1.1	1.77	5.6	5
									Range	0.54	1.27	3	2.9
									Mean	0.8523	1.241	3.663	3.085
									Std. Deviation	0.2003	0.4037	0.9441	0.8628
									Std. Error of Mean	0.06333	0.1277	0.2986	0.2729
