# Supplementary material for: Toxoplasma bradyzoites exhibit physiological plasticity of calcium and energy stores controlling motility and egress
Source: eLife. 2021 Dec 3;10:e73011. doi: 10.7554/eLife.73011 (PMC8683080; doi:10.7554/eLife.73011)
Supplement: Figure 4—source data 3. [file elife-73011-fig4-data3.xlsx]

## Sheet: Sheet1
Figure 4E	Motility of parasites within parasitophorous vacuole or cyst cultured in C2C12 muscle cells
			% of motile parasites in each vacuole or cyst						Two-tailed Mann-Whitney t test
				Tachy	Brady	Tachy	Brady		Table Analyzed	Data 1		Table Analyzed	Data 2
			A23187	+	+	-	-
			zaprinast	-	-	+	+		Column F	Bradyzoites treated with A23187		Column H	Bradyzoites treated with zaprinast
		Independent experiment #1		100	61.24	100	90.72		vs.	vs.		vs.	vs.
				100	43.55	100	24.12		Column E	Tachyzoites treated with A23187		Column G	Tachyzoites treated with zaprinast
				100	70.86	100	44.55
				100	49.24	100	32.25		Mann Whitney test			Mann Whitney test
				100	72.27	100	79.21		P value	0.0001		P value	<0.0001
		Independent experiment #2		100	88.13	100	63.73		Exact or approximate P value?	Exact		Exact or approximate P value?	Exact
				100	100	100	53.4		P value summary	***		P value summary	****
				100	50	100	50		Significantly different (P < 0.05)?	Yes		Significantly different (P < 0.05)?	Yes
				100	47.52	100	48.98		One- or two-tailed P value?	Two-tailed		One- or two-tailed P value?	Two-tailed
				100	75	100	60.6		Sum of ranks in column E,F	150 , 60		Sum of ranks in column G,H	155 , 55
									Mann-Whitney U	5		Mann-Whitney U	0
									Difference between medians			Difference between medians
									Median of column E	100.0, n=10		Median of column G	100.0, n=10
									Median of column F	66.05, n=10		Median of column H	51.70, n=10
									Difference: Actual	-33.95		Difference: Actual	-48.3
									Difference: Hodges-Lehmann	-33.95		Difference: Hodges-Lehmann	-48.3
										Tachyzoites treated with A23187	Bradyzoites treated with A23187	Tachyzoites treated with zaprinast	Bradyzoites treated with zaprinast
									Number of values	10	10	10	10
									Minimum	100	43.55	100	24.12
									Maximum	100	100	100	90.72
									Range	0	56.45	0	66.6
									Mean	100	65.78	100	54.76
									Std. Deviation	0	18.84	0	20.04
									Std. Error of Mean	0	5.957	0	6.336
