# Supplementary material for: Toxoplasma bradyzoites exhibit physiological plasticity of calcium and energy stores controlling motility and egress
Source: eLife. 2021 Dec 3;10:e73011. doi: 10.7554/eLife.73011 (PMC8683080; doi:10.7554/eLife.73011)
Supplement: Figure 4—source data 4. [file elife-73011-fig4-data4.xlsx]

## Sheet: Figure 4G
Fig 4G	Calcium responses of ex vivo cysts in response to calcium agonists
		GCaMP6f fluorescence intensity fold changes (F/F0)
	Time (min)	Tachyzoites-A23187					Bradyzoites-A23187					Bradyzoites-zaprinast
	0	1	1	1	1	1	1	1	1	1	1	1	1	1	1	1
	0.05	1.05944	0.979445	0.938051	0.984499	1.02003	0.870006	1.04483	1.07715	1.10733	1.05073	0.990013	1.02221	0.991065	1.10493	1.0797
	0.1	1.00076	1.0802	0.960124	0.992691	1.00839	1.10916	0.914394	0.923532	1.04729	0.97784	0.915131	0.991901	1.09857	1.09602	1.00806
	0.15	1.03634	1.0635	0.846259	1.00305	0.973758	0.987527	0.994689	0.988156	1.02683	0.842091	1.07466	1.00694	0.918727	0.924325	0.88064
	0.2	0.964143	1.00617	0.95904	0.968356	0.965839	0.963077	1.05774	0.952052	1.0488	1.12167	1.01779	0.989977	0.991714	0.980583	0.898364
	0.25	1.08334	1.01046	0.857824	1.21781	1.25707	1.06062	1.06109	0.884177	0.98323	1.0439	0.991341	0.965489	1.09401	1.06996	1.10188
	0.3	0.910822	0.947699	1.13672	1.75962	1.75163	1.04106	0.912679	1.046	0.958242	0.947456	0.896267	1.11475	1.08781	1.09416	0.95476
	0.35	1.02456	1.06483	0.996485	2.22255	2.27143	0.999844	1.00788	1.02996	1.12611	1.11303	1.05438	1.04927	1.04157	1.05559	1.25087
	0.4	3.06709	3.02616	3.11132	2.65681	2.72756	1.22181	1.17106	1.11525	1.09844	0.982439	1.16338	1.14269	1.17556	1.03405	1.01983
	0.45	3.03794	3.13886	3.16914	3.1163	3.21483	1.30509	1.28754	1.44955	1.07865	0.884739	1.41506	1.21874	1.34127	0.925788	0.971368
	0.5	3.61741	3.69251	3.66467	3.41973	3.59441	1.59631	1.53592	1.49815	1.07714	0.787596	1.51313	1.37818	1.34483	0.831095	0.762395
	0.55	3.81399	3.81883	3.80335	3.64798	3.84503	1.65622	1.4452	1.57901	1.14255	0.977143	1.57862	1.39193	1.40107	0.943344	0.83701
	0.6	3.68227	3.85311	3.73304	3.72275	3.97228	1.50736	1.6158	1.65621	1.22757	1.16906	1.46293	1.435	1.45424	1.03804	1.03533
	0.65	3.7707	3.60164	3.68224	3.60276	3.86056	1.5848	1.63348	1.64618	1.47375	1.23317	1.56187	1.57354	1.4928	1.08964	0.959593
	0.7	3.77121	3.67154	3.56921	3.52333	3.78385	1.76797	1.73969	1.76578	1.59936	1.49449	1.59855	1.6564	1.5758	1.3547	1.1615
	0.75	3.55924	3.56557	3.5447	3.43892	3.7177	1.93931	1.76757	1.94639	1.56062	1.28571	1.64189	1.74136	1.70899	1.21412	0.943356
	0.8	3.56789	3.51931	3.48267	3.31467	3.57974	2.08891	2.00556	2.19569	1.91464	1.5561	1.78275	1.8924	1.65532	1.56284	1.18889
	0.85	3.55497	3.34995	3.43236	3.2305	3.49697	2.14021	2.13967	2.13389	2.27838	1.94662	1.94474	1.83863	2.00835	1.81673	1.78111
	0.9	3.28459	3.31929	3.31805	3.13115	3.36856	2.26278	2.23246	2.1095	3.51652	2.84418	2.07525	2.07369	2.19378	2.73467	2.38597
	0.95	3.24645	3.12824	3.34022	3.0465	3.28991	2.25509	2.42489	2.32096	3.8697	3.53087	2.22505	2.28775	2.30708	3.17077	2.68295
	1	3.09983	3.1675	3.2056	2.99044	3.19922	2.47165	2.4833	2.42287	3.64213	2.92084	2.35255	2.34992	2.22759	2.90065	2.6791
	1.05	3.18151	3.23115	3.01665	2.92756	3.11258	2.63181	2.49447	2.65394	3.07932	2.43958	2.34195	2.3134	2.38175	2.85477	3.40283
	1.1	3.10848	3.1692	3.11885	2.82933	3.03005	2.80563	2.75862	2.7721	2.94533	2.41004	2.25701	2.39946	2.47846	2.35111	2.88907
	1.15	3.1436	3.13075	3.0531	2.73167	2.92554	2.77524	2.8139	2.81514	2.79255	2.39582	2.36137	2.38782	2.36206	2.3414	2.26549
	1.2	3.01236	2.89539	3.11928	2.65906	2.82795	2.83069	2.81051	2.79172	2.60154	2.20808	2.3649	2.32947	2.44591	2.29445	2.23389
	1.25	#1	#2	#3	#4	#5	2.7654	2.88448	2.81018	2.59618	2.04669	2.36262	2.29083	2.48148	2.13007	2.20377
	1.4						2.67833	2.61341	2.47133	2.22992	2.04	2.53828	2.47079	2.69705	2.00053	2.14378
	1.55						2.37993	2.40287	2.38582	2.06507	2.04	2.2236	2.16763	2.3652	1.90291	1.7857
	1.7						2.0466	1.98218	2.02008	2.06389	1.9593	1.66917	1.83133	1.59269	1.81474	1.73686
	1.85						1.9233	1.90399	1.85656	2.01459	1.94397	1.61703	1.60138	1.70427	1.68307	1.691
	2						1.73697	1.5902	1.59433	1.96696	1.68237	1.48947	1.50393	1.62924	1.6578	1.4679
	2.15						1.32617	1.44622	1.5385	1.91028	1.45031	1.28713	1.27085	1.4801	1.43397	1.40506
	2.3						1.37801	1.24647	1.43043	1.68506	1.34843	1.30215	1.30582	1.31379	1.22663	1.37977
	2.45						1.24355	1.38158	1.30039	1.50126	1.19261	1.2631	1.21904	1.23649	1.10866	1.36886
							#1	#2	#3	#4	#5	#1	#2	#3	#4	#5

## Sheet: Sheet1
12451	12880	12451	12880	1	1
12258	13138	12451	12880	0.984499	1.02003
12360	12988	12451	12880	0.992691	1.00839
12489	12542	12451	12880	1.00305	0.973758
12057	12440	12451	12880	0.968356	0.965839
15163	16191	12451	12880	1.21781	1.25707
21909	22561	12451	12880	1.75962	1.75163
27673	29256	12451	12880	2.22255	2.27143
33080	35131	12451	12880	2.65681	2.72756
38801	41407	12451	12880	3.1163	3.21483
42579	46296	12451	12880	3.41973	3.59441
45421	49524	12451	12880	3.64798	3.84503
46352	51163	12451	12880	3.72275	3.97228
44858	49724	12451	12880	3.60276	3.86056
43869	48736	12451	12880	3.52333	3.78385
42818	47884	12451	12880	3.43892	3.7177
41271	46107	12451	12880	3.31467	3.57974
40223	45041	12451	12880	3.2305	3.49697
38986	43387	12451	12880	3.13115	3.36856
37932	42374	12451	12880	3.0465	3.28991
37234	41206	12451	12880	2.99044	3.19922
36451	40090	12451	12880	2.92756	3.11258
35228	39027	12451	12880	2.82933	3.03005
34012	37681	12451	12880	2.73167	2.92554
33108	36424	12451	12880	2.65906	2.82795
