# Supplementary material for: Toxoplasma bradyzoites exhibit physiological plasticity of calcium and energy stores controlling motility and egress
Source: eLife. 2021 Dec 3;10:e73011. doi: 10.7554/eLife.73011 (PMC8683080; doi:10.7554/eLife.73011)
Supplement: Figure 4—source data 5. [file elife-73011-fig4-data5.xlsx]

## Sheet: Sheet1
Figure 4H	Motility and egress of bradyzoites within ex vivo cysts isolated from choronically ifected mice in response to A23187
			% of motile parasites		% of egress
			A23187	Zaprinast	A23187	Zaprinast
			100	100	0	0
			100	100	0	0
			100	100	0	0
			100	100	0	0
			100	100	0	0
			100	100	0	0
