# Supplementary material for: Toxoplasma bradyzoites exhibit physiological plasticity of calcium and energy stores controlling motility and egress
Source: eLife. 2021 Dec 3;10:e73011. doi: 10.7554/eLife.73011 (PMC8683080; doi:10.7554/eLife.73011)
Supplement: Figure 5—source data 1. [file elife-73011-fig5-data1.xlsx]

## Sheet: Sheet1
Figure 5B	Calcium reponses of extracellular single tachyzoite and bradyzoite stimulated by calcium agonists
		GCaMP6f fluorescence intensity fold changes (F/F0)
	Time (min)	Tachyzoite treated with A23187										Tachyzoite treated with zaprinast										Bradyzoite treated with A23187										Bradyzoite treated with zaprinast
	0	1	1	1	1	1	1	1	1	1	1	1	1	1	1	1	1	1	1	1	1	1	1	1	1	1	1	1	1	1	1	1	1	1	1	1	1	1	1	1	1
	0.05	0.901517	0.972477	1.13462	0.927143	0.982792	1.0356	0.937549	0.962916	1.05755	0.979463
	0.1	1.0224	0.978826	0.998761	0.916466	1.03593	0.95543	1.01638	1.07062	0.84856	0.942913	1.10437	1.07825	1.00038	1.08159	1.04671	1.1624	0.880134	1.02156	0.705997	1.295	0.973059	0.972242	1.1124	0.866097	1.41076	0.723141	1.02381	1.00636	1.03528	0.84426	1.00105	1.09119	0.992954	0.911682	0.995781	0.931502	0.824429	1.17168	0.955716	1.1392
	0.15	1.00238	0.993299	1.00622	0.915677	1.07224	1.06596	0.930251	0.995692	0.990574	1.08989	1.01608	1.02765	1.15257	0.972087	1.03655	1.25079	0.716714	0.964998	1.27306	0.788253
	0.2	1.03453	0.992266	0.973717	1.03374	0.980653	0.983814	0.886982	1.05106	1.03657	1.05314											0.985535	1.01577	1.01821	1.20663	0.76567	0.956093	0.897959	1.08496	0.93258	0.877134	0.981636	1.04583	1.04091	1.15754	0.717516	0.863146	0.854034	1.03689	0.940425	0.935026
	0.25	0.919793	1.00684	1.06145	0.944986	1.11226	0.885889	1.00502	1.00985	0.997341	1.0785	1.02393	0.9343	1.0459	0.951436	1.07078	0.975551	1.06507	1.1308	1.35784	1.06482
	0.3	1.01472	0.943778	1.01199	0.928371	1.04238	0.910732	1.06147	0.9524	1.03299	1.04086											1.11375	0.992235	1.13978	0.712919	1.46275	0.931179	0.915489	0.765589	1.10819	0.920252	0.992869	1.12038	0.94349	0.907721	1.05799	0.780711	1.03247	0.694441	0.974306	0.995882
	0.35	1.11302	0.947475	0.915661	1.093	1.07158	0.873133	1.02398	1.04275	1.04311	1.14771	1.0931	0.980809	0.995947	1.09558	1.08211	1.08457	1.28154	0.780295	1.22691	1.12069
	0.4	0.879137	1.02219	1.0566	1.17597	1.05527	1.27755	1.02477	1.10315	1.13034	1.09645	1.31857	1.15848	1.24379	1.3891	1.21925	1.07758	0.954014	1.36028	1.17272	1.04894	1.06847	1.18913	1.09746	1.15273	0.703757	1.06576	0.890372	0.948412	0.803253	0.916562	0.934361	0.921438	0.949117	0.734201	1.00002	0.825294	0.972925	1.10338	0.946416	0.949195
	0.45	1.05066	1.00394	0.887089	1.39988	1.48959	1.36273	1.12761	1.16781	1.17863	1.15718
	0.5	0.970375	0.950347	1.01443	1.76777	1.70111	1.87629	2.4328	2.36504	2.34016	2.51885	2.04157	1.91923	1.95297	2.03724	2.05855	1.72636	2.14266	1.71167	2.06278	1.77338	1.07611	1.11695	1.12471	1.16212	0.721615	0.73868	0.989796	0.773952	1.01654	1.12174	0.914101	0.832289	1.00251	0.876922	0.529538	1.15123	1.12223	0.942234	0.673355	0.9905
	0.55	1.81984	1.67881	1.61606	2.2383	2.32169	2.19959	3.60141	3.64075	3.64669	3.68587
	0.6	3.62624	3.53304	3.58852	2.69371	2.50541	2.61573	3.98265	3.81215	3.9196	3.99544	2.09523	2.10811	2.10013	2.12931	2.12048	1.77398	1.53444	1.97946	1.79083	1.74997	1.18312	1.10106	1.03292	1.38951	1.54023	0.830469	0.940084	1.1384	0.806121	1.09175	0.932603	0.929728	0.963705	0.793792	0.904298	0.972839	1.1959	0.717397	0.763828	1.33932
	0.65	3.55498	3.71163	3.71162	2.84897	2.83925	2.78206	4.21199	4.21812	4.08641	4.09189	2.17762	2.09219	2.13855	2.10683	2.19615	1.97515	2.03742	1.82961	1.77299	2.10082
	0.7	3.74014	3.86269	3.74244	2.84143	2.87331	2.88842	3.6925	3.84091	3.78066	3.7478											1.07046	1.08239	1.00903	1.07582	1.37208	1.00497	0.911565	0.892337	0.863719	0.867701	0.947434	1.03244	0.851532	0.740415	0.743401	1.13628	0.887032	0.873059	0.636891	1.101
	0.75	3.77783	3.64299	3.75803	2.81069	2.83736	2.77134	3.53391	3.57728	3.59068	3.617	2.1884	2.02119	2.00582	2.15368	2.22258	1.35307	1.57364	1.75903	1.46538	1.77762
	0.8	3.74717	3.61292	3.60663	2.69384	2.86488	2.70146	3.0369	3.10622	3.08536	3.10108											1.09348	1.08629	1.10229	1.04589	1.57252	1.58045	0.863422	0.695871	0.707137	0.793598	1.07411	1.11348	1.0798	0.753258	0.828029	1.16605	1.09186	0.590053	0.9333	0.878629
	0.85	3.6487	3.63911	3.63662	2.65612	2.57124	2.75628	2.65378	2.66342	2.63609	2.68006	1.91563	2.08994	2.086	2.00562	1.93174	1.16971	1.23069	1.13425	1.1829	1.29767
	0.9	3.49159	3.54316	3.54995	2.58535	2.68668	2.52545	2.62207	2.59919	2.57874	2.59397	1.91117	1.88588	1.92593	1.85856	2.03679	0.935849	1.23901	0.858649	1.03087	1.02474	1.17328	1.17575	1.17833	0.985637	1.24563	1.32085	0.884354	0.758101	1.07067	1.00681	0.913273	1.03162	1.13887	0.799676	0.648929	1.00254	1.1371	0.558382	0.62769	1.21965
	0.95	3.47606	3.50294	3.50685	2.4753	2.44566	2.52278	2.47697	2.45611	2.47879	2.4492
	1	3.37295	3.51861	3.36356	2.33179	2.491	2.41743	2.36683	2.35372	2.31932	2.36821	1.75853	1.80768	1.83251	1.70723	1.82473	1.10193	0.658067	0.93359	0.934261	0.879728	1.23478	1.21625	1.27913	0.906162	1.37291	0.774074	0.926217	0.930156	1.09823	1.02369	1.04788	1.04402	0.990249	0.846899	0.771686	0.744276	0.473247	0.959968	0.816958	0.722668
	1.05	3.27037	3.29521	3.27748	2.37835	2.2742	2.35783	2.2841	2.29491	2.28218	2.27541
	1.1	3.27391	3.21257	3.15121	2.36291	2.24953	2.24171	2.20538	2.1539	2.23145	2.11701	1.61318	1.55021	1.64184	1.68636	1.61729	0.860224	0.862946	0.819643	1.06633	0.820155	1.50813	1.45995	1.40104	1.14111	1.1786	1.02152	0.925693	1.1084	0.886335	0.866006	0.988247	1.07555	1.17782	1.02915	0.457897	0.655117	0.80655	0.673096	1.14371	1.24917
	1.15	3.06912	3.21954	3.0792	2.29757	2.29123	2.1199	2.24875	2.20268	2.02261	2.2624	1.45135	1.58375	1.58239	1.4338	1.4294	0.905579	0.812661	0.724298	0.793201	0.823281
	1.2	3.02512	3.05035	3.18961	2.05008	2.20391	2.28052	2.18075	2.05573	2.03838	2.10394											1.6096	1.58959	1.52904	1.12964	1.12875	1.12255	0.953951	1.27041	1.25359	1.28876	1.29269	1.30125	1.29647	0.831852	0.478626	0.959537	0.715541	0.642249	1.01767	1.40152
	1.25	3.07059	3.10054	3.11977	2.12195	2.13743	2.12729	2.15624	1.94816	1.94246	2.00122	1.395	1.41288	1.40447	1.51398	1.27333	0.568152	0.738179	1.12018	1.05778	0.542828
	1.3	2.93204	3.15537	2.96056	2.13341	2.02899	2.10755	1.85601	1.87676	1.84982	1.96942											1.63443	1.62813	1.63383	1.61294	0.884776	1.34528	0.844322	1.69739	1.72256	1.67893	1.28482	1.29841	1.27156	0.867261	0.712402	1.00633	0.939954	0.770958	1.36928	1.08386
	1.35	3.1027	2.91879	2.87723	2.03385	2.07376	1.97978	1.69164	1.74714	1.86114	1.77531	1.27749	1.43559	1.23601	1.37883	1.28174	0.620649	1.10232	0.638231	0.634261	0.772294
	1.4	2.88886	2.77995	2.95874	2.02734	1.89998	2.01282	1.80318	1.80245	1.8139	1.81657	1.18131	1.3457	1.15928	1.16817	1.17642	1.00577	0.52332	0.849835	0.86266	0.772736	1.58093	1.59482	1.67207	1.29393	1.51507	1.51899	0.796442	2.02168	2.05725	1.82674	1.30724	1.30931	1.31001	0.86244	0.817706	0.862624	1.17546	0.901299	1.50835	1.63619
	1.45	#1	#2	#3	#4	#5	#6	#7	#8	#9	#10
	1.5											1.16541	1.12038	1.32359	1.25126	1.14572	0.814881	0.668944	0.836587	0.714144	0.969671	1.59738	1.62766	1.40232	1.25173	1.58997	1.32071	0.972789	2.0519	2.10658	2.07821	1.40509	1.33168	1.20733	1.27905	0.689127	1.21508	1.11259	1.0971	2.07504	1.66095
	1.55
	1.6											1.15911	1.14784	1.20139	1.19197	1.14097	0.891422	0.84756	0.627804	0.649106	1.08392	1.67551	1.5122	1.6504	1.2035	1.35267	1.28894	0.951073	1.93243	1.87933	1.99146	1.23398	1.26617	1.29933	1.05665	1.55636	0.862483	1.15694	1.18356	2.06147	1.32698
	1.65											1.23467	1.0299	1.19117	1.22665	1.26389	0.672094	0.775064	0.8565	0.736243	0.907905
	1.7																					1.5395	1.57015	1.6582	1.2036	1.38661	1.42557	0.987441	2.13795	2.12917	2.21257	1.24795	1.23066	1.10825	1.00901	0.94997	1.63097	1.1682	0.692804	1.27028	1.35126
	1.75											1.01364	1.09917	1.21665	0.9559	0.991512	0.701382	0.828126	0.701068	0.710961	0.643249
	1.8																					1.55554	1.5485	1.57503	1.37578	1.39042	1.24415	1.00131	2.1266	1.99832	2.08596	1.14553	1.10257	1.14439	1.05267	1.02609	1.04575	0.815191	1.14406	0.914451	1.1406
	1.85											1.12219	0.951389	1.17607	1.12308	1.09161	0.675443	0.793487	0.757762	0.77693	0.745446
	1.9											0.9513	1.13831	1.10012	0.830679	1.02602	0.66241	0.671914	0.831182	0.663926	0.71544	1.5355	1.56902	1.47036	1.32968	1.3642	1.27757	1.04003	2.08535	2.11585	1.76955	1.10729	1.08757	1.05356	0.760471	0.936398	1.06234	1.07044	0.712382	1.09334	1.06773
	1.95
	2											1.13703	0.919776	1.03095	1.17721	1.0642	0.869918	0.661425	0.504267	0.740912	0.708676	1.51406	1.43393	1.48043	1.2416	1.33008	1.38927	1.09864	1.85159	1.7127	1.96877	1.02906	1.03665	1.03756	0.511079	1.09095	1.0348	0.501943	0.903886	1.44071	0.707601
	2.05											#1	#2	#3	#4	#5	#6	#7	#8	#9	#10
	2.1																					1.45769	1.35945	1.51365	1.25132	1.03966	1.20486	1.01282	1.82113	1.82501	1.81085	1.03522	0.943499	0.988352	0.735673	1.10653	0.794635	0.715133	0.779293	0.910407	0.963634
	2.15
	2.2																					1.40652	1.31345	1.55255	1.21626	0.971925	0.8104	1.16693	1.80596	1.51205	1.66444	0.99201	0.920847	0.906556	1.08	0.745163	0.811671	0.715122	0.560675	0.939095	0.862485
																						#1	#2	#3	#4	#5	#6	#7	#8	#9	#10	#1	#2	#3	#4	#5	#6	#7	#8	#9	#10
