# Supplementary material for: Toxoplasma bradyzoites exhibit physiological plasticity of calcium and energy stores controlling motility and egress
Source: eLife. 2021 Dec 3;10:e73011. doi: 10.7554/eLife.73011 (PMC8683080; doi:10.7554/eLife.73011)
Supplement: Figure 5—source data 2. [file elife-73011-fig5-data2.xlsx]

## Sheet: Ionomycin
Calcium responses of extracellular GCaMP6f BAG1-mCherry tachyzoites and bradyzoites treated with ionomycin (Figure 5D left panel)
GCaMP6f fluorescence intensity fold changes (F/F0)
	Time (min)	Tachyzoites										Bradyzoites
	0	1	1	1	1	1	1	1	1	1	1	1	1	1	1	1	1	1	1	1	1
	0.1	0.999641	1.03866	0.911279	1.24951	1.00129	1.09428	1.02627	1.14352	1.07856	1.03363	1.11798	0.964729	0.930356	0.945765	1.02291	1.0251	0.832185	0.96367	1.04075	0.973391
	0.2	1.015	1.01945	0.926489	0.956998	1.16685	1.30583	1.09812	1.16916	1.01556	0.892137	0.964094	0.904128	0.993735	0.908755	1.1224	0.940819	0.928256	0.928349	0.945878	0.994236
	0.3	1.04717	0.993704	0.88086	1.31042	0.885126	1.19053	1.20232	1.18154	1.2418	1.08198	0.915178	1.00537	0.933741	1.01719	0.781284	1.16259	0.882308	0.796786	1.06484	0.983893
	0.4	1.00975	0.991065	0.997972	1.10168	1.08633	1.10978	1.1116	1.3615	0.973683	0.969449	0.929554	0.912189	0.925345	1.17788	1.03874	0.850126	0.979195	0.974956	0.681324	0.979155
	0.5	1.06829	1.04604	0.921271	1.06585	1.15877	1.15703	1.2485	0.937352	1.03334	1.26498	0.970884	0.859466	0.906586	0.998588	0.966541	1.08582	1.10389	1.16392	1.22051	0.965338
	0.6	1.04426	1.06567	1.0371	1.15737	1.00313	1.28839	0.911344	1.50772	1.18169	1.1534	1.02908	0.821577	0.936884	0.996513	1.02707	1.00645	0.925307	0.915299	1.21143	1.03387
	0.7	1.30517	1.28182	1.26986	0.944787	1.42064	0.940115	1.18579	1.18485	1.19795	1.21528	0.893804	0.870507	0.993121	0.965675	1.08075	0.992956	0.996136	1.22598	0.976444	1.03111
	0.8	1.71564	1.53707	1.58272	1.30373	1.27823	1.37457	1.41591	1.59306	1.65318	1.69548	1.02796	0.84138	0.9591	1.19041	0.853823	0.957101	1.1644	1.06961	1.08916	1.015
	0.9	2.63201	2.63325	2.61721	1.87232	2.04805	2.11658	2.43547	2.50021	2.53709	2.72292	1.01928	0.954843	0.995772	0.848685	1.02302	1.0996	1.18195	1.18764	1.17295	1.03987
	1	2.68031	2.705	2.6769	2.22862	1.79597	2.25434	2.21661	2.4249	2.16138	2.40724	1.13791	1.04606	1.16284	0.87861	1.1535	1.27357	1.44545	1.23376	1.15144	1.0439
	1.1	2.58684	2.71683	2.5196	2.06827	2.06135	2.05769	1.91843	1.99585	2.0009	2.11004	1.30658	1.41307	1.30232	1.01399	1.30207	1.06726	1.39669	1.35075	1.40123	1.03379
	1.2	2.47354	2.4348	2.49461	1.95667	1.97619	1.95631	1.99198	1.80296	1.64129	1.96593	1.46385	1.61873	1.42565	1.42987	1.27433	1.2374	1.40439	1.40706	1.46151	0.979234
	1.3	2.25742	2.29927	2.44513	2.03038	1.62189	1.9635	1.83253	1.81145	1.4871	1.80789	1.536	1.51308	1.5208	1.23612	1.17539	1.34221	1.44792	1.38224	1.46581	0.923569
	1.4	2.11256	2.26483	2.19602	1.60093	2.07188	1.65699	1.89671	1.76213	1.76733	1.53888	1.51046	1.59892	1.44572	1.35037	1.57679	1.18252	1.37489	1.50147	1.37249	0.908804
	1.5	2.09811	2.13785	2.05238	1.61181	1.7654	1.75235	1.70651	1.65804	1.68572	1.65098	1.51332	1.56831	1.48369	1.68119	1.40549	1.62856	1.41998	1.41816	1.34608	0.905961
	1.6	1.97982	2.02212	1.97998	1.8004	1.75119	1.37735	1.40826	1.52679	1.56473	1.87965	1.51203	1.49905	1.50142	1.59992	1.35572	1.39185	1.52136	1.47935	1.49956	0.910067
	1.7	1.80311	1.97933	1.91419	1.4435	1.63196	1.74116	1.36227	1.73355	1.59507	1.61381	1.48627	1.4908	1.3741	1.19299	1.47871	1.2431	1.68447	1.61987	1.4342	1.11852
	1.8	1.72904	1.89143	1.82482	1.36159	1.59278	1.6923	1.45072	1.49543	1.75717	1.54298	1.3921	1.39158	1.39137	1.56259	1.42035	1.24086	1.36567	1.69284	1.43046	1.76707
	1.9	1.73964	1.74548	1.71636	1.47534	1.47083	1.47218	1.48397	1.57154	1.52215	1.26799	1.43234	1.24602	1.29559	1.44876	1.32811	1.06829	1.49075	1.485	1.39112	1.96194
	2	1.64969	1.65555	1.6884	1.21696	1.2983	1.76085	1.40214	1.40409	1.71042	1.40081	1.30564	1.29622	1.29513	1.27457	1.28952	0.964501	1.51151	1.42437	1.3516	1.43972
	2.1	1.68594	1.61479	1.53101	1.56287	1.0515	1.54684	1.36618	1.3523	1.23981	1.37313	1.32402	1.2209	1.20465	1.19281	1.0239	1.23735	1.39214	1.42833	1.41032	1.57481
	2.2	1.62076	1.55319	1.52544	1.27848	1.19719	1.57027	1.51063	1.48819	1.3616	1.00636	1.22524	1.11702	1.29796	1.22959	1.02555	1.02673	1.43237	1.29933	1.21919	1.32594
	2.3	1.51996	1.49276	1.56975	1.37858	1.43125	1.13117	1.35313	1.07718	1.50005	1.50706	1.13277	1.14674	1.3218	1.05509	0.946633	1.09194	1.22285	1.24981	1.33279	1.16857
	2.4	1.46249	1.47485	1.46673	1.01659	1.60824	1.2689	1.40933	1.48152	1.133	1.0693	1.19627	1.17452	1.15894	1.03598	0.996159	1.0039	1.29861	1.22721	1.2402	1.19463
	2.5	1.39252	1.43873	1.40464	1.04743	1.52514	1.19627	1.01874	1.20947	0.97508	1.54094	1.09884	1.14673	1.12141	1.19317	1.2163	0.950038	1.26602	1.17923	1.24026	1.23845
	2.6	1.44378	1.31759	1.34752	1.51432	1.13098	1.02933	1.1939	1.48733	1.06443	1.01028	1.06607	1.12149	1.11183	1.03295	1.08863	0.989217	1.2817	1.34022	1.30459	1.04303
	2.7	1.31985	1.36978	1.29087	1.46516	0.910425	1.20705	1.10715	1.14099	1.1722	1.359	1.0327	1.15479	0.959359	1.10061	1.16241	1.10383	1.17206	1.38396	1.18262	0.949151
	2.8	1.31746	1.29492	1.2678	1.19927	1.1401	1.1557	1.02569	1.29691	1.35109	1.25608	1.14173	1.12728	1.07155	0.952034	0.988391	1.18505	1.3518	1.29393	1.0962	0.909988
	2.9	1.2228	1.24742	1.34991	1.38793	0.976789	1.08861	1.33135	0.860627	1.45606	1.3515	1.10156	1.08367	1.08204	1.16426	0.853885	1.05616	1.24458	1.09513	1.24418	0.902724
	3	1.29126	1.23259	1.25074	0.969132	1.00723	1.3942	0.971362	1.27459	1.12261	1.24214	1.08552	1.07178	1.05856	1.01487	0.874077	1.09814	1.06658	1.4062	1.0662	1.18137
		#1	#2	#3	#4	#5	#6	#7	#8	#9	#10	#1	#2	#3	#4	#5	#6	#7	#8	#9	#10

## Sheet: Thapsigargin
Calcium responses of extracellular GCaMP6f BAG1-mCherry tachyzoites and bradyzoites treated with thapsigargin (Figure 5D middle panel)
GCaMP6f fluorescence intensity fold changes (F/F0)
	Time (min)	Tachyzoites										Bradyzoites
	0	1	1	1	1	1	1	1	1	1	1	1	1	1	1	1	1	1	1	1	1
	0.1	0.992618	0.975824	0.958487	1.04502	1.04233	1.04107	1.08549	1.06525	1.13089	1.05604	0.997034	0.907166	1.04274	1.05895	0.991166	0.825398	1.14265	0.908741	1.10037	1.03857
	0.2	0.990938	0.977973	0.979414	1.05806	1.18303	1.14805	1.18114	1.1196	1.10837	1.09586	0.928395	1.06385	0.948273	0.979267	0.998287	0.96598	1.01379	1.0603	0.931484	0.833003
	0.3	0.939466	1.07353	0.96238	1.08143	1.13839	1.18781	1.21107	1.14625	1.06284	0.981671	1.0277	0.89853	1.04353	1.0267	0.997335	0.941299	0.934085	0.948878	1.00331	1.08708
	0.4	0.854445	0.997468	1.09803	1.12472	1.11346	1.21999	1.17449	1.14961	0.755243	1.24223	0.918141	1.07307	0.928682	1.09852	1.03514	0.838613	0.825075	0.920863	1.00599	1.18743
	0.5	0.943683	0.951437	0.962773	1.12546	1.13795	1.18092	1.23807	1.18176	1.03783	0.772127	0.960142	1.00737	0.931467	1.07778	1.11015	0.851714	0.944511	0.634991	1.14857	0.920059
	0.6	1.20478	1.20321	1.1988	1.38032	1.18289	1.25448	1.23728	1.3088	0.911888	1.28103	0.9003	1.03152	0.978558	1.24751	1.08719	0.879234	0.781882	0.838552	1.25115	1.22438
	0.7	1.12522	1.28116	1.2755	1.75105	1.57175	1.43036	1.21146	1.48125	1.12236	1.12208	1.05867	0.947526	1.03088	1.23708	1.05689	0.776254	0.863491	0.792963	1.19979	1.3558
	0.8	1.48177	1.55551	1.32243	2.18057	1.91851	1.45666	1.24433	1.71245	1.59235	1.75717	1.01766	1.01105	1.04496	1.09804	1.05182	1.2293	1.25912	1.13264	1.04785	1.18674
	0.9	1.49996	1.31078	1.44763	2.88192	2.52313	1.84834	1.27445	2.07819	2.22765	1.99952	0.940866	1.12057	0.920554	1.13314	1.02643	1.28559	1.13924	1.22585	1.4739	0.883135
	1	1.36948	1.41583	1.41775	3.14613	2.27487	2.45199	1.4734	2.30976	2.66557	2.88474	1.40604	1.42386	1.38393	1.20862	0.977002	1.17553	1.22251	1.24468	1.2316	1.18476
	1.1	1.57316	1.62034	1.4589	2.94022	2.37225	2.15969	1.55888	2.24955	2.89452	2.23766	1.33337	1.54824	1.3779	1.20869	0.967635	1.19016	1.11138	1.29462	1.41151	1.33798
	1.2	1.88135	1.86508	2.02224	2.79951	2.57419	1.89368	1.53071	2.16511	2.21622	2.25149	1.3896	1.45601	1.39878	1.16451	0.949663	1.36501	1.10744	1.18918	1.05302	1.3385
	1.3	2.61099	2.47766	2.56639	3.00025	2.14841	1.97541	1.57766	2.28895	2.00836	2.04522	1.36255	1.47251	1.41545	1.06728	0.939801	1.13612	1.47627	1.31659	1.05711	1.27851
	1.4	2.52402	2.61315	2.49505	2.8674	2.18665	2.20769	1.52015	2.19378	1.80443	2.14111	1.37788	1.529	1.49615	1.21919	0.952595	1.38576	1.41649	1.38312	1.2102	1.28303
	1.5	2.4606	2.45701	2.46672	2.81476	2.27386	2.25136	1.55301	2.18389	1.74452	1.76124	1.47285	1.64365	1.61625	1.216	0.935651	1.49605	1.37772	1.28571	1.21606	1.43059
	1.6	2.47168	2.35594	2.30157	2.67651	2.22982	2.12903	1.51878	2.09764	1.63927	1.40786	1.64415	1.66874	1.72036	1.21973	0.94616	1.34447	1.49832	1.33037	1.01408	1.38805
	1.7	2.2186	2.29716	2.23798	2.52349	1.78092	2.40206	1.49746	2.01048	1.30885	1.5151	1.71886	1.62559	1.65213	1.21736	0.939535	1.33193	1.49135	1.23066	1.11097	1.10672
	1.8	2.1895	2.08646	2.27714	2.3198	1.6	2.26251	1.49707	1.90843	0.859866	1.12458	1.55629	1.71378	1.78086	1.13097	0.936298	1.32615	1.15532	1.4475	1.38898	0.929223
	1.9	2.22597	2.08366	2.03595	2.11119	1.82543	2.12889	1.4687	1.78995	1.03546	1.0891	1.57901	1.64749	1.68707	1.20144	0.9331	1.24386	1.1415	1.41716	1.23815	1.18846
	2	1.92731	2.03531	1.97762	1.98696	1.77475	2.12854	1.49335	1.74016	0.91694	1.06611	1.61985	1.59645	1.55989	1.17332	0.906675	1.17603	1.29269	1.1618	0.983494	1.30268
	2.1	1.92217	1.90714	1.96561	1.79041	2.01703	1.45934	1.50646	1.64843	0.987377	0.987149	1.45303	1.53019	1.64627	1.15299	0.893881	1.08019	1.08503	1.26965	1.3544	1.22393
	2.2	1.86529	1.83263	1.90967	1.66396	1.2934	1.47389	1.45051	1.55723	0.957242	0.645887	1.47436	1.52282	1.4573	1.11627	0.89232	1.23893	1.11155	0.895458	1.1369	0.842229
	2.3	1.87007	1.88893	1.67621	1.56581	1.40267	1.47711	1.41334	1.48957	0.737785	1.00307	1.41106	1.30437	1.52606	1.07914	0.905304	0.926334	1.09359	1.08587	0.850429	1.28913
	2.4	1.66283	1.78759	1.73852	1.49988	1.41395	1.47399	1.38282	1.44135	0.977221	0.796843	1.34006	1.44037	1.22557	1.06206	0.915547	1.09158	0.912755	0.913267	1.06005	0.865783
	2.5	1.62559	1.74105	1.69432	1.34317	1.62377	1.09232	1.35035	1.34676	0.963266	0.739219	1.28767	1.24888	1.30763	1.00603	0.93706	1.03226	0.878333	0.906203	1.07105	1.14358
	2.6	1.69454	1.53735	1.67323	1.22337	0.943293	1.38643	1.36991	1.29664	0.614247	0.934298	1.26213	1.20986	1.17015	1.04648	0.907512	0.99005	0.836719	0.968618	0.846008	1.14462
	2.7	1.5714	1.61062	1.64237	1.17663	1.27083	1.4012	1.32394	1.25029	0.73251	0.916839	1.1595	1.12582	1.24229	1.03909	0.896775	0.937785	0.749954	1.02376	1.0076	0.905873
	2.8	1.5515	1.55456	1.5641	1.10086	1.17636	1.20219	1.28443	1.19264	0.937767	0.680914	1.22015	1.1762	1.12257	0.98794	0.896737	0.941375	0.798415	0.881351	1.25203	0.832158
	2.9	1.49022	1.6002	1.49739	1.10923	1.17054	1.39618	1.24687	1.17805	0.918026	0.671281	1.22813	1.15092	1.0292	1.02798	0.889921	0.949692	0.910907	0.837708	0.950125	0.789411
	3	1.44955	1.44191	1.55989	1.13014	1.18037	1.17877	1.22242	1.17628	0.866535	0.720504	1.09122	1.21085	0.992941	1.01179	0.898488	0.984122	0.919241	0.855682	0.920658	1.09216
		#1	#2	#3	#4	#5	#6	#7	#8	#9	#10	#1	#2	#3	#4	#5	#6	#7	#8	#9	#10

## Sheet: NH4Cl
Calcium responses of extracellular GCaMP6f BAG1-mCherry tachyzoites and bradyzoites treated with NH4Cl (Figure 5D right panel)
GCaMP6f fluorescence intensity fold changes (F/F0)
	Time (min)	Tachyzoites										Bradyzoites
	0	1	1	1	1	1	1	1	1	1	1	1	1	1	1	1	1	1	1	1	1
	0.1	1.08072	1.09383	1.08491	0.993048	0.974691	1.11283	1.049	1.05504	1.02078	0.971929	1.07239	0.966676	1.03962	0.99148	0.910876	1.08535	1.12558	1.07078	0.962418	0.970091
	0.2	1.09899	1.08717	1.23711	1.19687	0.898476	1.01441	1.19901	1.28936	1.18313	0.912451	0.974794	1.01635	1.14105	0.959075	0.970443	1.00081	1.15055	1.02476	1.03668	1.04457
	0.3	1.14044	1.24097	1.0197	0.903467	1.20497	0.958112	1.33606	1.18568	1.56031	0.910043	1.19713	1.08943	1.03092	0.98722	1.27317	1.15766	1.09061	1.32822	1.00238	1.03128
	0.4	1.14858	1.06263	0.968833	0.81232	0.967634	0.958499	1.34213	1.36352	1.40859	0.902168	1.14211	1.03448	1.14903	0.983265	1.24349	0.965625	1.09791	1.02579	1.06861	1.09239
	0.5	1.05139	1.07818	1.06324	0.967339	0.829402	0.842854	1.28143	1.2782	1.27974	0.881508	1.01507	1.18024	1.19273	0.998783	1.01817	1.1589	0.95523	0.989659	0.9262	0.979231
	0.6	1.02648	1.0201	1.00272	0.830497	0.668459	1.0231	1.35125	1.28093	1.3855	0.871503	1.09284	1.09782	1.22955	0.996501	1.20502	0.941963	1.12127	0.912814	0.815502	1.105
	0.7	1.02347	1.00393	0.991849	0.841564	0.86115	0.792486	1.18225	1.22677	1.30815	0.90856	1.13253	1.12051	1.11871	1.00563	1.25159	1.02217	1.11584	0.919698	0.978905	0.881341
	0.8	1.98665	2.09561	2.03975	2.02876	1.88971	1.75927	1.29065	1.28508	1.05358	1.57504	1.10393	1.17182	1.12585	1.02282	1.10575	1.1163	1.14701	0.98284	0.987159	0.854176
	0.9	2.48414	2.38975	2.44148	2.3076	2.22058	2.25257	2.37246	2.36787	2.3974	1.81156	1.10886	1.07624	1.18781	1.08033	1.04233	1.03286	1.25146	1.12902	0.955394	1.10603
	1	2.39617	2.49162	2.57331	2.30004	2.32521	2.22516	2.34174	2.5268	2.40139	1.82916	1.11396	1.03831	1.23072	1.05857	1.10307	1.12185	1.11495	0.890986	1.07297	1.04226
	1.1	2.49115	2.45333	2.55809	2.35025	2.20035	2.19979	2.30008	2.39433	2.48985	1.84056	1.12212	1.19113	1.06122	1.11152	1.11093	1.10691	1.16719	0.9802	1.07024	1.05448
	1.2	2.41492	2.42177	2.47394	2.30348	2.07093	2.27868	2.25263	2.25193	2.38918	1.83537	1.14371	1.11233	1.11145	1.14757	1.04974	1.2726	1.26023	1.03353	1.15139	1.03258
	1.3	2.32007	2.31362	2.47884	1.96789	2.24302	2.28299	2.38187	2.00544	2.32116	1.80869	1.04913	1.11652	1.18439	1.17374	1.0525	1.42536	1.23154	1.03817	1.07877	1.0863
	1.4	2.24356	2.31363	2.35634	2.11396	2.0725	2.11829	2.26724	2.20113	1.98089	1.6813	1.11987	1.11586	1.12168	1.27004	1.31449	1.32014	1.02048	1.10118	1.13265	0.989149
	1.5	2.25348	2.24602	2.24947	1.97015	2.0353	2.11676	2.12297	2.03255	2.145	1.57402	1.14802	1.10117	1.10744	1.16172	1.20937	1.20204	1.21268	0.953597	0.92657	1.25362
	1.6	2.18398	2.19068	2.18572	1.93713	2.12817	1.9199	1.86407	1.90204	1.99295	1.5201	1.08121	1.09591	1.16904	1.25027	1.30542	1.11905	1.154	1.13148	0.963749	1.06927
	1.7	2.05597	2.06311	2.17644	1.90847	1.92899	1.90839	1.72533	1.95377	2.07996	1.47017	1.15373	1.08626	1.04997	1.21862	1.13519	1.08722	1.26893	0.994943	1.01018	1.16266
	1.8	2.03921	2.09697	1.94266	1.76345	1.93152	1.83837	1.85796	1.86757	1.84304	1.42727	1.1071	1.0752	1.12433	1.24083	1.15703	1.03687	1.23903	0.998534	1.10654	1.12046
	1.9	1.90071	2.00756	1.98164	1.79902	1.87698	1.70283	1.85335	1.62148	1.91804	1.39754	1.00342	1.0895	1.21061	1.30686	0.99869	1.27587	1.12964	1.0195	1.17798	0.928265
	2	1.84077	1.98092	1.87385	1.73776	1.68931	1.74937	1.69436	1.60369	1.91955	1.36854	1.1768	1.05189	1.05235	1.26076	1.28747	1.11302	1.08583	1.05833	0.868095	1.17776
	2.1	1.93515	1.87782	1.77366	1.61317	1.75304	1.68802	1.7165	1.73952	1.60067	1.34547	1.14247	1.13887	1.01521	1.29576	1.15432	1.13152	1.28897	0.863521	1.24837	1.0559
	2.2	1.81577	1.83426	1.82191	1.51059	1.66352	1.81045	1.75642	1.60395	1.66891	1.31267	1.10406	1.13267	1.06564	1.29073	1.38768	1.0119	1.18846	1.03579	0.944927	1.08544
	2.3	1.79526	1.84197	1.78494	1.64619	1.70685	1.70742	1.93724	1.63962	1.74294	1.28655	1.11287	1.16821	0.980965	1.28556	1.42134	1.05083	1.15056	1.02644	0.979078	1.05004
	2.4	1.72586	1.7692	1.67139	1.704	1.79755	1.79088	1.48553	1.66088	1.66585	1.22874	1.07769	1.01476	1.15409	1.22501	1.25397	1.18285	1.1266	0.986129	0.98816	0.961377
	2.5	1.61843	1.78854	1.58037	1.54092	1.69652	1.73078	1.42518	1.35795	1.73035	1.17788	1.0806	0.982921	1.15821	1.15701	1.04643	1.22696	1.15133	1.02927	0.748307	1.12628
	2.6	1.49086	1.65	1.60422	1.39059	1.6069	1.564	1.6437	1.33814	1.39508	1.13433	1.09766	1.02669	1.08459	1.1138	1.14011	1.14111	1.08557	0.922746	0.841482	1.14548
	2.7	1.55051	1.55323	1.49793	1.45762	1.4349	1.49267	1.37932	1.3724	1.51821	1.09227	0.995601	1.06544	1.1417	1.11091	1.02989	1.12644	1.05945	0.958994	1.06559	0.938859
	2.8	1.51586	1.4662	1.51276	1.49572	1.42872	1.3759	1.38481	1.2455	1.52437	1.06606	1.07143	1.06522	1.075	1.11395	1.05868	0.850342	1.18952	1.04754	1.05642	0.722409
	2.9	1.49665	1.42182	1.47616	1.36152	1.39098	1.43341	1.26042	1.40032	1.40696	0.981286	1.19191	0.9662	1.02331	1.10239	1.17444	0.964913	0.935467	0.908815	1.14215	0.764071
	3	1.45146	1.3343	1.54121	1.3802	1.32307	1.41648	1.3474	1.31972	1.30447	0.91347	1.04729	1.04877	1.05164	1.10072	0.976642	0.934009	1.01499	0.994923	0.79182	0.997953
		#1	#2	#3	#4	#5	#6	#7	#8	#9	#10	#1	#2	#3	#4	#5	#6	#7	#8	#9	#10
