# Supplementary material for: Toxoplasma bradyzoites exhibit physiological plasticity of calcium and energy stores controlling motility and egress
Source: eLife. 2021 Dec 3;10:e73011. doi: 10.7554/eLife.73011 (PMC8683080; doi:10.7554/eLife.73011)
Supplement: Figure 5—source data 3. [file elife-73011-fig5-data3.xlsx]

## Sheet: Ionomycin
Calcium responses of extracellular Fluo-8 loaded BAG1-mCherry tachyzoites and bradyzoites treated with ionomycin (Figure 5E left panel)
Fluo-8 fluorescence intensity fold changes (F/F0)
Time (min)	Tachyzoites										Bradyzoites
0	1	1	1	1	1	1	1	1	1	1	1	1	1	1	1	1	1	1	1	1
0.166667	0.966124	1.11942	0.936167	1.00678	1.14397	1.03739	1.15349	0.832485	1.01938	1.104	0.970156	0.973676	0.971856	1.14787	0.831855	0.931963	0.98279	0.984043	0.935111	0.979338
0.333333	0.907298	1.04063	0.966815	1.27015	1.256	0.973876	1.01979	1.1298	0.882199	0.861829	0.942875	0.958103	0.966687	1.00195	0.911725	0.938548	0.946049	0.810955	1.09	0.956255
0.5	0.996583	0.817277	0.993651	1.86504	1.96911	1.28407	1.53832	0.946491	1.04901	0.864366	1.05031	0.859792	0.900796	0.913154	0.936434	0.941832	1.11652	0.89899	0.800633	0.945601
0.666667	1.95812	1.88508	1.88487	1.94185	1.95793	1.35039	1.34999	1.39298	1.60166	1.78276	1.19677	1.17361	1.36291	1.21003	1.10423	1.28929	1.02161	1.27073	1.35474	1.21291
0.833333	2.11361	1.96272	1.94849	1.78309	1.89939	1.31592	1.32182	2.28078	2.25616	2.26723	1.1509	1.33526	1.38184	1.03421	1.35534	1.21755	1.21545	1.32507	1.3982	1.20969
1	1.8939	2.03367	2.00282	1.70401	1.69158	1.2622	1.30791	2.35555	2.11945	2.23042	1.34169	1.34928	1.35659	1.19122	1.17165	1.26643	1.33962	1.12178	1.30487	1.22228
1.16667	1.90158	1.89879	1.90499	1.41369	1.67224	1.32331	1.68702	2.11934	2.06398	2.02165	1.38096	1.51436	1.46986	1.27632	1.24828	1.25247	1.21312	1.22131	1.22492	1.23761
1.33333	1.87534	1.76529	1.69739	1.37952	1.54581	1.59782	1.50119	1.93863	1.93797	1.93912	1.37932	1.38663	1.41898	1.33043	1.33611	1.32577	1.27423	1.26271	1.52223	1.282
1.5	1.73256	1.70937	1.77042	1.50154	1.28291	1.52105	1.64129	1.7471	1.8691	1.82599	1.38368	1.26925	1.42518	1.21849	1.08158	1.20585	1.65804	1.75299	1.67266	1.22922
1.66667	1.51732	1.64389	1.69671	1.24993	1.21598	1.24122	1.63681	1.57453	1.76929	1.89066	1.28656	1.44319	1.30324	1.31125	1.06999	1.18149	1.36403	1.32789	1.22694	1.25795
1.83333	1.59537	1.55697	1.43078	1.3109	1.18845	1.37183	1.33928	1.77949	1.51851	1.8355	1.3199	1.31013	1.34487	1.36104	1.29351	1.25166	1.41597	1.51965	1.50014	1.22518
2	1.40334	1.44004	1.44339	1.21545	1.39657	1.37682	1.21469	1.6659	1.65734	1.66238	1.2336	1.44761	1.24775	1.33371	1.16869	1.41047	1.40813	1.55935	1.23497	1.19144
2.16667	1.36686	1.35346	1.36022	1.16099	1.16491	1.24905	1.35988	1.54566	1.6944	1.66078	1.28829	1.22495	1.25552	1.31038	1.29978	1.31869	1.47557	1.49653	1.32587	1.20823
2.33333	1.31011	1.35647	1.28032	1.16168	1.18123	1.38064	1.12684	1.82341	1.48395	1.67626	1.25512	1.12274	1.24426	1.51549	1.2509	1.25476	1.76628	1.37963	1.52357	1.22809
2.5	1.26631	1.26337	1.38617	1.07919	1.04725	1.14117	1.153	1.60195	1.73531	1.57181	1.15744	1.14034	1.14466	1.2544	1.31708	1.24642	1.58249	1.72066	1.40902	1.23471
2.66667	1.28658	1.15802	1.33263	1.04014	1.04006	1.1816	1.21746	1.4209	1.77684	1.67193	0.96969	1.10763	1.08963	1.38165	1.11653	1.08541	1.18315	1.28577	1.10969	1.20969
2.83333	1.36284	1.27274	1.14109	0.927807	1.03545	1.18142	1.20331	1.44545	1.47022	1.8009	1.0221	0.961352	0.963148	1.20951	1.20926	1.20918	1.10264	1.17567	1.27579	1.21001
3	1.15582	1.21239	1.21866	1.08681	0.999934	0.95339	1.17428	1.54844	1.57293	1.58672	1.02943	0.889303	0.850629	1.20552	1.17403	1.21735	1.07269	1.19775	1.21097	1.19855
	#1	#2	#3	#4	#5	#6	#7	#8	#9	#10	#1	#2	#3	#4	#5	#6	#7	#8	#9	#10

## Sheet: Thapsigargin
Calcium responses of extracellular Fluo-8 loaded BAG1-mCherry tachyzoites and bradyzoites treated with thapsigargin (Figure 5E middle panel)
Fluo-8 fluorescence intensity fold changes (F/F0)
Time (min)	Tachyzoites										Bradyzoites
0	1	1	1	1	1	1	1	1	1	1	1	1	1	1	1	1	1	1	1	1
0.166667	1.11088	0.937337	1.05316	1.17685	0.950964	0.95521	0.95874	1.00702	0.754789	1.00336	1.04683	1.03214	1.03918	0.892855	0.933811	1.06392	0.999075	0.921174	0.891134	1.09805
0.333333	1.01173	1.12672	0.996515	0.916105	1.05484	0.993082	0.707607	0.833092	0.821349	0.913544	1.05222	1.04034	0.953284	0.880995	0.980305	1.15261	0.894977	0.949021	0.964216	0.969837
0.5	1.21396	1.20867	1.19089	1.01178	1.20402	1.02593	0.854318	0.868159	0.58127	2.03037	0.982993	0.921258	1.05888	0.832919	0.983509	0.984839	0.978486	0.755079	0.946705	1.13526
0.666667	1.44554	1.42192	1.54089	1.6462	1.33841	1.7084	0.69283	0.885827	1.05752	2.07432	0.965916	1.09891	0.865141	0.788429	0.959805	1.10348	0.881511	0.776213	0.84799	1.15883
0.833333	1.77904	1.75238	1.73001	2.32506	2.66209	2.45534	1.37886	1.38983	1.47105	2.09584	1.04178	0.949012	0.887368	0.722881	0.899031	0.789608	1.12978	0.932349	0.893941	0.840191
1	1.95783	1.91622	1.92455	2.46642	2.601	2.43171	1.91117	1.91413	1.80723	2.06623	1.11811	1.101	1.1076	0.895458	1.10972	0.874342	0.986009	0.98984	0.868852	0.630358
1.16667	2.16859	2.11092	2.11597	2.32374	2.55028	2.353	2.30811	2.34166	2.11993	2.01503	1.27298	1.31836	1.24813	0.987706	0.801317	1.17996	1.22082	1.1918	0.952685	0.883283
1.33333	2.20304	1.96573	2.12354	2.83639	2.57289	2.40239	2.32605	2.23994	2.16782	1.8818	1.41254	1.19695	1.44908	1.08209	1.13322	0.956392	1.16948	1.18809	0.900861	0.992414
1.5	2.07576	2.00375	2.08885	2.6049	2.58549	2.62558	2.34795	2.25631	2.28988	1.77917	1.17766	1.26639	1.11512	0.63934	0.752256	1.11718	1.05618	0.691482	0.797784	0.685753
1.66667	1.98963	1.97095	1.97309	2.46925	2.52372	2.47902	2.20109	2.20125	2.20169	1.64105	1.1074	1.13691	1.09821	0.655597	0.946776	0.863482	0.944536	0.698364	0.722829	0.725243
1.83333	1.86965	1.99602	1.83837	2.33258	2.55253	2.21275	2.461	2.14532	2.1387	1.49828	1.17935	0.96211	1.08631	0.685392	0.732017	1.0388	0.941271	0.636027	0.692707	0.744391
2	1.9051	1.7748	1.97652	2.18766	2.13972	2.27718	2.24642	2.08385	2.15267	1.43213	1.13466	0.935552	0.885311	0.683483	0.787014	0.995981	0.878829	0.752512	0.563212	0.709703
2.16667	1.8109	1.86715	1.80953	2.21603	2.14049	1.91304	2.02063	2.12494	1.91806	1.29378	1.05443	1.04365	0.708996	0.660573	0.967962	0.785534	0.872593	0.54089	0.600909	0.878988
2.33333	1.74342	1.92595	1.71901	2.01579	2.01937	1.85003	1.96139	1.96176	1.91231	1.20313	0.928367	0.887806	0.91182	0.638646	0.92154	0.882948	0.833804	0.444578	0.792195	0.753205
2.5	1.7062	1.68565	1.7173	1.78961	1.81518	1.90358	1.87017	1.86239	1.8086	1.11454	0.857404	0.919406	0.798012	0.613885	1.01042	0.686364	0.883406	0.624028	0.688679	0.637553
2.66667	1.66569	1.71175	1.68107	1.7662	1.75377	1.73703	1.94338	1.67199	1.72733	1.03976	0.9122	0.888189	0.672964	0.595835	0.970997	0.638993	0.903955	0.625243	0.850886	0.458541
2.83333	1.67354	1.61566	1.50763	1.53041	1.55066	1.84344	1.7703	1.81649	1.80889	0.953605	0.749754	0.904385	0.744313	0.573561	0.921929	0.754095	0.773424	0.611214	0.596135	0.68519
3	1.68494	1.53171	1.44695	1.68912	1.54897	1.29474	1.71355	1.71362	1.71484	0.893705	0.813956	0.675601	0.823329	0.554701	0.83193	0.80528	0.79684	0.598211	0.649561	0.604492
	#1	#2	#3	#4	#5	#6	#7	#8	#9	#10	#1	#2	#3	#4	#5	#6	#7	#8	#9	#10

## Sheet: NH4Cl
Calcium responses of extracellular Fluo-8 loaded BAG1-mCherry tachyozites and bradyzoites treated with NH4Cl (Figure 5E right panel)
Fluo-8 fluorescence intensity fold changes (F/F0)
Time (min)	Tachyzoites										Bradyzoites
0	1	1	1	1	1	1	1	1	1	1	1	1	1	1	1	1	1	1	1	1
0.166667	0.894531	1.01683	0.992605	0.763064	1.02601	0.968582	1.09472	0.877145	1.17499	1.2616	0.905086	1.09649	0.918426	1.02543	1.01646	0.979794	0.872258	0.890452	1.07163	0.898277
0.333333	1.20931	0.826439	0.951833	0.908151	0.936485	1.05288	1.109	1.17102	1.03614	1.15797	0.946081	1.04392	0.955291	1.12037	0.860452	0.925733	0.865898	0.876378	0.906568	1.06262
0.5	1.10536	0.886982	1.14703	1.00917	0.988535	0.985956	1.2167	1.15579	1.09282	1.20626	0.887251	1.02163	1.07022	0.884433	0.967197	0.900958	0.880613	0.868236	0.949257	0.91934
0.666667	0.961825	1.06241	1.2299	1.19089	0.952316	0.957628	1.07061	0.713961	0.915228	1.22591	0.976969	0.99149	0.968046	0.929034	0.825868	1.01936	0.809121	0.839551	0.897121	0.864469
0.833333	1.22535	1.27766	1.38723	1.41125	1.16588	1.51264	1.50017	1.42752	1.69818	1.37039	1.076	1.03129	1.07456	1.00744	1.12107	1.1652	0.762621	0.684455	0.874934	0.878554
1	1.61187	1.75779	1.42999	1.72818	1.72784	1.72841	1.76013	1.79614	1.94115	1.65597	1.04793	1.0354	1.01452	1.16966	1.04465	1.14855	0.800725	0.624873	0.764376	0.810727
1.16667	1.59194	1.6337	1.72732	1.74393	1.78179	1.65871	1.90817	1.86484	1.88825	1.70049	1.04668	1.05517	1.05841	1.18651	1.07607	0.986535	0.76015	0.54193	0.80525	0.859334
1.33333	1.5621	1.68895	1.61458	1.86166	1.59693	1.60767	1.78649	1.90366	1.93212	1.68128	0.947269	0.999246	0.991178	1.03887	1.16276	1.07911	0.727968	0.576431	0.821543	0.82778
1.5	1.77292	1.54274	1.38621	1.52854	1.72294	1.62327	1.8742	1.89878	1.61282	1.66929	0.967849	0.827504	0.943173	0.78628	0.98087	1.16055	0.700383	0.516479	0.729654	0.810124
1.66667	1.4756	1.46793	1.67451	1.69016	1.40613	1.5724	1.64667	1.87845	1.62957	1.62961	0.939909	0.74588	0.895066	0.895723	0.987798	0.880045	0.707078	0.704414	0.772924	0.770926
1.83333	1.42197	1.32453	1.58886	1.53472	1.36863	1.52985	1.68347	1.67742	1.53509	1.56755	0.877954	0.744708	0.899547	0.928176	0.834812	0.812074	0.683937	0.682883	0.735407	0.74639
2	1.43213	1.31742	1.4741	1.46857	1.39558	1.38356	1.3549	1.68518	1.69651	1.5287	0.876876	0.73244	0.785927	0.673247	0.915135	0.838608	0.656382	0.671677	0.749156	0.766921
2.16667	1.54041	1.38126	1.15868	1.27455	1.37462	1.38524	1.40607	1.66588	1.44755	1.47635	0.86577	0.693594	0.723871	0.731087	0.825277	0.774768	0.635185	0.652433	0.723481	0.745218
2.33333	1.45726	1.30729	1.0952	1.34767	1.20373	1.33457	1.3581	1.54729	1.379	1.42862	0.826345	0.61733	0.740986	0.753702	0.773001	0.699466	0.615283	0.659338	0.677513	0.699088
2.5	1.07624	1.19553	1.4288	1.27849	1.29104	1.12904	1.3977	1.30862	1.41161	1.38927	0.80262	0.64928	0.641825	0.693427	0.753726	0.696011	0.60004	0.674879	0.694161	0.667925
2.66667	1.12736	1.28121	1.1903	1.19783	1.31926	1.03659	1.3806	1.14146	1.42484	1.34064	0.830956	0.678609	0.610038	0.917714	0.593217	0.566095	0.592727	0.674021	0.661812	0.665709
2.83333	1.06727	1.10445	1.32893	1.30184	1.01066	1.09752	1.14418	1.36592	1.27149	1.30645	0.835441	0.685538	0.631344	0.64058	0.676933	0.706764	0.576405	0.684831	0.705582	0.703724
3	1.35066	1.02161	1.01296	1.12765	1.11375	1.01943	1.18836	1.20618	1.20189	1.27897	0.795306	0.610952	0.590535	0.634378	0.631375	0.71354	0.567919	0.66036	0.671644	0.702581
	#1	#2	#3	#4	#5	#6	#7	#8	#9	#10	#1	#2	#3	#4	#5	#6	#7	#8	#9	#10
