# Supplementary material for: Toxoplasma bradyzoites exhibit physiological plasticity of calcium and energy stores controlling motility and egress
Source: eLife. 2021 Dec 3;10:e73011. doi: 10.7554/eLife.73011 (PMC8683080; doi:10.7554/eLife.73011)
Supplement: Figure 6—figure supplement 1—source data 1. [file elife-73011-fig6-figsupp1-data1.xlsx]

## Sheet: Figure 6—figure supplement 1
	Uncropped DNA gel for PCR identification of ratiometric reporter clones
