# Supplementary material for: Toxoplasma bradyzoites exhibit physiological plasticity of calcium and energy stores controlling motility and egress
Source: eLife. 2021 Dec 3;10:e73011. doi: 10.7554/eLife.73011 (PMC8683080; doi:10.7554/eLife.73011)
Supplement: Figure 6—source data 1. [file elife-73011-fig6-data1.xlsx]

## Sheet: Sheet1
Figure 6C	Western blotting analysis of ME49 GCaMP6f-P2A-mTagBFP2 BAG1-mCherry ratiometric reporter parasites
											Type	Antibody	Dilution	Source	Llink
											Primary	Mouse anti-6XHis, mAbHIS.H8	1:1000	Thermal Fisher, Cat# MA1-21315	https://www.thermofisher.com/antibody/product/6x-His-Tag-Antibody-clone-HIS-H8-Monoclonal/MA1-21315
											Primary	Rabbit anti-tRFP polyclonal antibody	1:1000	Axxora, Cat# EVN-AB233-C100	http://evrogen.com/products/antibodies/AB-tRFP.shtml
											Primary	Mouse mAb DG52 anti-SAG1	1:1000	Long, Shaojun et al. “Calmodulin-like proteins localized to the conoid regulate motility and cell invasion by Toxoplasma gondii.” PLoS pathogens vol. 13,5 e1006379. 5 May. 2017, doi:10.1371/journal.ppat.1006379
											Primary	Mouse mAb 8.25.8 anti-BAG1	1:1000	Weiss, L M et al. “Identification of Toxoplasma gondii bradyzoite-specific monoclonal antibodies.” The Journal of infectious diseases vol. 166,1 (1992): 213-5. doi:10.1093/infdis/166.1.213
											Primary	Rabbit polyclonal antibody to recombinant TgActin1	1:1000	Sahoo, Nivedita et al. “Unusual kinetic and structural properties control rapid assembly and turnover of actin in the parasite Toxoplasma gondii.” Molecular biology of the cell vol. 17,2 (2006): 895-906. doi:10.1091/mbc.e05-06-0512
											Secondary	IRDye 800CW Goat anti-rabbit IgG	1:10000	LI-COR Biotechnology, Cat# Cat# 926-32211	https://www.licor.com/bio/reagents/irdye-800cw-goat-anti-rabbit-igg-secondary-antibody
											Secondary	IRDye 680RD Goat anti-rabbit IgG	1:10000	LI-COR Biotechnology,Cat# 926-68071	https://www.licor.com/bio/reagents/irdye-680rd-goat-anti-rabbit-igg-secondary-antibody
											Secondary	IRDye 800CW Goat anti-mouse IgG	1:5000	LI-COR Biotechnology, Cat# Cat# 926-32210	https://www.licor.com/bio/reagents/irdye-800cw-goat-anti-mouse-igg-secondary-antibody
			Black boxes indicate the cropped protein band in Figure 6C
