# Supplementary material for: Toxoplasma bradyzoites exhibit physiological plasticity of calcium and energy stores controlling motility and egress
Source: eLife. 2021 Dec 3;10:e73011. doi: 10.7554/eLife.73011 (PMC8683080; doi:10.7554/eLife.73011)
Supplement: Figure 6—source data 2. [file elife-73011-fig6-data2.xlsx]

## Sheet: Sheet1
Figure 6D	Comparision of calcium basal levels berween tachyzoites and bradyzoites using ratiometric reporter
	FGCaMP6f/FmTagBFP2 ratios
	Intracellular tachyzoites without Ca2+	Intracellular bradyzoites without Ca2+	Intracellular tachyzoites added with Ca2+	Intracellular bradyzoites added with Ca2+	Extracellular tachyzoites without Ca2+	Extracellular bradyzoites without Ca2+	Extracellular tachyzoites added with Ca2+	Extracellular bradyzoites added with Ca2+
Independent Experiment #1	1.19392	0.51827	1.59596	0.968586	1.24146	0.8415	1.80304	1.11882
	1.13291	0.736378	1.26349	0.640687	1.30913	0.948109	1.7055	1.14843
	1.03172	0.751139	1.37737	0.716514	1.28995	0.898826	2.11866	1.25178
	1.17729	0.67606	1.39087	0.822186	1.25197	0.829867	2.23187	1.48472
	1.06811	0.784742	0.930935	0.85597	1.10191	0.855995	2.38931	1.1744
Independent Experiment #2	1.13915	0.700024	1.40153	0.978951	0.994124	0.887147	1.74566	1.05271
	0.940942	0.681691	0.983446	0.500714	1.18552	1.0794	1.8419	1.12079
	1.09148	0.718763	1.1076	0.840627	1.23859	0.990323	2.20758	1.7442
	1.03313	0.606664	1.37135	0.772133	1.42865	0.838102	2.54653	1.92501
	0.966598	0.56548	1.29855	0.513649	1.19837	0.901284	2.31578	1.70436
Test for normal distribution
Anderson-Darling test
A2*	0.1963	0.3183	0.4216	0.2791	0.2867	0.5059	0.3659	0.6853
P value	0.8474	0.4745	0.2572	0.5653	0.5444	0.1521	0.3594	0.0503
Passed normality test (alpha=0.05)?	Yes	Yes	Yes	Yes	Yes	Yes	Yes	Yes
P value summary	ns	ns	ns	ns	ns	ns	ns	ns
D'Agostino & Pearson test
K2	0.7101	1.146	0.4647	0.722	1.317	4.547	1.941	2.063
P value	0.7011	0.5638	0.7927	0.697	0.5176	0.1029	0.379	0.3564
Passed normality test (alpha=0.05)?	Yes	Yes	Yes	Yes	Yes	Yes	Yes	Yes
P value summary	ns	ns	ns	ns	ns	ns	ns	ns
Shapiro-Wilk test
W	0.9567	0.9383	0.9267	0.9309	0.9633	0.8742	0.9219	0.8518
P value	0.7474	0.5339	0.4158	0.4572	0.823	0.1119	0.3733	0.0611
Passed normality test (alpha=0.05)?	Yes	Yes	Yes	Yes	Yes	Yes	Yes	Yes
P value summary	ns	ns	ns	ns	ns	ns	ns	ns
Kolmogorov-Smirnov test
KS distance	0.1416	0.21	0.1845	0.1418	0.1719	0.229	0.1988	0.2487
P value	>0.1000	>0.1000	>0.1000	>0.1000	>0.1000	>0.1000	>0.1000	0.08
Passed normality test (alpha=0.05)?	Yes	Yes	Yes	Yes	Yes	Yes	Yes	Yes
P value summary	ns	ns	ns	ns	ns	ns	ns	ns
Number of values	10	10	10	10	10	10	10	10
Two-tailed Student's T-test
Table Analyzed	Data 1	Table Analyzed	Data 2	Table Analyzed	Data 3	Table Analyzed	Data 4
Column C	Intracellular bradyzoites without Ca2+	Column E	Intracellular bradyzoites added with Ca2+	Column G	Extracellular bradyzoites without Ca2+	Column I	Extracellular bradyzoites added with Ca2+
vs.	vs.	vs.	vs.	vs.	vs.	vs.	vs.
Column B	Intracellular tachyzoites without Ca2+	Column D	Intracellular tachyzoites added with Ca2+	Column F	Extracellular tachyzoites without Ca2+	Column H	Extracellular tachyzoites added with Ca2+
Unpaired t test		Unpaired t test		Unpaired t test		Unpaired t test
P value	<0.0001	P value	<0.0001	P value	<0.0001	P value	<0.0001
P value summary	****	P value summary	****	P value summary	****	P value summary	****
Significantly different (P < 0.05)?	Yes	Significantly different (P < 0.05)?	Yes	Significantly different (P < 0.05)?	Yes	Significantly different (P < 0.05)?	Yes
One- or two-tailed P value?	Two-tailed	One- or two-tailed P value?	Two-tailed	One- or two-tailed P value?	Two-tailed	One- or two-tailed P value?	Two-tailed
t, df	t=10.58, df=18	t, df	t=6.064, df=18	t, df	t=7.065, df=18	t, df	t=5.234, df=18
How big is the difference?		How big is the difference?		How big is the difference?		How big is the difference?
Mean of column A	1.078	Mean of column C	1.272	Mean of column E	1.224	Mean of column G	2.091
Mean of column B	0.6739	Mean of column D	0.761	Mean of column F	0.9071	Mean of column H	1.373
Difference between means (B - A) ± SEM	-0.4036 ± 0.03817	Difference between means (D - C) ± SEM	-0.5111 ± 0.08429	Difference between means (F - E) ± SEM	-0.3169 ± 0.04486	Difference between means (H - G) ± SEM	-0.7181 ± 0.1372
95% confidence interval	-0.4838 to -0.3234	95% confidence interval	-0.6882 to -0.3340	95% confidence interval	-0.4112 to -0.2227	95% confidence interval	-1.006 to -0.4298
R squared (eta squared)	0.8614	R squared (eta squared)	0.6713	R squared (eta squared)	0.735	R squared (eta squared)	0.6034
F test to compare variances		F test to compare variances		F test to compare variances		F test to compare variances
F, DFn, Dfd	1.004, 9, 9	F, DFn, Dfd	1.506, 9, 9	F, DFn, Dfd	2.209, 9, 9	F, DFn, Dfd	1.134, 9, 9
P value	0.9952	P value	0.5519	P value	0.2534	P value	0.8549
P value summary	ns	P value summary	ns	P value summary	ns	P value summary	ns
Significantly different (P < 0.05)?	No	Significantly different (P < 0.05)?	No	Significantly different (P < 0.05)?	No	Significantly different (P < 0.05)?	No
Data analyzed		Data analyzed		Data analyzed		Data analyzed
Sample size, column B	10	Sample size, column D	10	Sample size, column F	10	Sample size, column H	10
Sample size, column C	10	Sample size, column E	10	Sample size, column G	10	Sample size, column I	10
	Intracellular tachyzoites without Ca2+	Intracellular bradyzoites without Ca2+	Intracellular tachyzoites added with Ca2+	Intracellular bradyzoites added with Ca2+	Extracellular tachyzoites without Ca2+	Extracellular bradyzoites without Ca2+	Extracellular tachyzoites added with Ca2+
Number of values	10	10	10	10	10	10	10
Minimum	0.9409	0.5183	0.9309	0.5007	0.9941	0.8299	1.705
Maximum	1.194	0.7847	1.596	0.979	1.429	1.079	2.547
Range	0.253	0.2665	0.665	0.4782	0.4345	0.2495	0.841
Mean	1.078	0.6739	1.272	0.761	1.224	0.9071	2.091
Std. Deviation	0.08543	0.08525	0.2066	0.1684	0.1177	0.07919	0.297
Std. Error of Mean	0.02701	0.02696	0.06534	0.05325	0.03722	0.02504	0.09393
