# Supplementary material for: Toxoplasma bradyzoites exhibit physiological plasticity of calcium and energy stores controlling motility and egress
Source: eLife. 2021 Dec 3;10:e73011. doi: 10.7554/eLife.73011 (PMC8683080; doi:10.7554/eLife.73011)
Supplement: Figure 6—source data 3. [file elife-73011-fig6-data3.xlsx]

## Sheet: Sheet1
Figure 6E	Calcium repsonses of GCaMP6f ratiometric reporter tachyzoites and bradyzoites treated with different calcium agonists
	FGCaMP6f/FmTagBFP2 ratios
	Time (min)	Tachy-Ionomycin					Brady-Ionomycin					Tachy-Thapsigargin					Brady-Thapsigargin					Tachy-NH4Cl					Brady-NH4Cl
	0	1.11555	1.20501	1.10517	1.06091	1.08835	0.5578	0.597052	0.684183	0.707074	0.711807	1.11612	1.11469	1.13855	1.14607	1.10011	0.556351	0.533962	0.534499	0.48234	0.521634	1.06565	0.965493	1.10925	1.13776	1.2055	0.772948	0.738474	0.714494	0.762323	0.722812
	0.166667	1.04559	1.02596	1.01062	0.976086	0.993886	0.556747	0.685371	0.606119	0.726067	0.724367	1.13914	1.10126	1.12656	1.1098	1.12614	0.490029	0.514238	0.610187	0.5246	0.561596
	0.25																					1.01083	1.07784	1.11085	1.15171	1.11111	0.669171	0.722864	0.889024	0.756757	0.746406
	0.333333	1.01714	1.01798	1.1431	1.02255	1.04105	0.66348	0.651297	0.581451	0.758593	0.744794	1.0695	1.18251	1.11706	1.21163	1.18312	0.594364	0.628538	0.412014	0.575135	0.610346
	0.5	1.16571	0.990862	0.945975	1.05083	1.06918	0.67389	0.657532	0.629932	0.759176	0.786967	1.19446	1.07981	1.10401	1.31365	1.19311	0.684395	0.46062	0.494492	0.576222	0.62354	1.08089	0.927848	1.11344	1.15715	1.16502	0.74732	0.846349	0.82976	0.740628	0.753574
	0.666667	1.00896	1.00678	0.923749	1.07305	1.06688	0.628922	0.696171	0.659617	0.772644	0.782798	1.10264	1.08024	1.19657	1.27734	1.16763	0.545291	0.468637	0.55892	0.586765	0.620537
	0.75																					1.06043	1.0747	1.05197	1.16132	1.15593	0.733235	0.798976	0.856554	0.749528	0.720725
	0.833333	0.971458	1.00942	1.04286	1.05201	1.04709	0.661387	0.660563	0.66276	0.782848	0.806217	1.04269	1.08668	1.25432	1.2167	1.25736	0.437328	0.534548	0.66607	0.595128	0.664852
	1	1.07272	0.970214	1.05551	1.00874	1.0573	0.5862	0.713479	0.669907	0.769223	0.777716	1.33809	1.33159	1.31235	1.23807	1.23465	0.541341	0.563916	0.542271	0.609655	0.644239	0.98968	1.12961	1.01947	1.16326	1.12822	0.838304	0.809293	0.779538	0.770179	0.729767
	1.16667	1.43192	1.1943	1.30475	1.07364	1.11459	0.638042	0.55961	0.789452	0.772787	0.795753	1.36989	1.38065	1.43833	1.1516	1.20442	0.469286	0.618398	0.537773	0.624514	0.641714
	1.25																					2.13786	2.02277	2.14277	2.02007	2.04793	0.829607	0.720859	0.757827	0.746851	0.73671
	1.33333	3.24888	3.18845	3.24836	2.12195	2.07564	0.723217	0.561896	0.705942	0.797431	0.779248	1.49483	1.55623	1.45534	1.28927	1.26213	0.565142	0.564844	0.565224	0.62563	0.630194
	1.5	4.0031	4.21914	4.02071	2.87814	2.7774	0.698489	0.750045	0.661999	0.762396	0.801808	1.8997	1.94384	1.80527	1.53718	1.30747	0.575109	0.579247	0.527081	0.641457	0.641756	2.39355	2.29978	2.52841	2.36553	2.38205	0.922368	0.816325	0.774202	0.839199	0.943673
	1.66667	4.34883	4.43887	4.46524	3.9452	4.06855	0.79814	0.773097	0.805234	0.763131	0.788483	1.96796	1.97984	2.01123	1.5784	1.38182	0.636822	0.528472	0.54575	0.645013	0.675649
	1.75																					2.22576	2.32661	2.16968	2.21337	2.33953	0.880578	0.853037	0.918553	0.867155	1.09606
	1.83333	4.5324	4.51764	4.49623	4.47443	4.01879	0.761052	0.873825	0.782526	0.812493	0.811026	1.99905	2.08679	2.12818	1.78238	1.48161	0.566092	0.581025	0.565484	0.645068	0.65667
	2	4.2447	4.2088	4.26131	4.55293	4.57868	0.931354	0.720984	0.811352	1.10088	0.83284	2.09617	2.21777	2.27259	1.83984	1.76768	0.533684	0.52494	0.677446	0.634059	0.650674	2.11215	2.10798	2.12908	2.1247	2.23358	0.780865	0.952869	0.805032	0.801986	1.081
	2.16667	4.25586	4.06948	4.09917	4.38871	4.40147	0.968175	1.16784	1.11362	1.44717	1.08002	2.27321	2.37093	2.19408	1.8443	1.69666	0.482643	0.679424	0.583372	0.658893	0.661507
	2.25																					2.02366	2.04236	2.06302	1.99684	2.12877	0.833203	0.871693	0.86086	0.807779	1.03673
	2.33333	4.1351	4.06621	4.18188	4.24164	4.65245	1.2788	1.2429	1.34262	1.73746	1.54184	2.55965	2.57197	2.39303	1.73848	1.8325	0.590056	0.573192	0.578624	0.671332	0.687429
	2.5	3.93138	3.93521	3.93477	4.20548	4.54585	1.44203	1.36653	1.41094	2.11622	2.05949	2.70448	2.7107	2.60592	1.9043	2.12664	0.473562	0.707761	0.619742	0.643995	0.6706	2.07591	2.02094	2.02704	2.02749	1.98709	0.909168	0.962674	0.935306	0.786171	0.907983
	2.66667	3.90152	3.85425	3.87348	4.07888	4.36907	1.59522	1.49382	1.6513	2.40445	2.46403	2.66557	2.80619	2.65562	1.9606	2.20271	0.628818	0.626762	0.631051	0.648494	0.677271
	2.75																					1.95207	1.883	1.86541	1.95503	1.91552	0.94112	0.960253	1.05118	0.743258	0.862869
	2.83333	3.74146	3.73348	3.77831	4.14226	4.36633	1.63796	1.61949	1.67836	2.65603	2.65376	2.85063	2.70238	2.64153	2.12405	2.38195	0.668432	0.638687	0.657281	0.67011	0.692661
	3	3.57711	3.61336	3.64458	4.24134	4.35502	1.73894	1.55934	1.62396	2.65649	2.7292	2.83192	2.79324	2.9095	2.30008	2.55396	0.637617	0.586016	0.700369	0.64697	0.671597	1.96319	1.82293	2.06099	1.84943	1.92992	1.01063	0.954142	0.938974	0.787603	0.875434
	3.16667	3.43285	3.57118	3.34269	3.80452	4.20153	1.68783	1.68788	1.61686	2.69205	2.75007	2.8789	2.95467	2.80332	2.34116	2.96544	0.644395	0.624175	0.629962	0.654357	0.668559
	3.25																					1.77459	1.80713	1.83319	1.83858	1.82399	0.973889	0.875683	1.06052	0.755635	0.873519
	3.33333	3.39864	3.22174	3.4321	3.89253	4.11321	1.72364	1.72413	1.58072	2.57602	2.74913	2.82399	2.85264	2.98447	2.32077	2.87189	0.638021	0.656527	0.652671	0.669098	0.681599
	3.5	3.19926	3.19455	3.18578	3.57132	3.81318	1.76935	1.67944	1.6417	2.62299	2.74569	2.93893	2.94346	2.79694	2.25955	2.63324	0.657179	0.667888	0.65409	0.671536	0.68971	1.66787	1.63806	1.81859	1.82796	1.72934	0.980923	0.923266	0.968416	0.720387	0.826575
	3.66667	3.12124	2.957	3.17345	3.83914	3.85842	1.63531	1.6371	1.63533	2.53732	2.63788	2.91024	2.94593	2.88843	2.24126	2.65335	0.734515	0.586726	0.660364	0.646881	0.684278
	3.75																					1.66969	1.74011	1.70365	1.71381	1.77812	1.00826	0.937098	0.872853	0.75762	0.82276
	3.83333	2.91665	2.89263	2.89532	3.58637	3.74314	1.55352	1.63798	1.65185	2.46961	2.6139	2.85777	2.86426	2.9844	2.24412	2.60249	0.660316	0.778204	0.566024	0.657353	0.691269
	4	2.98517	2.82379	2.75552	3.52191	3.78919	1.56654	1.65842	1.61053	2.38834	2.52349	2.87637	3.00311	2.9425	2.46368	2.87669	0.630435	0.696752	0.685714	0.695587	0.703063	1.64168	1.61019	1.73478	1.78315	1.73519	1.01327	0.80001	0.903758	0.72248	0.85025
	4.16667	2.85102	2.83771	2.66509	3.36952	3.56455	1.53882	1.63093	1.44693	2.3242	2.42771	3.02306	2.93458	2.98837	2.43478	2.70337	0.698477	0.621378	0.69127	0.689091	0.689962
	4.25																					1.62268	1.61029	1.61634	1.65883	1.6972	0.896761	0.884078	0.905295	0.718215	0.832519
	4.33333	2.80214	2.72176	2.7868	3.44964	3.56473	1.5298	1.55208	1.48582	2.15354	2.35474	3.07831	3.07584	3.12945	2.29966	2.80857	0.706263	0.582617	0.72223	0.717794	0.689437
	4.5	2.73049	2.6254	2.51564	3.23867	3.36728	1.5091	1.53393	1.36637	2.20858	2.26259	3.17915	3.21375	3.18136	2.43837	3.11681	0.651956	0.760017	0.648565	0.69047	0.695712	1.60181	1.45595	1.60091	1.63437	1.62843	0.935171	0.870929	0.892654	0.783859	0.835527
	4.66667	2.63848	2.63764	2.6328	3.27933	3.43607	1.48267	1.33846	1.45939	2.11263	2.23645	3.22033	3.19455	3.20964	2.58933	3.09798	0.682545	0.661132	0.690575	0.678586	0.696955
	4.75																					1.66238	1.43245	1.4949	1.59386	1.59293	0.789316	0.985202	0.911625	0.754604	0.873809
	4.83333	2.43879	2.45649	2.63204	3.16079	3.15166	1.47148	1.26392	1.28565	2.04033	2.1898	3.18955	3.21644	3.21128	2.58542	3.39843	0.755597	0.552616	0.679194	0.71202	0.705562
	5	2.48991	2.48835	2.48854	3.07141	3.08089	1.42465	1.24763	1.23672	1.96503	2.06894	3.16352	3.126	3.08017	2.70987	3.47994	0.768403	0.724147	0.5671	0.687155	0.70398	1.52497	1.6402	1.53361	1.66934	1.64265	0.913439	0.82337	0.904336	0.822858	0.834231
	5.16667	2.3835	2.41956	2.46481	2.83424	2.99728	1.2456	1.2317	1.2265	1.88004	2.04369	3.09481	3.06432	3.11447	2.62694	3.55473	0.652018	0.774375	0.626546	0.691821	0.684382
	5.25																					1.54178	1.48574	1.48994	1.61234	1.55515	1.00827	0.831121	0.832541	0.827662	0.792511
	5.33333	2.29871	2.41144	2.38328	2.97158	2.78994	1.12203	1.3152	1.27362	1.87255	1.94757	2.99568	2.877	3.08186	2.61329	3.43287	0.688082	0.684514	0.685707	0.709109	0.707191
	5.5	2.41832	2.36963	2.37517	2.97977	2.74434	1.19652	1.18718	1.18564	1.77111	1.95731	2.93771	2.90127	2.78772	2.61574	3.47914	0.721864	0.684035	0.655929	0.731491	0.688701	1.40065	1.61305	1.52002	1.56323	1.60644	0.856875	0.864562	0.859532	0.848676	0.833507
	5.66667	2.40143	2.30124	2.39013	2.8488	2.83796	1.17064	1.16803	1.17007	1.75595	1.91376	2.88395	2.75054	2.95467	2.63562	3.30044	0.687606	0.692331	0.71436	0.704857	0.721898
	5.75																					1.54459	1.52624	1.36156	1.54406	1.46491	0.997587	0.774673	0.830439	0.797661	0.803595
	5.83333	2.23474	2.10157	2.09553	2.80043	2.66083	1.14314	1.14074	1.13825	1.74713	1.83778	2.85502	2.81506	2.92528	2.61601	3.41042	0.706102	0.718846	0.66504	0.747678	0.714034
	6	2.18397	2.19195	2.17646	2.63051	2.62169	1.11835	1.09404	1.12728	1.63809	1.79415	2.77783	2.77566	2.94542	2.82788	3.26133	0.705815	0.65877	0.722918	0.738497	0.708141	1.53037	1.45198	1.47795	1.57048	1.43128	0.903472	0.838073	0.832408	0.779459	0.767442
	6.16667	2.16868	2.03617	2.24418	2.58739	2.67212	1.07628	1.11361	1.11043	1.60301	1.78639	2.83129	2.83971	2.84803	2.82023	3.34462	0.697139	0.694824	0.679858	0.756204	0.698446
	6.25																					1.47473	1.47752	1.47185	1.4478	1.41624	0.841025	0.745295	0.974912	0.733755	0.701211
	6.33333	2.25117	2.13779	2.02367	2.52919	2.48909	1.1405	1.02098	1.05576	1.60855	1.71286	2.92176	2.71806	2.71492	2.91418	3.44263	0.677842	0.823485	0.582696	0.729793	0.707027
	6.5	1.87725	2.09834	2.06356	2.55309	2.58011	1.04888	1.09594	1.08323	1.5174	1.71188	2.71529	2.87925	2.69619	3.16586	3.54178	0.71888	0.703889	0.657044	0.697755	0.708372	1.45878	1.35833	1.33144	1.45565	1.44684	0.752425	0.962904	0.875186	0.717841	0.775832
	6.66667	1.98235	1.97671	2.02411	2.43538	2.4835	1.02124	1.04222	1.00873	1.45459	1.69436	2.79748	2.78061	2.77528	3.45999	3.69846	0.68853	0.687202	0.717697	0.715572	0.723999
	6.75																					1.4268	1.42435	1.3632	1.43298	1.34772	0.828953	0.877772	0.855161	0.723343	0.750972
	6.83333	1.97215	1.94716	2.08879	2.33749	2.42864	0.985706	1.00712	1.05313	1.52535	1.62664	2.69474	2.77662	2.74033	3.47912	3.40394	0.675536	0.655967	0.755437	0.707274	0.740211
	7	1.98927	2.02215	2.02304	2.26436	2.30528	0.912475	0.991325	0.938673	1.40632	1.59927	2.7058	2.6123	2.61016	3.52594	3.50932	0.660981	0.649599	0.764286	0.754192	0.724849	1.43723	1.27992	1.40711	1.53574	1.3682	0.824695	0.908116	0.806125	0.723527	0.758118
	7.16667	1.85822	1.95331	1.96057	2.24676	2.38148	0.968486	0.980475	0.995944	1.38915	1.52613	2.44499	2.52752	2.66237	3.3194	3.50927	0.756047	0.612185	0.70247	0.735277	0.753008
	7.25																					1.45947	1.2906	1.32641	1.48678	1.30238	0.875111	0.870199	0.873417	0.728824	0.7934
	7.33333	1.88271	1.88543	1.87205	2.28095	2.16764	0.98285	0.88764	0.93853	1.4039	1.52798	2.48089	2.34706	2.52711	3.17836	3.42375	0.779804	0.68654	0.61521	0.739054	0.728204
	7.5	1.79988	1.88719	1.89563	2.1208	2.32191	0.909346	0.91513	0.92476	1.31044	1.48507	2.34437	2.40512	2.39648	3.70127	3.33757	0.739257	0.612453	0.735345	0.720927	0.715293	1.41835	1.31855	1.26191	1.37684	1.22925	0.748501	0.881566	0.90328	0.689248	0.765983
	7.66667	1.7988	1.80216	1.80988	2.10891	2.14113	0.853865	0.967	0.918533	1.27734	1.40968	2.38039	2.40829	2.33251	3.40063	3.57619	0.724229	0.617466	0.745924	0.702369	0.719511
	7.75																					1.28175	1.23083	1.37528	1.28468	1.24656	0.811674	0.868394	0.783586	0.70731	0.800896
	7.83333	1.77694	1.75944	1.91643	2.06051	2.18124	0.909626	0.898009	0.891603	1.23041	1.40306	2.31325	2.41605	2.19617	3.24838	3.35624	0.65886	0.666345	0.768352	0.719011	0.742593
	8	1.72657	1.7393	1.71468	2.09653	2.06582	0.847193	0.829043	0.844652	1.23359	1.36861	2.21081	2.25253	2.23875	3.3082	3.25657	0.722611	0.60951	0.756857	0.728298	0.720716	1.25789	1.26631	1.25694	1.31618	1.26107	0.783861	0.798315	0.807621	0.746086	0.896132
	8.16667	1.63395	1.79716	1.66606	1.99627	2.06232	0.92482	0.870954	0.764651	1.23022	1.36924	2.1497	2.29103	2.09036	3.1555	3.45064	0.623932	0.810255	0.658133	0.753961	0.765877
	8.25																					1.24467	1.26188	1.31344	1.41153	1.22149	0.790138	0.913338	0.775331	0.744949	0.890413
	8.33333	1.69131	1.67272	1.65912	1.90848	2.07247	0.820719	0.873135	0.76503	1.17148	1.31433	2.05816	2.09963	2.14968	2.97766	3.22564	0.803665	0.668878	0.603649	0.778419	0.728537
	8.5	1.69408	1.68739	1.69562	1.93028	2.09109	0.846229	0.770937	0.794465	1.16155	1.27166	1.89752	1.91362	1.90452	3.27761	3.29264	0.648982	0.706311	0.74096	0.749696	0.725749	1.28205	1.31646	1.29805	1.29587	1.16277	0.86074	0.717154	0.832408	0.751751	0.792783
	8.66667	1.60784	1.64564	1.66032	1.79692	2.00105	0.737241	0.802263	0.779979	1.13438	1.26474	1.72849	1.88068	1.82274	3.23945	3.2812	0.666149	0.668399	0.762014	0.714536	0.735897
	8.75																					1.28744	1.20106	1.23879	1.24303	1.24798	0.806217	0.833878	0.777779	0.780835	0.793436
	8.83333	1.57852	1.52239	1.58127	1.87199	1.93	0.804896	0.820463	0.783536	1.13468	1.21016	1.82204	1.87826	1.89366	3.16692	3.23422	0.811329	0.629221	0.662555	0.73186	0.695643
	9	1.58713	1.4788	1.62986	1.82143	2.03918	0.702353	0.866361	0.690769	1.11288	1.21833	1.85404	1.79257	1.89916	3.12875	3.23535	0.678153	0.682403	0.746998	0.728061	0.727443	1.24215	1.15076	1.37051	1.18744	1.21074	0.920477	0.805959	0.783811	0.790562	0.709547
	9.16667	1.57499	1.60404	1.56139	1.72371	1.87702	0.721154	0.794662	0.668143	1.10678	1.16565	1.76634	1.82298	1.83181	3.03838	3.2463	0.593035	0.762327	0.639263	0.735876	0.743365
	9.25																					1.33853	1.11163	1.24038	1.19567	1.11828	0.856805	0.804299	0.821104	0.781946	0.773709
	9.33333	1.62035	1.54789	1.4849	1.76717	1.92882	0.677631	0.795152	0.652251	1.0418	1.11413	1.78463	1.78931	1.79133	2.97387	3.14015	0.746434	0.675078	0.67637	0.7771	0.736978
	9.5						0.790392	0.694573	0.714917	1.03047	1.16172	1.58758	1.75257	1.77413	2.94599	3.10311	0.635951	0.659636	0.672581	0.729989	0.750192	1.2044	1.15365	1.16588	1.19437	1.12662	0.749429	0.81407	0.827053	0.749888	0.756017
	9.75						0.713696	0.725851	0.719556	1.04798	1.15229	1.58288	1.78118	1.64909	2.91567	3.06031	0.704893	0.708732	0.702357	0.779109	0.747484
	10						0.725888	0.572788	0.777904	1.05583	1.08509	1.57762	1.6397	1.65646	2.92625	3.01859	0.719793	0.81528	0.574019	0.725737	0.738704	1.14847	1.12143	1.14032	1.29157	1.26833	0.765112	0.878772	0.691409	0.725911	0.817662
		#1	#2	#3	#4	#5	#1	#2	#3	#4	#5	#1	#2	#3	#4	#5	#1	#2	#3	#4	#5	#1	#2	#3	#4	#5	#1	#2	#3	#4	#5
