# Supplementary material for: Toxoplasma bradyzoites exhibit physiological plasticity of calcium and energy stores controlling motility and egress
Source: eLife. 2021 Dec 3;10:e73011. doi: 10.7554/eLife.73011 (PMC8683080; doi:10.7554/eLife.73011)
Supplement: Figure 6—source data 4. [file elife-73011-fig6-data4.xlsx]

## Sheet: Sheet1
Figure 6F	Calcium repsonses of extracellular GCaMP6f ratiometric reporter tachyzoites and bradyzoites treated with different calcium agonists
	FGCaMP6f/FmTagBFP2 ratios
	Time (min)	Tachy-Ionomycin										Brady-Ionomycin										Tachy-Thapsigargin										Brady-Thapsigargin										Tachy-NH4Cl
	0	1.00207	1.06646	0.986924	1.29782	1.15323	0.849332	0.870669	0.970957	0.970461	0.82156	0.684745	0.662061	0.669537	0.701729	0.646908	0.766681	0.807461	0.825631	0.810531	0.791908	0.715731	0.718578	1.02106	0.941825	0.887405	0.905911	0.78773	0.820301	0.843189	0.781641	0.567068	0.610705	0.708597	0.706695	0.782082	0.654747	0.826499	0.627941	0.694042	0.760001	1.10597	1.16002	1.08053	0.945177	1.06028	1.23304	1.39158	1.40145
	0.166667	1.0959	0.953231	1.1101	1.08904	1.02405	0.763717	0.875909	0.930782	0.893468	0.757742	0.641444	0.651816	0.736057	0.552598	0.600398	0.758288	0.793086	0.79815	0.816064	0.80564	0.757229	0.75394	1.02805	1.15492	1.07069	0.865782	0.90435	0.976968	0.994084	1.02663	0.532773	0.757086	0.606176	0.694839	0.682918	0.668488	0.734237	0.767112	0.727293	0.702195
	0.25																																									0.913981	1.00512	1.04824	0.878849	1.02661	1.34879	1.50173	1.5118
	0.333333	1.09935	1.0012	1.15893	1.16947	1.30896	0.746069	0.832768	0.928579	0.888162	0.718218	0.626716	0.638451	0.813035	0.696439	0.782294	0.820742	0.853355	0.836202	0.817211	0.823008	0.753822	0.755103	1.0071	1.01883	1.08428	1.08291	1.44521	1.52304	1.60947	1.58717	0.516053	0.646496	0.552739	0.691892	0.61705	0.614793	0.736164	0.695254	0.805625	0.682222
	0.5	1.38447	1.19457	1.0135	1.49575	1.58317	1.40801	1.28084	1.13156	1.00809	1.27038	0.901582	0.565838	0.740094	0.851215	0.694235	0.923144	0.891151	0.9118	0.926416	0.914222	0.719214	0.715905	1.16319	1.1928	1.23596	1.12487	1.18233	1.41072	1.53569	1.56279	0.612905	0.744994	0.504898	0.665975	0.616955	0.832576	0.66436	0.710725	0.726642	0.571989	1.01866	0.905381	0.980251	0.830401	1.13228	1.48065	1.57608	1.57899
	0.666667	2.30525	2.39913	2.00215	2.5706	2.31296	3.43527	3.34079	3.09945	2.87527	3.27417	1.02264	0.878549	0.899313	0.971733	0.868685	1.07503	1.04172	1.06702	1.06367	1.03097	1.33717	1.29754	1.36148	1.42456	1.48554	1.26197	0.79505	0.939666	1.05214	1.18514	0.604518	0.660102	0.627823	0.692746	0.684518	0.746396	0.599764	0.672248	0.813735	0.610395
	0.75																																									1.84458	1.03514	1.85201	1.15138	1.74677	1.78435	2.06629	1.6883
	0.833333	2.9614	3.06346	3.11775	3.36301	3.05455	4.00941	3.85327	3.56814	3.39413	3.6401	1.04953	0.890417	0.916821	1.14637	0.957273	1.07627	1.06521	1.09943	1.1057	1.08155	3.35419	3.1495	1.40333	1.50042	1.49608	1.31818	2.50829	3.04547	3.66695	4.1049	0.719846	0.812641	0.666663	0.860406	0.712556	0.748169	0.605085	0.769916	0.789015	0.703216
	1	3.01645	3.16153	3.33015	3.25473	3.1402	4.13854	3.84626	3.83036	3.45204	3.98175	1.09749	0.924681	1.14694	1.19654	1.13312	1.10363	1.09491	1.10842	1.09977	1.05921	3.93226	3.88135	1.63032	1.66244	1.56769	1.69451	2.28692	2.80419	3.29585	3.71514	0.755695	0.749987	0.723214	0.820737	0.841916	0.875803	0.719322	0.818029	0.797891	0.881515	1.92857	1.8859	1.93615	1.32282	1.94463	3.25452	3.5164	3.19697
	1.16667	2.96324	3.35738	3.31464	3.27237	3.02751	4.11229	3.91332	3.87839	3.46502	4.02262	1.18988	1.07193	1.18216	1.25621	1.08336	1.10875	1.13934	1.1836	1.19325	1.19002	4.06419	3.90002	1.70675	1.79326	1.65446	1.82811	2.19176	2.72135	3.08432	3.49772	0.855679	0.840738	0.834766	0.861272	0.798748	0.913411	0.959253	0.71848	0.856375	0.840085
	1.25																																									1.82577	1.89916	1.90297	1.7405	1.88256	3.57083	3.66348	3.39517
	1.33333	2.94909	3.00032	3.07228	3.07303	3.06717	3.88	3.8825	3.48861	3.27988	3.76261	1.20812	1.15211	1.1629	1.24078	1.19884	1.23912	1.21705	1.25675	1.27778	1.29732	4.09048	4.03042	1.69924	1.81953	1.78075	1.80293	2.20269	2.73838	3.12474	3.51162	0.733267	0.970809	0.841379	0.911387	0.800515	0.912545	0.802051	0.890432	0.695957	0.818745
	1.5	2.89357	3.01756	3.05076	2.92047	2.94279	3.72426	3.61841	3.4221	3.18355	3.45019	1.15739	1.2308	1.1241	1.19987	1.18856	1.2997	1.32143	1.36256	1.32782	1.32381	3.76314	3.76582	1.79113	1.80923	1.86033	2.00156	2.11245	2.54598	3.00153	3.41807	0.710102	0.867647	0.742899	0.761674	0.788007	0.777774	0.83073	0.773852	0.62133	0.755631	1.72421	1.73869	1.69763	1.67322	1.72481	3.40876	3.31837	3.25498
	1.66667	2.80836	2.91274	3.11257	3.05171	3.09061	3.648	3.68762	3.44546	3.11961	3.49992	1.30962	1.19742	1.14121	1.12792	1.1796	1.45588	1.41875	1.49065	1.46298	1.50561	3.7725	3.71087	1.6837	1.87185	1.91165	1.82482	2.11313	2.49965	2.92345	3.27154	0.719027	0.780468	0.65086	0.826826	0.817827	0.706404	0.748813	0.759664	0.561071	0.715436
	1.75																																									1.59533	1.68916	1.65027	1.55728	1.75975	3.31365	3.12524	3.10078
	1.83333	2.82696	2.8254	2.81182	2.99216	2.83214	3.56545	3.44949	3.37855	3.08826	3.43727	1.34892	1.22763	1.23038	1.14389	1.28788	1.40431	1.49248	1.47132	1.53102	1.54064	3.70829	3.59665	1.95945	1.90669	1.89105	1.93847	1.95359	2.47133	2.85296	3.20859	0.703387	0.775106	0.657515	0.823982	0.826807	0.765187	0.758418	0.844086	0.539293	0.655687
	2	2.80191	2.81183	2.76226	2.86586	2.90248	3.53846	3.49318	3.15549	2.88293	3.42584	1.30923	1.26706	1.28118	1.12345	1.2877	1.58715	1.63267	1.62761	1.63198	1.6509	3.63555	3.48869	1.96501	1.73417	1.90808	1.89847	1.90584	2.30791	2.63171	3.10538	0.729157	0.771747	0.615926	0.787066	0.744268	0.802236	0.813017	0.790823	0.478139	0.625143	1.54695	1.54126	1.61359	1.4411	1.70501	2.99355	2.79507	2.76901
	2.16667	2.7508	2.74384	2.83652	2.7732	2.63873	3.66216	3.43208	3.14673	2.8024	3.28327	1.26286	1.2087	1.24966	1.11604	1.20411	1.61635	1.6645	1.64011	1.63658	1.67025	3.56061	3.46996	2.06064	1.66089	1.81868	1.81583	1.87665	2.22617	2.61319	3.08104	0.713295	0.77791	0.551482	0.742073	0.766707	0.753934	0.767706	0.761377	0.492407	0.601212
	2.25																																									1.51238	1.5141	1.59707	1.31535	1.47753	2.63989	2.49003	2.38513
	2.33333	2.72114	2.67998	2.70131	2.74222	2.62858	3.51967	3.39273	3.13327	2.78702	3.27273	1.22471	1.13803	1.23615	1.03251	1.23462	1.59607	1.59877	1.70735	1.62752	1.68099	3.61478	3.40527	1.95491	1.63146	1.82069	1.82954	1.81274	2.09046	2.57906	3.08477	0.683712	0.769045	0.542461	0.724059	0.748804	0.741204	0.710373	0.741808	0.524001	0.580923
	2.5	2.6296	2.55083	2.60171	2.6816	2.45244	3.5783	3.53261	3.25122	2.86837	3.20974	1.16721	1.08611	1.19239	0.971414	1.19478	1.67763	1.66416	1.65782	1.64324	1.7612	3.54254	3.30045	1.86772	1.56624	1.78722	1.7733	1.7063	2.08943	2.44125	2.8879	0.656474	0.742102	0.549233	0.747982	0.749829	0.747935	0.715621	0.756968	0.532743	0.5707	1.50265	1.4323	1.46794	1.23589	1.45642	2.33293	2.19305	2.11517
	2.66667	2.55923	2.52656	2.53664	2.56892	2.41268	3.43549	3.34574	3.14699	2.98088	3.2467	1.16917	1.03572	1.11594	0.98407	1.13241	1.66969	1.69419	1.71003	1.69959	1.73751	3.58343	3.36925	1.8697	1.60805	1.84796	1.68968	1.70845	2.0065	2.42536	2.95829	0.65188	0.721816	0.429488	0.716853	0.718877	0.71736	0.737219	0.691694	0.514639	0.473599
	2.75																																									1.3913	1.32822	1.40497	1.25185	1.39485	1.99887	1.88559	1.82201
	2.83333	2.48093	2.55604	2.44683	2.57333	2.38221	3.42563	3.28092	2.97394	2.79093	3.22993	1.11307	0.925493	1.10844	0.828485	1.13766	1.65122	1.73603	1.68457	1.78046	1.80579	3.64815	3.27094	1.58658	1.79241	1.6398	1.82342	1.71495	2.01905	2.35094	2.94685	0.610713	0.724266	0.437215	0.704783	0.685408	0.730784	0.684275	0.714995	0.404536	0.452479
	3	2.36668	2.46671	2.33903	2.44122	2.37918	3.47639	3.26507	3.09228	2.70671	3.14999	1.033	0.912814	1.01116	0.787713	1.02707	1.66324	1.71955	1.7417	1.77423	1.76269	3.44746	3.26245	1.92752	1.8124	1.79278	1.75515	1.67365	2.01938	2.25166	2.8177	0.538024	0.716731	0.468252	0.656115	0.659117	0.692705	0.739207	0.692694	0.456117	0.493982	1.34689	1.20052	1.38554	1.24615	1.24417	1.76734	1.65457	1.54569
		#1	#2	#3	#4	#5	#6	#7	#8	#9	#10	#1	#2	#3	#4	#5	#6	#7	#8	#9	#10	#1	#2	#3	#4	#5	#6	#7	#8	#9	#10	#1	#2	#3	#4	#5	#6	#7	#8	#9	#10	#1	#2	#3	#4	#5	#6	#7	#8
[truncated: 12 more columns]
