# Supplementary material for: Toxoplasma bradyzoites exhibit physiological plasticity of calcium and energy stores controlling motility and egress
Source: eLife. 2021 Dec 3;10:e73011. doi: 10.7554/eLife.73011 (PMC8683080; doi:10.7554/eLife.73011)
Supplement: Figure 6—source data 5. [file elife-73011-fig6-data5.xlsx]

## Sheet: Sheet1
Figure 6G	Comparision of mRNA expression levels of SERCA and A1 in tachyzoites and bradyzoites by qPCR
	Genes	Relative expression in tachyzoites							Relative expression in bradyzoites
	SAG1	0.983717	1.00798	1.00851	0.969985	1.00204	1.02874		0.290618	0.226347	0.260121	0.067978	0.065896	0.066912
	BAG1	0.960795	1.00274	1.03796	0.947266	0.960569	1.09301		88.7155	132.921	205.702	307.573	289.294	295.311
	SERCA	0.983396	1.00312	1.01372	0.902971	0.890057	1.20825		0.430041	0.397622	0.394147	0.546649	0.469243	0.224213
	PMCA1	1.02196	0.96011	1.02155	1.04563	0.909897	1.0425		0.706658	0.696649	0.767292	0.510274	0.50622	0.44275
	A1	1.00379	1.08849	1.06904	1.10292	0.998978	0.739897		0.305685	0.340307	0.347572	0.96022	0.55553	0.889693
	A2	1.00745	1.01801	0.982308	0.95818	0.928685	1.10779		0.823154	0.725094	0.710368	0.352478	0.568436	0.4318
	Ca2+/H+exchanger	1.01028	0.990995	1.00909	0.876097	0.945774	1.16942		0.572883	0.566252	0.389466	0.529189	0.657601	0.717176
	TRPPL-2	0.834784	0.863145	1.05855	0.988852	1.14761	1.11148		0.599519	0.59602	0.72465	0.358943	0.415579	0.428392
		Independent Experiment #1			Independent Experiment #2				Independent Experiment #1			Independent Experiment #2
	actin1 was used as reference control
	Genes	P value	Mean of Tachyzoites	Mean of Bradyzoites	Difference	SE of difference	t ratio	df	q value
	SAG1	<0.000001	1	0.163	0.8372	0.04456	18.79	10	<0.000001
	SERCA	3e-06	1	0.4103	0.5899	0.06399	9.219	10	1.3e-05
	Ca2+/H+exchanger	3.5e-05	1	0.5721	0.4282	0.06079	7.044	10	9.5e-05
	PMCA1	5.4e-05	1	0.605	0.3953	0.05907	6.692	10	0.000109
	TRPPL-2	0.000109	1	0.5205	0.4802	0.0781	6.148	10	0.000175
	BAG1	0.00018	1	219.9	-218.9	37.93	5.771	10	0.000242
	A2	0.000504	1	0.6019	0.3985	0.07902	5.043	10	0.000582
	A1	0.007955	1	0.5665	0.434	0.1313	3.304	10	0.008034
	Mutiple t-test was used to compared the expression fold changes of different genes in the stage of tachyzoites and bradyzoites
		Tachyzoites			Bradyzoites
		Mean	SD	N	Mean	SD	N
		Tachyzoites			Bradyzoites
	SAG1	1	0.0206491	6	0.162979	0.107166	6
	BAG1	1	0.0565157	6	219.92	92.9142	6
	SERCA	1	0.114319	6	0.410319	0.107243	6
	PMCA1	1	0.0539329	6	0.604974	0.13426	6
	A1	1	0.134802	6	0.566501	0.292132	6
	A2	1	0.0618789	6	0.601888	0.183391	6
	Ca2+/H+exchanger	1	0.0972245	6	0.572094	0.112773	6
	TRPPL-2	1	0.129455	6	0.520517	0.140867	6
