# Supplementary material for: Toxoplasma bradyzoites exhibit physiological plasticity of calcium and energy stores controlling motility and egress
Source: eLife. 2021 Dec 3;10:e73011. doi: 10.7554/eLife.73011 (PMC8683080; doi:10.7554/eLife.73011)
Supplement: Figure 7—figure supplement 1—source data 1. [file elife-73011-fig7-figsupp1-data1.xlsx]

## Sheet: Sheet1
Figure 7 supplement 1A	Effects of trypsin treatment on tachyzoites calcium pools
	F/F0
Time (min)	Tachyzoites treated without trypsin										Tachyzoites treated with trypsin
0	1	1	1	1	1	1	1	1	1	1	1	1	1	1	1	1	1	1	1	1
0.25	0.925302	1.00186	0.928088	1.02696	1.01398	0.985021	1.0341	1.0242	1.01859	1.23132	1.0625	0.975742	0.96088	1.01887	0.966556	1.00837	1.05869	0.810806	1.05422	1.07653
0.5	0.964537	1.03806	0.957273	0.96298	1.01931	0.951867	1.06727	0.960063	0.945382	1.12374	1.04065	0.955092	0.97824	0.934974	0.941326	0.97956	1.07337	1.00036	0.991847	0.947755
0.75	1.15015	1.44442	1.23021	1.29685	1.35996	1.001	1.39712	1.00669	0.956192	1.46043	1.05813	0.942863	1.1868	1.01292	0.954821	0.975667	1.41697	0.823904	1.03384	0.980612
1	1.32118	1.87677	1.44758	1.6298	1.6751	2.05393	1.87938	2.96518	2.90954	1.89228	2.20083	2.00662	1.42958	2.09949	1.96968	2.84154	1.79653	2.36829	3.25377	2.95
1.25	2.02465	2.99907	2.39365	2.59438	2.76742	1.97144	3.05196	2.93036	2.83766	1.82299	2.14926	1.97494	2.1868	2.02318	1.98768	2.78703	2.99022	2.70366	3.0477	2.96429
1.5	1.96982	3.04317	2.44852	2.65151	2.81957	1.98023	2.94015	2.73342	2.51432	1.86631	2.06228	1.84904	2.20953	1.95795	1.85742	2.38622	3.02984	2.87393	2.84366	2.69571
1.75	2.03245	3.10072	2.265	2.47144	2.69219	1.82085	3.03758	2.37458	2.17865	1.73629	1.87041	1.80072	2.06259	1.80718	1.79679	2.12731	2.89704	2.7907	2.57093	2.50653
2	1.93863	3.04618	2.17161	2.44013	2.54372	1.80707	2.89631	2.19969	1.98653	1.74898	1.87609	1.79451	2.07384	1.80574	1.75435	1.85166	2.86941	2.78334	2.44517	2.38878
2.25	1.86418	2.91228	2.2183	2.51828	2.60098	1.72538	2.87799	2.05745	1.85454	1.60103	1.74563	1.66359	2.06528	1.76123	1.73616	1.78723	2.9731	2.68737	2.29922	2.27816
2.5	1.93561	2.86702	2.18141	2.43464	2.55215	1.65848	2.79077	1.9821	1.76105	1.53325	1.70957	1.60044	2.00905	1.62954	1.67006	1.69593	2.77452	2.56722	2.20995	2.24184
2.75	1.85639	2.81736	2.1646	2.37911	2.47847	1.62772	2.77569	1.6685	1.57026	1.44764	1.63746	1.5824	1.92323	1.63364	1.61275	1.47946	2.85033	2.47262	1.89931	1.96551
3	1.90895	2.78232	2.18071	2.41499	2.44075	1.69323	2.75342	1.74936	1.6264	1.44915	1.68073	1.57278	1.94303	1.56226	1.61197	1.50886	2.91074	2.29953	1.90501	1.95878
3.25	1.87374	2.62543	2.10297	2.41979	2.46715	1.57499	2.70169	1.64371	1.51052	1.38152	1.61342	1.49198	1.90831	1.54626	1.56562	1.42301	2.6833	2.28006	1.87199	1.89694
3.5	1.90971	2.68044	1.9972	2.29753	2.42166	1.53585	2.65646	1.50482	1.36355	1.41456	1.5354	1.51423	1.9198	1.50338	1.51144	1.30777	2.75373	2.14744	1.68589	1.74898
3.75	1.85815	2.6628	2.05884	2.3037	2.2905	1.43499	2.67803	1.52174	1.33226	1.39735	1.51595	1.40116	1.91051	1.45087	1.39351	1.29161	2.76938	2.06203	1.58092	1.56204
4	1.79603	2.72291	2.01401	2.22326	2.35064	1.42221	2.77708	1.32028	1.18509	1.35315	1.46722	1.38773	1.91125	1.40513	1.40681	1.09909	2.72756	2.09905	1.44048	1.5351
4.25	1.82067	2.59155	1.90054	2.25091	2.2976	1.46775	2.65994	1.32087	1.19932	1.25518	1.51726	1.40858	1.83252	1.40123	1.42011	1.13938	2.70898	2.0594	1.41602	1.48061
4.5	1.78999	2.52773	1.95681	2.22463	2.32068	1.4298	2.51195	1.21975	1.12289	1.38628	1.45673	1.36909	1.81932	1.39856	1.37982	1.06093	2.67816	1.99936	1.31859	1.37674
4.75	1.77767	2.56185	1.93509	2.20018	2.27896	1.34092	2.61007	1.1749	1.05614	1.31536	1.35358	1.26965	1.86944	1.3001	1.35322	1.02862	2.63365	2.07386	1.30942	1.28449
5	1.7583	2.45347	1.86575	2.23012	2.21194	1.36149	2.53329	1.09286	1.00986	1.27802	1.31971	1.26083	1.82225	1.39774	1.33933	1.00214	2.53289	1.99818	1.20546	1.30184
	#1	#2	#3	#4	#5	#6	#7	#8	#9	#10	#1	#2	#3	#4	#5	#6	#7	#8	#9	#10
