# Supplementary material for: Toxoplasma bradyzoites exhibit physiological plasticity of calcium and energy stores controlling motility and egress
Source: eLife. 2021 Dec 3;10:e73011. doi: 10.7554/eLife.73011 (PMC8683080; doi:10.7554/eLife.73011)
Supplement: Figure 7—source data 1. [file elife-73011-fig7-data1.xlsx]

## Sheet: Sheet1
Figure 7B	Calcium responses of GCaMP6f BAG1-mCherry reporter bradyzoites during liberation by trypsin
	Time (min)	GCaMP6f fluorescence intensity fold changes (F/F0)
		Control					Trypsin
	0	1	1	1	1	1	1	1	1	1	1
	0.25	1.00425	0.928998	0.921	0.952132	1.01785	0.853508	1.02602	0.973593	0.994748	1.06013
	0.5	0.977319	0.623363	1.0443	0.884231	0.999101	0.989247	0.81382	1.04143	0.912054	0.884091
	0.75	0.944538	0.803504	0.940889	1.02523	0.956221	0.91004	1.01507	0.955798	0.882878	0.756278
	1	0.90839	0.979304	0.873888	1.01667	1.01856	0.976549	1.01734	0.938415	0.875125	1.01051
	1.25	0.891645	0.859391	1.02423	1.02469	0.857289	1.02554	0.986003	0.957604	0.868873	0.956034
	1.5	0.888987	0.789706	1.04656	1.00375	0.970154	0.92962	0.909981	0.891899	0.838279	1.0252
	1.75	0.878887	0.616309	0.978166	0.916462	0.939802	0.90109	0.935414	0.854253	0.833611	1.04405
	2	0.873837	0.955585	0.891486	1.04127	0.851566	0.881481	0.879723	0.877257	0.825525	0.812234
	2.25	0.869939	0.856445	0.843579	0.939282	1.08401	0.919612	0.825085	0.908722	0.814188	0.930924
	2.5	0.850359	0.566313	0.926164	1.06242	0.900112	0.972803	0.933348	0.795091	0.810353	0.892953
	2.75	0.844689	0.825982	0.87908	0.957354	0.829186	0.968011	0.745469	0.942057	0.793098	0.800504
	3	0.831399	0.626153	0.906953	0.904623	0.912373	0.771738	0.947051	0.94285	0.792347	0.695369
	3.25	0.829007	0.802883	0.902157	0.95256	0.869583	0.840488	0.901653	0.872359	0.780202	0.771396
	3.5	0.821299	0.706922	0.910893	0.877351	0.875897	0.749024	0.915504	0.915757	0.77901	0.972456
	3.75	0.820944	0.819781	1.00522	0.871219	0.909631	0.729401	0.872874	0.918577	0.76117	1.10331
	4	0.816603	0.744283	0.976409	0.959264	0.930674	0.765554	0.817164	0.916846	0.756502	1.02059
	4.25	0.811376	0.779397	1.03149	0.907927	0.831352	0.86306	0.779648	0.794789	0.750518	0.834651
	4.5	0.782848	0.721649	0.918254	0.932363	0.94805	0.773167	0.900585	0.799817	0.729577	0.838648
	4.75	0.759812	0.677002	0.96974	0.844886	0.956603	0.873921	0.761639	0.815344	0.724241	0.742202
	5	0.715248	0.768855	0.914334	0.791425	0.900643	0.753864	0.895843	0.848099	0.706902	0.890434
		#1	#2	#3	#4	#5	#1	#2	#3	#4	#5
