# Supplementary material for: Toxoplasma bradyzoites exhibit physiological plasticity of calcium and energy stores controlling motility and egress
Source: eLife. 2021 Dec 3;10:e73011. doi: 10.7554/eLife.73011 (PMC8683080; doi:10.7554/eLife.73011)
Supplement: Figure 7—source data 2. [file elife-73011-fig7-data2.xlsx]

## Sheet: Sheet1
Figure 7D	Calcium fluctuation of extracellular single bradyzoites
		GCaMP6f fluorescence changes (F/F0) from 5 different single bradyzoites
	Time (s)	#1	#2	#3	#4	#5
	0	1	1	1	1	1
	1	1.66652	2.07159	1.27978	1.10422	1.0613
	2	1.57001	2.1403	1.71668	1.1609	1.13412
	3	1.68031	2.02252	2.10644	1.22943	1.28126
	4	1.76088	1.93072	2.05119	1.30746	1.31079
	5	2.44119	1.91339	2.13634	1.41167	1.34608
	6	2.39281	1.56005	2.12925	1.4665	1.43779
	7	2.07712	1.4567	2.08211	1.52453	1.53067
	8	2.29582	1.34007	2.01825	1.58092	1.60048
	9	2.23373	2.02367	1.90167	1.65549	1.65023
	10	2.00862	2.26051	1.8368	1.73983	1.73032
	11	2.00172	2.2224	1.65129	1.80023	1.51499
	12	1.79233	2.43072	1.43082	1.92034	1.3245
	13	1.74838	2.34065	1.32387	2.01795	1.20758
	14	1.95778	2.3343	1.53269	2.11289	1.12906
	15	1.93451	2.31062	1.65129	2.185	0.903012
	16	1.84791	2.09007	1.86931	1.92342	1.16092
	17	1.73072	1.91686	1.8814	1.63231	1.4256
	19	2.38087	1.79042	1.88545	1.3234	1.56803
	21	2.25032	1.72045	1.53855	1.24607	1.74278
	23	2.23309	1.6423	1.93766	1.16026	1.49034
	25	1.84791	1.60232	1.89661	1.07093	1.2342
	27	2.12322	1.55212	1.83832	1.10963	1.0245
	29	1.77596	1.51423	1.78561	1.13658	0.990301
	31	1.53038	1.72086	1.67866	1.16751	0.98232
	33	1.35847	1.92327	1.62696	1.24129	1.24343
	35	1.4218	1.90554	1.48839	1.32456	1.43491
	37	1.42783	1.82304	1.47026	1.24791	1.27429
	39	1.42697	1.92521	1.45393	1.10934	1.06624
	41	2.02542	1.84971	2.14536	0.939206	0.815211
	43	2.33305	1.80234	2.08454	1.1298	0.75918
	45	2.47695	1.73205	1.98167	1.23909	0.703825
	47	2.40758	1.7232	1.91689	1.35688	0.821492
	49	2.39509	1.70678	1.78557	1.52721	0.90363
	51	2.17449	1.68205	1.69016	1.50232	0.766982
	53	2.03705	1.7523	1.59064	1.2394	0.715026
	55	2.21758	1.65223	0.880749	0.834777	0.651621
	57	2.22706	1.5238	1.2996	1.2342	0.60742
	59	2.16157	1.50924	1.26276	1.31218	0.568059
