# Supplementary material for: Toxoplasma bradyzoites exhibit physiological plasticity of calcium and energy stores controlling motility and egress
Source: eLife. 2021 Dec 3;10:e73011. doi: 10.7554/eLife.73011 (PMC8683080; doi:10.7554/eLife.73011)
Supplement: Figure 7—source data 3. [file elife-73011-fig7-data3.xlsx]

## Sheet: Sheet1
Figure 7F	Effects of inhibition of calcium signling pathway on the gliding motility of tahcyzoites and bradyzoites
	Gliding trail length (µm)
	Tachyzoites+DMSO	Tachyzoites+3-MB-PP1	Tachyzoites+BAPTA-AM	Tachyzoites+Compound 1	Bradyzoites+DMSO	Bradyzoites+3-MB-PP1	Bradyzoites+BAPTA-AM	Bradyzoites+Compound 1		Reagents	Concentration	Functions
Independent experiment #1	74.7724	10.0625	0	9.84889	22.4633	1.52581	2.24978	0.81		DMSO	0.001	Control
	19.7777	1.7162	0	1.98767	25.858	1.21775	4.25822	0		3-MB-PP1	5 µM	Inhibiting CDPK1
	53.7144	1.3489	9.68156	2.925	8.7876	4.92352	2.85178	0		BAPTA-AM	25 µM	Chelating free Ca2+
	38.976	2.6222	5.83611	8.09811	23.2037	5.47216	4.13656	0		Compound 1	4 µM	Inhibiting PKG
	32.9393	0.8882	0	0.691889	8.8616	0.856291	5.28567	0
	32.1615	1.91	0	0	10.8916	0	0	1.02
Independent experiment #1	53.0056	1.8971	0	0	9.5756	0	0	0
	52.9294	8.8309	9.24544	0	6.9036	0	0	0
	37.238	3.3027	8.89467	0	22.1506	0	0	0
	30.1458	9.4866	7.22589	0	12.9041	0	0	0
	25.4535	4.9926	6.59611	0	13.1731	0	0	0
	42.374	2.9062	0	0	17.3101	0	0	0
	33.6112	0	0	0	2.8284	0	0	0
Independent experiment #1	64.4303	0	0	0	13.4178	0	0	0
	30.4898	0	0	0	3.2802	0	0	0
	44.8228	0	0	0	5.8747	0	0	0
	50.224	0	0	0	7.7253	0	0	0
	48.3237	0	0	0	3.8878	0	0	0
	44.229	0	0	0	9.2212	0	0	0
	37.4022	0	0	0	6.7951	0	0	0
Test for normal distribution
Anderson-Darling test
A2*	0.2632	1.917	3.599	4.629	0.7315	4.483	4.024	6.381
P value	0.6626	<0.0001	<0.0001	<0.0001	0.0473	<0.0001	<0.0001	<0.0001
Passed normality test (alpha=0.05)?	Yes	No	No	No	No	No	No	No
P value summary	ns	****	****	****	*	****	****	****
D'Agostino & Pearson test
K2	2.194	8.385	4.798	25.42	2.432	24.44	9.399	30.44
P value	0.3339	0.0151	0.0908	<0.0001	0.2964	<0.0001	0.0091	<0.0001
Passed normality test (alpha=0.05)?	Yes	No	Yes	No	Yes	No	No	No
P value summary	ns	*	ns	****	ns	****	**	****
Shapiro-Wilk test
W	0.9669	0.7509	0.6355	0.4941	0.9052	0.5033	0.5933	0.3613
P value	0.6878	0.0002	<0.0001	<0.0001	0.0517	<0.0001	<0.0001	<0.0001
Passed normality test (alpha=0.05)?	Yes	No	No	No	Yes	No	No	No
P value summary	ns	***	****	****	ns	****	****	****
Kolmogorov-Smirnov test
KS distance	0.09937	0.2253	0.4335	0.4135	0.1723	0.4186	0.4534	0.5265
P value	>0.1000	0.009	<0.0001	<0.0001	>0.1000	<0.0001	<0.0001	<0.0001
Passed normality test (alpha=0.05)?	Yes	No	No	No	Yes	No	No	No
P value summary	ns	**	****	****	ns	****	****	****
Number of values	20	20	20	20	20	20	20	20
		Kruskai-Wallis test with Dun's test for the correction of multiple comparisions
		Number of families	1
		Number of comparisons per family	3
		Alpha	0.05
		Dunn's multiple comparisons test	Mean rank diff.	Significant?	Summary	Adjusted P Value	A-?
		Tachyzoites+DMSO vs. Tachyzoites+3-MB-PP1	34.7	Yes	****	<0.0001	B	Tachyzoites+3-MB-PP1
		Tachyzoites+DMSO vs. Tachyzoites+BAPTA-AM	41.1	Yes	****	<0.0001	C	Tachyzoites+BAPTA-AM
		Tachyzoites+DMSO vs. Tachyzoites+Compound 1	44.2	Yes	****	<0.0001	D	Tachyzoites+Compound 1
		Test details	Mean rank 1	Mean rank 2	Mean rank diff.	n1	n2	Z
		Tachyzoites+DMSO vs. Tachyzoites+3-MB-PP1	70.5	35.8	34.7	20	20	4.974
		Tachyzoites+DMSO vs. Tachyzoites+BAPTA-AM	70.5	29.4	41.1	20	20	5.892
		Tachyzoites+DMSO vs. Tachyzoites+Compound 1	70.5	26.3	44.2	20	20	6.336
		Kruskai-Wallis test with Dun's test for the correction of multiple comparisions
		Number of families	1
		Number of comparisons per family	3
		Alpha	0.05
		Dunn's multiple comparisons test	Mean rank diff.	Significant?	Summary	Adjusted P Value	E-?
		Bradyzoites+DMSO vs. Bradyzoites+3-MB-PP1	37.38	Yes	****	<0.0001	F	Bradyzoites+3-MB-PP1
		Bradyzoites+DMSO vs. Bradyzoites+BAPTA-AM	36.78	Yes	****	<0.0001	G	Bradyzoites+BAPTA-AM
		Bradyzoites+DMSO vs. Bradyzoites+Compound 1	42.65	Yes	****	<0.0001	H	Bradyzoites+Compound 1
		Test details	Mean rank 1	Mean rank 2	Mean rank diff.	n1	n2	Z
		Bradyzoites+DMSO vs. Bradyzoites+3-MB-PP1	69.7	32.33	37.38	20	20	5.744
		Bradyzoites+DMSO vs. Bradyzoites+BAPTA-AM	69.7	32.93	36.78	20	20	5.652
		Bradyzoites+DMSO vs. Bradyzoites+Compound 1	69.7	27.05	42.65	20	20	6.555
	Tachyzoites+DMSO	Tachyzoites+3-MB-PP1	Tachyzoites+BAPTA-AM	Tachyzoites+Compound 1	Bradyzoites+DMSO	Bradyzoites+3-MB-PP1	Bradyzoites+BAPTA-AM	Bradyzoites+Compound 1
Number of values	20	20	20	20	20	20	20	20
Minimum	19.78	0	0	0	2.828	0	0	0
Maximum	74.77	10.06	9.682	9.849	25.86	5.472	5.286	1
Range	54.99	10.06	9.682	9.849	23.03	5.472	5.286	1
Mean	42.35	2.498	2.374	1.178	11.76	0.6998	0.9391	0.09
Std. Deviation	13.41	3.312	3.807	2.789	7	1.605	1.758	0.2789
Std. Error of Mean	2.998	0.7405	0.8513	0.6237	1.565	0.3589	0.3932	0.06237
