# Supplementary material for: Toxoplasma bradyzoites exhibit physiological plasticity of calcium and energy stores controlling motility and egress
Source: eLife. 2021 Dec 3;10:e73011. doi: 10.7554/eLife.73011 (PMC8683080; doi:10.7554/eLife.73011)
Supplement: Figure 8—source data 1. [file elife-73011-fig8-data1.xlsx]

## Sheet: Sheet1
Figure 8A	Calcium fluorescence fold change of extracellular BAG1-mCherry GCaMP6f dual reporter bradyzoites treated with or without calcium or glucose for 10 min in reponse to ionomycin
		F/F0
	Time (min)	10 min Double negative										10 min Glucose										10 min Ca2+										10 min Ca2++glucose
	0	1	1	1	1	1	1	1	1	1	1	1	1	1	1	1	1	1	1	1	1	1	1	1	1	1	1	1	1	1	1	1	1	1	1	1	1	1	1	1	1
	0.25	0.945372	0.932237	1.00971	0.958867	0.956217	0.992154	1.02803	1.04412	1.01971	0.974496	1.02632	0.986344	1.00818	0.959488	0.985851	0.885812	0.917351	0.976062	0.969302	0.982025	0.940048	0.961183	1.03562	1.07479	1.24231	0.997405	0.959726	0.9741	0.986315	0.963129	1.00749	0.97406	0.993308	0.931731	0.939613	0.943226	0.924521	0.926757	0.944421	0.921145
	0.5	0.957881	0.983232	0.839959	0.939736	0.939727	0.988936	1.03938	0.982223	0.965663	0.951957	0.948568	1.09795	1.1215	0.934109	0.973226	0.904335	0.878985	1.0772	1.09872	1.06173	0.872229	0.971677	1.02883	1.06261	1.24594	1.02875	0.979415	0.988466	0.96619	0.962332	1.06531	0.962142	0.988963	0.894593	0.888447	0.893456	0.880823	0.875347	0.927209	0.858255
	0.75	0.941469	1.01752	1.08784	1.05166	1.02635	1.07121	1.13898	1.0302	0.990462	0.94306	0.950106	1.00224	1.15491	0.958556	0.919678	0.851633	0.821149	1.32516	1.31051	1.25213	1.04584	1.00736	1.04613	1.10229	1.22162	0.991282	0.962212	1.00111	0.971624	0.949377	1.16777	1.00444	1.04081	1.02421	1.00615	1.05014	1.02528	0.965462	1.03214	0.956192
	1	0.958363	0.923965	0.943153	1.0748	0.995072	1.07745	1.14756	1.13472	1.1437	1.09688	1.15074	1.06917	1.01931	0.938999	0.900522	0.83292	0.836419	1.37542	1.45627	1.39924	0.995087	0.934068	1.00281	1.11772	1.24652	0.976232	0.933771	0.95346	0.95482	0.955954	1.15184	1.03316	1.04863	0.970508	0.941059	0.974931	0.922896	0.911274	0.979054	0.918614
	1.25	0.990855	0.967453	0.990365	1.05395	0.990713	1.07705	1.12787	1.04005	1.05256	1.03203	1.13369	1.07614	1.09975	1.02491	0.976491	0.887913	0.860279	1.5773	1.76237	1.66982	1.17654	1.18165	1.16513	1.12912	1.23799	1.02325	0.968775	0.990894	1.00221	0.984056	1.18623	1.21912	1.21908	0.895503	0.901284	0.925899	0.922355	0.958317	0.977395	0.926207
	1.5	1.24499	1.26869	1.36295	1.08494	1.05667	1.08932	1.17721	1.06639	1.03243	0.982206	1.01909	1.13407	1.19517	0.956694	0.94471	0.803704	0.892537	1.74526	1.94766	1.86353	1.26445	1.19578	1.21442	1.128	1.26207	0.956305	0.894391	0.913395	0.935299	0.894569	1.24328	1.23508	1.24069	1.25032	1.25583	1.26783	1.20693	1.0915	1.10618	1.04537
	1.75	1.42196	1.41719	1.28028	1.36407	1.3713	1.40515	1.47811	1.15763	1.18122	1.15006	1.15389	1.05211	1.2237	0.955064	0.909012	0.830055	0.850926	1.5781	1.97217	2.17786	1.33653	1.42153	1.20766	1.10319	1.30742	1.05356	1.02556	1.02185	1.01791	1.00558	1.28918	1.31834	1.36557	1.50646	1.48978	1.55226	1.56609	1.29436	1.31958	1.27998
	2	1.59358	1.51506	1.41692	1.57184	1.56729	1.57896	1.65161	1.33305	1.36265	1.33234	1.38834	1.31279	1.33356	1.02072	0.957553	0.871682	0.90857	1.5386	1.91034	2.19347	1.26567	1.29706	1.42789	1.19698	1.2893	1.12455	1.06623	1.09966	1.07034	1.03229	1.26544	1.21275	1.23046	1.62516	1.65919	1.70157	1.64301	1.32652	1.4046	1.35008
	2.25	1.72464	1.53506	1.57427	1.54085	1.54018	1.64816	1.67663	1.27651	1.29886	1.31514	1.6926	1.52605	1.59849	1.1092	1.08163	0.958373	0.995037	1.27648	1.59055	1.90719	1.51007	1.40705	1.41933	1.21453	1.3038	1.25158	1.19222	1.25212	1.2572	1.24823	1.25052	1.1816	1.25102	1.82651	1.82553	1.89788	1.83153	1.43986	1.48922	1.40012
	2.5	1.65559	1.73188	1.81679	1.5529	1.46399	1.55884	1.64883	1.27608	1.29186	1.24021	1.84155	1.88933	1.6899	0.99837	0.947105	0.858316	0.891391	1.27269	1.6451	1.87654	1.66773	1.73041	1.70095	2.05931	2.18334	1.55423	1.48628	1.5601	1.56098	1.57429	1.39811	1.53009	1.45376	1.83106	1.90472	1.88203	1.84579	1.4081	1.5056	1.44042
	2.75	1.77567	1.76921	1.76723	1.47503	1.46835	1.517	1.58768	1.21418	1.20538	1.17754	1.85724	1.8829	1.93805	0.981839	0.985633	0.868245	0.911624	1.25933	1.63626	1.79068	1.61388	1.76001	1.80958	2.08558	2.13431	1.48947	1.43536	1.48452	1.47645	1.45919	1.66377	1.88553	1.71305	1.84435	1.86241	1.92903	1.87703	1.37316	1.45935	1.35358
	3	1.76341	1.77961	1.76584	1.45762	1.5182	1.54919	1.63099	1.23967	1.19691	1.24575	1.69366	1.84981	1.8115	1.36577	1.36722	1.27707	1.41248	1.21803	1.5932	1.77436	1.8078	1.65165	1.82019	2.0455	2.03191	1.36264	1.34944	1.3876	1.41165	1.37519	1.85081	1.71309	1.70705	1.8114	1.79805	1.88332	1.83839	1.41644	1.45085	1.43127
	3.25	1.64974	1.83673	1.76637	1.42013	1.45735	1.52263	1.59949	1.18141	1.19627	1.15836	1.6286	1.71297	1.62573	1.44959	1.40335	1.31755	1.48406	1.20048	1.5455	1.76821	1.75492	1.75767	1.74971	2.22158	2.15359	1.39097	1.33632	1.35148	1.33055	1.35187	1.73245	1.73324	1.73331	1.80339	1.77454	1.86101	1.81546	1.32156	1.44691	1.36351
	3.5	1.61659	1.80089	1.8002	1.4052	1.46494	1.50754	1.59022	1.2009	1.14731	1.19613	1.64409	1.62539	1.65544	1.48289	1.48063	1.35688	1.50754	1.18711	1.53246	1.74503	1.72299	1.73337	1.72581	2.13404	2.13863	1.35381	1.31474	1.39215	1.32683	1.29975	1.72564	1.69166	1.73177	1.79137	1.79082	1.79042	1.74702	1.30806	1.45977	1.36449
	3.75	1.6182	1.77758	1.60618	1.26076	1.37017	1.47516	1.51401	1.16727	1.18249	1.10874	1.69097	1.68507	1.54472	1.45774	1.45146	1.31583	1.51174	1.18592	1.52827	1.68898	1.57404	1.73824	1.80686	2.17988	2.03653	1.34084	1.26502	1.30059	1.28014	1.29138	1.70583	1.70454	1.72353	1.7566	1.72717	1.73088	1.69664	1.32831	1.4214	1.38415
	4	1.57487	1.55737	1.56472	1.35833	1.34363	1.414	1.46074	1.19812	1.19267	1.13345	1.66789	1.66788	1.6681	1.43609	1.41902	1.33912	1.4457	1.17913	1.50287	1.6859	1.67552	1.67657	1.67328	2.02594	2.08504	1.26746	1.22802	1.25941	1.28084	1.22382	1.59423	1.82969	1.7181	1.70672	1.68089	1.76313	1.71018	1.33882	1.42555	1.35261
	4.25	1.49175	1.65012	1.47495	1.28716	1.32828	1.42004	1.4378	1.09938	1.11658	1.09292	1.6326	1.55675	1.6664	1.3858	1.41532	1.28127	1.42203	1.17435	1.48719	1.67715	1.54594	1.65572	1.78941	2.12119	2.06487	1.2931	1.24821	1.26457	1.25086	1.21575	1.70707	1.58518	1.779	1.62862	1.59718	1.71724	1.65547	1.30945	1.39776	1.34657
	4.5	1.55462	1.42942	1.5582	1.29979	1.2934	1.36592	1.46166	1.12208	1.10365	1.02017	1.56397	1.63755	1.45681	1.44028	1.39377	1.23105	1.33062	1.17036	1.483	1.65043	1.58128	1.68771	1.68578	1.96333	2.09632	1.26674	1.233	1.21145	1.18897	1.18306	1.68425	1.67101	1.68643	1.63699	1.63226	1.69972	1.67208	1.30349	1.35462	1.30705
	4.75	1.56973	1.44738	1.44978	1.23474	1.26232	1.35063	1.44058	1.08246	1.09771	1.03519	1.66488	1.55358	1.4423	1.38882	1.37767	1.21386	1.3161	1.1532	1.4799	1.64569	1.65215	1.6968	1.68611	1.83354	1.99486	1.15527	1.12878	1.1292	1.1135	1.1427	1.68255	1.59255	1.78302	1.63426	1.67239	1.70507	1.71253	1.27551	1.33036	1.29439
	5	1.36424	1.58878	1.3963	1.229	1.20735	1.31141	1.4114	1.08182	1.06804	1.00751	1.52141	1.52088	1.55391	1.37113	1.35133	1.28146	1.27318	1.14861	1.46488	1.59674	1.5626	1.71211	1.70867	1.61487	1.84594	1.17468	1.13504	1.15813	1.1605	1.16233	1.58988	1.66498	1.75516	1.63281	1.6017	1.65161	1.62026	1.2634	1.30527	1.24961
	5.25	1.47269	1.33175	1.41251	1.1565	1.1558	1.24462	1.34306	1.02035	1.0231	0.938711	1.47853	1.62477	1.51408	1.43795	1.32521	1.21864	1.26249	1.13066	1.45119	1.52531	1.62093	1.77737	1.59573	1.56467	1.72203	1.09569	1.09636	1.10967	1.10535	1.08979	1.66213	1.6177	1.68076	1.57619	1.62773	1.62415	1.59967	1.24415	1.29096	1.24649
	5.5	1.30322	1.45668	1.43179	1.10886	1.14841	1.1722	1.31828	0.987149	1.01992	0.954132	1.46747	1.63994	1.45854	1.32643	1.29734	1.23181	1.29551	1.05466	1.33282	1.45246	1.58214	1.62369	1.6969	1.49268	1.6623	1.07805	1.06434	1.10471	1.06581	1.03727	1.7061	1.53879	1.63003	1.6166	1.58651	1.61438	1.61809	1.25605	1.3117	1.1986
	5.75	1.36603	1.36677	1.36585	1.05433	1.15637	1.19795	1.27056	0.983722	0.993429	0.952353	1.51113	1.49805	1.51263	1.29825	1.28537	1.23258	1.25486	1.05306	1.27208	1.42833	1.60563	1.61264	1.68022	1.35584	1.54378	1.08033	1.08234	1.10866	1.10294	1.09397	1.62979	1.57611	1.63498	1.56199	1.54674	1.6706	1.58812	1.22926	1.28702	1.26655
	6	1.36448	1.33463	1.3433	1.05586	1.1359	1.17341	1.2643	0.989719	0.982408	0.933768	1.5802	1.39205	1.47736	1.27148	1.28407	1.16326	1.28252	0.924397	1.08944	1.18685	1.58572	1.59755	1.63278	1.33896	1.45821	1.02169	1.03679	1.07527	1.08704	1.04315	1.53184	1.59387	1.65068	1.59112	1.52992	1.56866	1.56808	1.19829	1.24637	1.20113
	6.25	1.2125	1.37221	1.42136	0.98546	1.12699	1.16938	1.3016	0.935961	0.957397	0.862594	1.46614	1.4733	1.47892	1.23073	1.27819	1.16613	1.22983	0.897068	1.0773	1.18401	1.57001	1.68069	1.46934	1.19665	1.37487	1.03923	1.01044	1.05787	1.05615	1.03229	1.50492	1.59061	1.58882	1.54397	1.56464	1.58986	1.51463	1.13398	1.24264	1.16803
	6.5	1.41149	1.29256	1.2827	0.9185	1.04113	1.12955	1.24369	0.950525	0.962272	0.919731	1.50917	1.50208	1.40163	1.21374	1.23117	1.11953	1.16074	0.896469	1.0572	1.15303	1.50062	1.55537	1.63731	1.18189	1.30158	0.97862	0.945107	0.974707	1.00272	1.05371	1.58439	1.57885	1.44634	1.4939	1.50334	1.50489	1.51914	1.16772	1.19432	1.17815
	6.75	1.25216	1.36406	1.34336	0.92577	0.974223	1.07705	1.1545	0.884986	0.89593	0.872479	1.45348	1.37709	1.52868	1.23772	1.23182	1.10731	1.15234	0.890684	1.05322	1.11991	1.50306	1.59123	1.51349	1.14176	1.30368	0.914478	0.895286	0.93191	0.94355	0.948181	1.6086	1.42024	1.48445	1.45148	1.39704	1.5176	1.43409	1.13497	1.22626	1.15031
	7	1.31145	1.33161	1.31639	0.920413	0.952616	1.05029	1.20547	0.927179	0.906104	0.809609	1.35656	1.52856	1.34989	1.23423	1.19243	1.07084	1.11645	0.880112	1.0265	1.09272	1.54729	1.45283	1.54005	1.14947	1.29082	0.925169	0.902546	0.940004	0.937211	0.938714	1.5794	1.40013	1.50263	1.3803	1.41963	1.46452	1.44529	1.15721	1.17192	1.11507
