# Supplementary material for: Toxoplasma bradyzoites exhibit physiological plasticity of calcium and energy stores controlling motility and egress
Source: eLife. 2021 Dec 3;10:e73011. doi: 10.7554/eLife.73011 (PMC8683080; doi:10.7554/eLife.73011)
Supplement: Figure 8—source data 2. [file elife-73011-fig8-data2.xlsx]

## Sheet: Sheet1
Figure 8B	Calcium fluorescence fold change of extracellular BAG1-mCherry GCaMP6f dual reporter bradyzoites treated with or without calcium or glucose for 1 hr in reponse to ionomycin
		F/F0
	Time (min)	1 hr Double negative										1 hr Glucose										1 hr Ca2+										1 hr Ca2++glucose
	0	1	1	1	1	1	1	1	1	1	1	1	1	1	1	1	1	1	1	1	1	1	1	1	1	1	1	1	1	1	1	1	1	1	1	1	1	1	1	1	1
	0.25	0.946544	0.991737	0.967507	1.01662	1.00064	0.982083	1.03322	1.01784	1.0002	1.02636	1.0619	0.984022	1.00737	1.06584	1.06246	1.06502	1.07562	0.867407	0.873215	0.934272	0.963454	0.963586	0.959994	1.03972	1.05221	0.967311	0.950153	0.903362	0.940529	0.954146	1.06774	0.980041	1.01747	1.01205	0.962186	1.01159	1.07598	1.11221	1.17911	1.28314
	0.5	1.0632	0.99216	0.928729	1.04286	1.00785	0.963125	0.995694	1.01272	0.975136	0.959147	1.11625	0.922566	0.997071	1.01833	1.06069	1.00807	1.03977	0.980519	0.950352	0.931221	1.09534	1.02592	0.984021	1.05467	1.06103	0.958801	0.944785	0.948319	0.884148	0.922927	1.01705	1.01637	1.01624	1.1075	1.11026	1.08332	1.06879	1.09046	1.11048	1.07932
	0.75	1.07132	1.06516	1.05712	1.11612	1.09716	1.09229	0.999795	1.02953	1.03901	0.978466	0.954656	1.13886	0.927668	1.18665	1.01011	1.03456	1.03142	0.926267	0.988067	0.956338	1.10603	1.039	0.92971	1.03328	1.09303	0.961896	0.933857	0.898367	0.903649	0.953951	1.02452	1.11795	0.950522	1.10685	1.01374	0.985003	0.999331	1.0538	1.02005	1.03747
	1	1.01365	0.985666	1.0242	1.03739	1.00615	1.01521	1.11154	1.16284	1.19082	1.18012	1.04816	1.04935	0.899735	1.07059	1.00258	1.09363	1.10373	1.09007	1.10953	1.06737	1.10821	1.0442	0.890208	1.01986	1.06469	1.01915	0.969517	0.987512	0.955011	0.959024	1.09493	1.02469	0.996413	1.00126	0.953838	0.984097	1.23247	1.2443	1.30636	1.38715
	1.25	1.01821	1.02571	1.02005	1.0667	0.998727	1.04417	1.07279	1.12736	1.08146	1.04548	1.07703	1.0745	1.07834	1.12873	1.22066	1.28396	1.26632	1.16938	1.11153	1.1777	0.899203	1.0321	1.0232	1.0184	1.09072	1.21006	1.17849	1.15485	1.14018	1.14829	1.10559	1.1569	1.29035	1.15191	1.0827	1.02	1.24887	1.28165	1.26348	1.26458
	1.5	1.06463	1.09623	0.954269	1.29316	1.26025	1.1	1.06602	1.23125	1.13058	1.08613	1.40071	1.20744	1.27542	1.44118	1.40609	1.49378	1.34324	1.36783	1.41119	1.41761	1.72581	1.61808	1.58619	1.00711	1.09439	1.05803	1.05234	1.03343	1.067	1.05249	1.84438	1.73275	1.7954	1.12571	1.05987	0.988843	1.61105	1.56519	1.62725	1.63194
	1.75	1.14895	0.995963	1.02392	1.3466	1.29317	1.35708	1.18474	1.25185	1.19042	1.20467	1.47127	1.41326	1.38594	1.41312	1.44229	1.48265	1.47957	1.50293	1.54315	1.48709	1.76512	1.79066	1.69066	1.16912	1.19881	2.14952	1.98811	1.98425	2.00869	1.98693	2.22417	2.17062	2.14693	1.63466	1.7091	1.7102	1.82628	1.87853	1.85615	1.97426
	2	1.51071	1.63478	1.5579	1.51257	1.50276	1.54979	1.40804	1.45345	1.46129	1.39867	1.57303	1.56944	1.56828	1.38032	1.39793	1.48396	1.48718	1.52325	1.60026	1.57371	2.1124	2.02814	2.25105	1.59586	1.60103	2.22263	2.13363	1.9975	1.95154	1.94107	2.43795	2.40978	2.46521	2.05834	2.17559	2.16935	2.22929	2.24328	2.24464	2.34477
	2.25	1.81117	1.73966	1.97397	1.43232	1.50021	1.53708	1.38056	1.52994	1.45199	1.36989	1.85129	1.95912	1.78836	1.39208	1.45707	1.54528	1.44068	1.53938	1.65076	1.43521	2.23219	2.20781	2.40274	1.67876	1.67521	2.21451	2.13267	2.0342	1.96717	1.95746	2.54224	2.61856	2.46375	2.20811	2.09622	1.98008	2.25171	2.25253	2.29132	2.43793
	2.5	1.82171	1.84283	1.81244	1.47365	1.38184	1.45	1.33566	1.44381	1.38791	1.33045	2.00901	1.98458	1.98572	1.35158	1.42242	1.51822	1.46023	1.60327	1.57405	1.47019	2.36565	2.49099	2.34066	2.39206	2.25576	2.22573	2.0972	1.96388	1.94458	1.92605	2.79366	2.64195	2.75473	2.46614	2.28697	2.19725	2.25205	2.31232	2.30913	2.42129
	2.75	1.80825	1.87854	1.8621	1.38727	1.32902	1.40396	1.28009	1.37469	1.30928	1.30187	2.0027	1.95731	1.98727	1.34706	1.37828	1.44512	1.46067	1.68182	1.71021	1.31925	2.53102	2.36248	2.39465	2.47336	2.34771	2.14139	1.99981	1.90778	1.84611	1.78244	2.68444	2.80116	2.84843	2.32135	2.16679	2.05814	2.39515	2.35275	2.38779	2.34075
	3	1.79419	1.78957	1.80726	1.37262	1.39987	1.36417	1.23477	1.35685	1.31676	1.32099	2.04642	1.83626	1.90552	1.34186	1.35114	1.35479	1.38918	1.7235	1.7703	1.37887	2.42801	2.47219	2.24571	2.56237	2.49322	2.22843	2.07209	2.04342	1.95405	1.96371	2.86835	2.73648	2.92373	2.29342	2.20573	2.03206	2.26511	2.30889	2.36203	2.30397
	3.25	1.74952	1.76044	1.74874	1.32517	1.33432	1.35833	1.22432	1.3589	1.33677	1.31898	1.99104	1.89728	1.79528	1.34706	1.37232	1.42723	1.35767	1.73712	1.7818	1.39953	2.2597	2.44712	2.39202	2.45436	2.39572	2.15899	2.04084	2.00135	1.95443	1.832	2.82118	2.86751	2.77712	2.26339	2.05803	1.93298	2.19464	2.31078	2.27922	2.25197
	3.5	1.66366	1.78013	1.78155	1.41986	1.27811	1.37042	1.27476	1.28917	1.37134	1.32079	1.78244	1.812	1.92236	1.34367	1.36085	1.30962	1.36571	1.61604	1.66205	1.42887	2.26075	2.30083	2.32635	2.406	2.28722	2.08588	1.87883	1.88492	1.80189	1.75102	2.75777	2.75026	2.72506	2.21461	2.07731	1.94584	2.14176	2.29656	2.25121	2.22413
	3.75	1.69389	1.70558	1.70512	1.30921	1.34748	1.30958	1.21448	1.30045	1.30746	1.25478	1.79558	1.78324	1.78863	1.37851	1.31538	1.29806	1.32877	1.55048	1.57021	1.40376	2.18566	2.18206	2.28007	2.3045	2.24003	1.87292	1.79831	1.82037	1.79668	1.7641	2.52959	2.69164	2.76683	2.12605	2.06009	1.99439	2.14444	2.34624	2.31898	2.19594
	4	1.64687	1.69068	1.7266	1.37415	1.35299	1.44958	1.22022	1.30394	1.31757	1.24754	1.83137	1.90338	1.66552	1.3871	1.3209	1.26751	1.33572	1.42752	1.45408	1.36502	2.21162	2.19715	2.20222	2.20991	2.18375	1.77756	1.71108	1.76984	1.65553	1.66966	2.63032	2.43599	2.62203	2.16871	2.0921	1.95091	2.11665	2.24413	2.22873	2.07477
	4.25	1.6437	1.65744	1.72171	1.33676	1.2902	1.2875	1.19233	1.19524	1.16374	1.18012	1.66535	1.82634	1.88512	1.34457	1.25513	1.31093	1.26575	1.32509	1.35606	1.36362	2.19915	2.04152	2.20699	2.16142	2.1527	1.7499	1.74118	1.70682	1.62599	1.60702	2.48898	2.61021	2.43568	2.06331	2.01123	1.84966	2.11247	2.22957	2.23098	2.12835
	4.5	1.66194	1.62406	1.52148	1.23311	1.29911	1.29583	1.11729	1.20119	1.21063	1.19098	1.71406	1.90006	1.689	1.32421	1.26396	1.29719	1.23359	1.30436	1.33262	1.28662	2.12379	2.08939	2.1655	2.11452	2.0556	1.72128	1.71607	1.72392	1.67465	1.63161	2.45563	2.48998	2.4388	2.07249	1.94946	1.88082	1.95029	2.03409	1.98911	1.9149
	4.75	1.66088	1.5212	1.48421	1.2635	1.24289	1.31958	1.11462	1.14151	1.18961	1.17589	1.72271	1.69863	1.80043	1.30452	1.26992	1.26707	1.20317	1.19858	1.20967	1.27535	2.09144	2.089	2.0694	2.07015	1.99322	1.66538	1.64571	1.64592	1.64433	1.53483	2.3218	2.43596	2.42184	1.97896	1.9152	1.73773	1.85473	1.9128	1.92929	1.8657
	5	1.41641	1.50023	1.63245	1.23289	1.2028	1.29979	1.1058	1.11526	1.094	1.11672	1.71119	1.82356	1.63672	1.30634	1.26175	1.26337	1.16189	1.16925	1.20989	1.23451	2.06228	2.12168	1.90046	2.01036	2.00651	1.62476	1.47929	1.59443	1.51767	1.48722	2.32882	2.24942	2.38989	1.89767	1.81655	1.7102	1.86109	1.92496	1.89765	1.81439
	5.25	1.45149	1.48833	1.45976	1.22698	1.24289	1.22	1.02809	1.06891	1.07621	1.10807	1.73844	1.7366	1.67873	1.29683	1.26087	1.20816	1.13451	1.20821	1.37545	1.41432	1.91192	1.96743	2.12771	1.99814	1.92474	1.56383	1.45226	1.52526	1.4945	1.416	2.31285	2.35563	2.16842	1.89939	1.83564	1.77812	1.67163	1.78602	1.73772	1.72982
	5.5	1.50442	1.41811	1.40593	1.19571	1.14871	1.20938	1.00431	1.06686	1.09784	1.03985	1.66027	1.67289	1.78787	1.2638	1.17634	1.24656	1.18644	1.02472	1.02919	1.29131	1.99735	1.91441	1.93152	1.96718	1.91077	1.54932	1.46607	1.45898	1.49102	1.36254	2.21921	2.22692	2.19944	2.07517	2.03538	1.87321	1.56084	1.69505	1.66805	1.60077
	5.75	1.4104	1.42472	1.409	1.19593	1.17331	1.14896	1.00369	1.05783	1.05923	1.01952	1.72224	1.64302	1.71996	1.23823	1.20901	1.19223	1.13212	1.07017	1.12806	1.44812	1.92667	1.91774	1.89758	1.90886	1.85245	1.44584	1.32899	1.41287	1.35084	1.31961	2.20192	2.15682	2.00726	2.14977	2.09453	2.00018	1.56335	1.61007	1.58662	1.571
	6	1.44671	1.38867	1.39653	1.16751	1.13407	1.14229	0.965963	1.00103	1.00445	0.982894	1.78672	1.55478	1.67159	0.852262	0.866255	0.852062	0.857019	1.05823	1.06456	1.37512	1.96994	1.82231	1.84587	1.82623	1.84744	1.34062	1.32189	1.42824	1.34929	1.30634	2.03918	2.10327	2.08911	2.12223	2.01591	1.97718	1.50879	1.55782	1.53752	1.50131
	6.25	1.29559	1.38701	1.43256	1.10409	1.1084	1.09792	0.982571	0.953651	0.961997	0.96458	1.68369	1.62516	1.62852	0.815837	0.768704	0.78333	0.7701	1.04022	0.993608	1.37512	1.85081	1.81921	1.82301	1.24857	1.18986	1.4205	1.32726	1.439	1.36242	1.26322	2.0453	2.05374	2.02505	2.05566	2.01797	1.93063	1.46628	1.50266	1.54028	1.46507
	6.5	1.47219	1.26137	1.28855	1.10999	1.08464	1.06062	0.933566	0.950369	0.920356	0.900181	1.68452	1.61116	1.63096	0.808824	0.793644	0.787694	0.822251	0.980101	1.02301	1.27394	1.81593	1.74918	1.83968	0.718746	0.685381	1.30252	1.2176	1.29548	1.19386	1.17327	1.9733	2.06953	1.88806	2.0637	1.98371	1.87158	1.40134	1.47062	1.4471	1.38295
	6.75	1.31417	1.29666	1.29145	1.09687	1.07276	1.07792	0.895222	0.924938	0.910451	0.951298	1.67832	1.47351	1.65101	0.818326	0.754138	0.782675	0.788787	0.934855	0.965267	1.27136	1.74073	1.77422	1.75694	0.63239	0.631543	1.25242	1.20993	1.29818	1.21838	1.15356	1.96555	1.93721	1.92309	1.9979	2.00094	1.95635	1.38745	1.48518	1.45954	1.40221
	7	1.25518	1.28573	1.31445	1.07216	1.03691	1.03833	0.892557	0.925349	0.918132	0.884081	1.63842	1.56437	1.57408	0.740724	0.759876	0.765874	0.718601	0.905949	0.970168	1.31948	1.73483	1.69494	1.7876	0.540189	0.573095	1.29865	1.22508	1.30163	1.20023	1.14673	1.91755	1.84527	1.9771	1.90723	1.8669	1.90726	1.28351	1.37382	1.34889	1.28944
