# Supplementary material for: Toxoplasma bradyzoites exhibit physiological plasticity of calcium and energy stores controlling motility and egress
Source: eLife. 2021 Dec 3;10:e73011. doi: 10.7554/eLife.73011 (PMC8683080; doi:10.7554/eLife.73011)
Supplement: Figure 8—source data 3. [file elife-73011-fig8-data3.xlsx]

## Sheet: Sheet1
Figure 8C	Recovery of microneme secretion by bradyzoites in EC buffer containing calcium and glucose
	RLU of secreted MIC2-Gluc from bradyzoites in reponse to ionomycin
	10 min Ca2++glucose	1 hr Ca2++glucose
#1	464.333	764.333
	439.333	887.333
	411.333	625.333
#2	360.333	587.333
	353.333	538.333
	301.333	509.333
Mean	388.3	652
Std. Deviation	60.8	145.7
Std. Error of Mean	24.82	59.49
	Two-tailed Mann-Whitney test
	P value	0.0022
	P value summary	**
