# Supplementary material for: Toxoplasma bradyzoites exhibit physiological plasticity of calcium and energy stores controlling motility and egress
Source: eLife. 2021 Dec 3;10:e73011. doi: 10.7554/eLife.73011 (PMC8683080; doi:10.7554/eLife.73011)
Supplement: Figure 8—source data 4. [file elife-73011-fig8-data4.xlsx]

## Sheet: Sheet1
Figure 8D	Percentage of gliding motility of bradyzoites treated with or without glucose or calcium for 10 min or 1 hr
			Percentage of gliding motility
			Twirl						Circle						Helix
		Bradyzoites-Ca2+-glucose 10 min	1.35	0	1.24	2.08	2.36	1.98	0	1.95	0.62	0	0.79	0	0	1.95	0	0	0.79	0
		Bradyzoites+Ca2+-glucose 10 min	0	0	0	4.35	1.39	0	0	2.44	0	0	0	0	1.69	2.44	3.85	0	0	0
		Bradyzoites-Ca2++glucose 10 min	3.03	0	0	0	2.13	0.96	0	0	2.04	0	0	0	0	1.22	2.04	0	2.13	0
		Bradyzoites+Ca2++glucose 10 min	3.125	4.41	0	0	3.73	3.33	0	0	0	0	0	0	0	0	0	1.1	0	3.33
		Bradyzoites-Ca2+-glucose 1 hr	2.39	1.4	1.82	0.92	1.29	2	0	0.7	0	0	0	0	0	1.4	1.82	0	1.29	0
		Bradyzoites+Ca2+-glucose 1 hr	5.06	2.38	1.49	6	3.57	1.92	0	0	0	0	1.79	1.92	0	2.38	1.49	2	5.36	3.85
		Bradyzoites-Ca2++glucose 1 hr	2.27	2.94	0	2.08	0	1.82	0	0	0	0	0	1.82	0	0	2.7	0	2.74	1.82
		Bradyzoites+Ca2++glucose 1 hr	12	11.11	3.17	10	10.2	16.62	3	5.56	6.34	2.5	1.7	0	3	0	6.34	7.5	3.4	2.77
			Individual experiment #1			Individual experiment #2			Individual experiment #1			Individual experiment #2			Individual experiment #1			Individual experiment #2
			Sum up the total percentage of bradyzoites with gliding motility(Twirl+Circle+Helix)
							Bradyzoites-Ca2+-glucose 10 min	Bradyzoites+Ca2+-glucose 10 min	Bradyzoites-Ca2++glucose 10 min	Bradyzoites+Ca2++glucose 10 min	Bradyzoites-Ca2+-glucose 1hr	Bradyzoites+Ca2+-glucose 1hr	Bradyzoites-Ca2++glucose 1hr	Bradyzoites+Ca2++glucose 1hr
						Individual experiment #1	1.35	6.76	6.06	3.125	4.39	5.06	2.27	18
							7.8	4.88	1.22	7.41	3.5	4.76	2.94	16.67
							1.86	3.85	6.12	0	3.64	2.98	2.7	15.85
						Individual experiment #2	2.08	4.35	0	1.1	0	8	2.08	20
							3.94	1.39	4.26	3.73	3.58	10.72	2.74	15.3
							1.98	0	0.96	6.66	2	7.69	5.46	19.39
						Dunn's multiple comparisons test	Mean rank diff.	Significant?	Summary	Adjusted P Value	E-?
						Bradyzoites-Ca2+-glucose 1 hr vs. Bradyzoites-Ca2+-glucose 10 min	0.1667	No	ns	>0.9999	A	Bradyzoites-Ca2+-glucose 10 min
						Bradyzoites-Ca2+-glucose 1 hr vs. Bradyzoites+Ca2+-glucose 10 min	-3.833	No	ns	>0.9999	B	Bradyzoites+Ca2+-glucose 10 min
						Bradyzoites-Ca2+-glucose 1 hr vs. Bradyzoites-Ca2++glucose 10 min	-0.1667	No	ns	>0.9999	C	Bradyzoites-Ca2++glucose 10 min
						Bradyzoites-Ca2+-glucose 1 hr vs. Bradyzoites+Ca2++glucose 10 min	-2.833	No	ns	>0.9999	D	Bradyzoites+Ca2++glucose 10 min
						Bradyzoites-Ca2+-glucose 1 hr vs. Bradyzoites+Ca2+-glucose 1 hr	-15.58	No	ns	0.3765	F	Bradyzoites+Ca2+-glucose 1 hr
						Bradyzoites-Ca2+-glucose 1 hr vs. Bradyzoites-Ca2++glucose 1 hr	-0.5	No	ns	>0.9999	G	Bradyzoites-Ca2++glucose 1 hr
						Bradyzoites-Ca2+-glucose 1 hr vs. Bradyzoites+Ca2++glucose 1 hr	-27.25	Yes	**	0.0052	H	Bradyzoites+Ca2++glucose 1 hr
						Test details	Mean rank 1	Mean rank 2	Mean rank diff.	n1	n2	Z
						Bradyzoites-Ca2+-glucose 1 hr vs. Bradyzoites-Ca2+-glucose 10 min	18.25	18.08	0.1667	6	6	0.02063
						Bradyzoites-Ca2+-glucose 1 hr vs. Bradyzoites+Ca2+-glucose 10 min	18.25	22.08	-3.833	6	6	0.4744
						Bradyzoites-Ca2+-glucose 1 hr vs. Bradyzoites-Ca2++glucose 10 min	18.25	18.42	-0.1667	6	6	0.02063
						Bradyzoites-Ca2+-glucose 1 hr vs. Bradyzoites+Ca2++glucose 10 min	18.25	21.08	-2.833	6	6	0.3506
						Bradyzoites-Ca2+-glucose 1 hr vs. Bradyzoites+Ca2+-glucose 1 hr	18.25	33.83	-15.58	6	6	1.929
						Bradyzoites-Ca2+-glucose 1 hr vs. Bradyzoites-Ca2++glucose 1 hr	18.25	18.75	-0.5	6	6	0.06188
						Bradyzoites-Ca2+-glucose 1 hr vs. Bradyzoites+Ca2++glucose 1 hr	18.25	45.5	-27.25	6	6	3.372
