# Supplementary material for: Toxoplasma bradyzoites exhibit physiological plasticity of calcium and energy stores controlling motility and egress
Source: eLife. 2021 Dec 3;10:e73011. doi: 10.7554/eLife.73011 (PMC8683080; doi:10.7554/eLife.73011)
Supplement: Figure 8—source data 5. [file elife-73011-fig8-data5.xlsx]

## Sheet: Sheet1
Figure 8D	Fig 8F Percentage of gliding motility of bradyzoites treated with glucose or calcium for 1 hr
			Percentage of gliding motility
			Twirl						Circle						Helix
		Bradyzoites+Ca2+	1.75	3.85	1.92	4.08	2.63	2.78	1.75	0	1.92	2.04	0	0	0	3.85	3.85	2.04	2.63	2.78
		Bradyzoites+glucose	4.55	5	11.11	8.33	6.25	12	0	0	0	8.33	6.25	0	13.64	10	5.56	0	3.125	4
		Bradyzoites+glutamine	10	4.55	10.26	7.22	7.14	9.1	0	0	1.28	0	0	0	5	9.09	5.13	3.61	14.29	4.55
		Bradyzoites+glucose+2-DOG	2.63	0	2.04	0	0	0	0	0	0	0	0	0	2.63	2.08	2.04	0	0	0
		Bradyzoites+glutamine+Oligomycin A	1.05	1.72	0	0	0	2.08	0	0	0	0	0	0	0	1.72	0	0	0	0
		Bradyzoites+glucose+Oligomycin A	2.35	1.85	0	0	0	1.49	0	0	0	0	0	0	2.35	0	0	0	0	0
			Individual experiment #1			Individual experiment #2			Individual experiment #1			Individual experiment #2			Individual experiment #1			Individual experiment #2
			Sum up the total percentage of bradyzoites with gliding motility(Twirl+Circle+Helix)
		Bradyzoites+Ca2+	3.5	7.7	7.69	8.16	5.26	5.56
		Bradyzoites+glucose	18.19	15	16.67	16.66	15.625	16
		Bradyzoites+glutamine	15	13.64	16.67	10.83	21.43	13.65
		Bradyzoites+glucose+2-DOG	5.26	2.08	4.08	0	0	0
		Bradyzoites+glutamine+Oligomycin A	1.05	3.44	0	0	0	2.08
		Bradyzoites+glucose+Oligomycin A	4.7	1.85	0	0	0	1.49
			Individual experiment #1			Individual experiment #2
			Bradyzoites-Ca2+	Bradyzoites+glucose	Bradyzoites-glutamine	Bradyzoites+glucose+2-DOG	Bradyzoites+glutamine+Oligomycin A	Bradyzoites+glucose+Oligomycin A
		Mean	6.312	16.36	15.2	1.903	1.095	1.34
		Std. Deviation	1.834	1.1	3.604	2.32	1.419	1.842
		Std. Error of Mean	0.7488	0.4492	1.471	0.947	0.5793	0.7519
		Dunnett's multiple comparisons test	Mean Diff.	95.00% CI of diff.	Significant?	Summary	Adjusted P Value	A-?
		Bradyzoites-Ca2+ vs. Bradyzoites+glucose	-10.05	-13.83 to -6.260	Yes	***	0.0007	B
		Bradyzoites-Ca2+ vs. Bradyzoites+glutamine	-8.892	-15.75 to -2.037	Yes	*	0.0182	C
		Bradyzoites-Ca2+ vs. Bradyzoites+glucose+2-DOG	4.408	-0.5435 to 9.360	No	ns	0.0754	D
		Bradyzoites-Ca2+ vs. Bradyzoites+glutamine+Oligomycin A	5.217	1.827 to 8.606	Yes	**	0.0088	E
		Bradyzoites-Ca2+ vs. Bradyzoites+glucose+Oligomycin A	4.972	-0.02538 to 9.969	No	ns	0.0509	F
		Test details	Mean 1	Mean 2	Mean Diff.	SE of diff.	n1	n2
		Bradyzoites-Ca2+ vs. Bradyzoites+glucose	6.312	16.36	-10.05	1.047	6	6
		Bradyzoites-Ca2+ vs. Bradyzoites+glutamine	6.312	15.2	-8.892	1.896	6	6
		Bradyzoites-Ca2+ vs. Bradyzoites+glucose+2-DOG	6.312	1.903	4.408	1.37	6	6
		Bradyzoites-Ca2+ vs. Bradyzoites+glutamine+Oligomycin A	6.312	1.095	5.217	0.9375	6	6
		Bradyzoites-Ca2+ vs. Bradyzoites+glucose+Oligomycin A	6.312	1.34	4.972	1.382	6	6
