# Supplementary material for: Toxoplasma bradyzoites exhibit physiological plasticity of calcium and energy stores controlling motility and egress
Source: eLife. 2021 Dec 3;10:e73011. doi: 10.7554/eLife.73011 (PMC8683080; doi:10.7554/eLife.73011)
Supplement: Figure 8—source data 6. [file elife-73011-fig8-data6.xlsx]

## Sheet: Sheet1
Figure 8G	ATP, ADP and AMP levels in tachyzoites and bradyzoites treated with glucose and calcium containing EC buffer for 10 min or 1 hr
		pmol/parasites(107)
		10 min EC buffer						1 hr EC buffer
Tachyzoites	ATP	519.23	592.29	625.74	937.99	648.65	1175.36	1321.54	1417.92	1369.96	544.54	666.46	749.25
	ADP	273.13	305.42	322.02	747.81	461.18	879.98	1207.67	1449.14	1329.33	304.67	371.25	406.14
	AMP	309.79	349.79	368.38	484.83	289.95	606.78	696.5	724.72	609.03	411.21	494.73	555.35
Bradyzoites	ATP	422.465	422.421	420.888	188.861	188.859	167.034	745.526	740.43	886.604	1708.32	1709.61	1694.98
	ADP	459.265	458.841	429.557	317.876	318.058	260.195	499.852	498.725	578.255	739.423	736.529	730.582
	AMP	314.543	313.953	296.485	274.232	273.701	223.356	319.06	319.485	391.324	401.461	401.277	403.604
		Independent experiment #1			Independent experiment #2			Independent experiment #1			Independent experiment #2
		10 min EC buffer			1 hr EC buffer
		Mean	SD	N	Mean	SD	N
Tachyzoites	ATP	749.877	253.026	6	1011.61	398.917	6
	ADP	498.257	256.239	6	844.7	536.672	6
	AMP	401.587	121.416	6	581.923	119.754	6
Bradyzoites	ATP	301.755	131.882	6	1247.58	503.088	6
	ADP	373.965	85.7736	6	630.561	118.563	6
	AMP	282.712	34.2201	6	372.702	41.605	6
	Mutiple T tests
		P value	Mean of 10 min EC buffer	Mean of 1 hr EC buffer	Difference	SE of difference	t ratio	df	q value
Tachyzoites	ATP	0.204569	749.9	1012	-261.7	192.9	1.357	10	0.103308
	ADP	0.184066	498.3	844.7	-346.4	242.8	1.427	10	0.103308
	AMP	0.026938	401.6	581.9	-180.3	69.62	2.59	10	0.020406
Bradyzoites	ATP	0.001226	301.8	1248	-945.8	212.3	4.455	10	0.002194
	ADP	0.001574	374	630.6	-256.6	59.74	4.295	10	0.002194
	AMP	0.002173	282.7	372.7	-89.99	21.99	4.092	10	0.002194
