# Supplementary material for: Toxoplasma bradyzoites exhibit physiological plasticity of calcium and energy stores controlling motility and egress
Source: eLife. 2021 Dec 3;10:e73011. doi: 10.7554/eLife.73011 (PMC8683080; doi:10.7554/eLife.73011)
Supplement: Figure 8—source data 7. [file elife-73011-fig8-data7.xlsx]

## Sheet: Sheet1
Figure 8H		ATP/ADP ratio of tachyzoites and bradyzoites treated with glucose and calcium containing EC buffer for 10 min and 1 hr
		ATP/ADP ratio
		10 min in EC buffer						1 hr in EC buffer
ATP/ADP	Tachyzoites	1.9	1.94	1.94	1.25	1.41	1.34	1.09	0.98	1.03	1.79	1.8	1.84
	Bradyzoites	0.919873	0.920627	0.979821	0.594134	0.593789	0.641956	1.4915	1.48464	1.53324	2.31034	2.32118	2.32004
		Indepentdent experiment #1			Indepentdent experiment #2			Indepentdent experiment #1			Indepentdent experiment #2
					10 min in EC buffer			1 hr in EC buffer
					Mean	SD	N	Mean	SD	N
			ATP/ADP	Tachyzoites	1.63	0.329242	6	1.42167	0.427149	6
				Bradyzoites	0.775033	0.182974	6	1.91016	0.446205	6
			Mutiple t tests
					P value	Mean of 10 min	Mean of 1 hr	Difference	SE of difference	t ratio	df	q value
			ATP/ADP	Tachyzoites	0.366336	1.63	1.422	0.2083	0.2202	0.9462	10	0.185
				Bradyzoites	0.000181	0.775	1.91	-1.135	0.1969	5.765	10	0.000183
