# Supplementary material for: Toxoplasma bradyzoites exhibit physiological plasticity of calcium and energy stores controlling motility and egress
Source: eLife. 2021 Dec 3;10:e73011. doi: 10.7554/eLife.73011 (PMC8683080; doi:10.7554/eLife.73011)
Supplement: Figure 8—source data 8. [file elife-73011-fig8-data8.xlsx]

## Sheet: Sheet1
Figure 8I		Energy charge of tachyzoites and bradyzoites treated with glucose and calcium containing EC buffer for 10 min and 1 hr
		Energy charge
		10 min in EC buffer						1 hr in EC buffer
Energy charge	Tachyzoites	0.595016	0.597192	0.597769	0.604384	0.628129	0.60679	0.596885	0.596497	0.615002	0.552893	0.55603	0.556671
	Bradyzoites	0.545107	0.545376	0.554233	0.445343	0.445657	0.456714	0.6363	0.635036	0.633414	0.729338	0.729741	0.728226
		Indepentdent experiment #1			Indepentdent experiment #2			Indepentdent experiment #1			Indepentdent experiment #2
					10 min in EC buffer			1 hr in EC buffer
					Mean	SD	N	Mean	SD	N
			Energy charge	Tachyzoites	0.60488	0.0122587	6	0.578996	0.0269442	6
				Bradyzoites	0.498738	0.0544785	6	0.682009	0.0515977	6
		Mutiple t tests
				P value	Mean of 10 min	Mean of 1 hr	Difference	SE of difference	t ratio	df	q value
		Energy charge	Tachyzoites	0.057857	0.6049	0.579	0.02588	0.01208	2.142	10	0.029218
			Bradyzoites	0.000135	0.4987	0.682	-0.1833	0.03063	5.983	10	0.000137
